# Supplementary material for: On the thermodynamic and kinetic aspects of immersion ice nucleation
Source: Copernicus journal article supplement (doi:10.5194/acp-18-17119-2018), 2018-12-04
Supplement: Supplementary file 1 [file Fig_data.xlsx]

## Sheet: Fig4
		T (K)	Dg(J)	ng
		200	3.44507e-19	2
		200.5	3.43854e-19	2
		201	3.4319e-19	2
		201.5	3.42515e-19	2
		202	3.41827e-19	2
		202.5	3.41127e-19	2
		203	3.40414e-19	2
		203.5	3.39687e-19	2
		204	3.38946e-19	2
		204.5	3.3819e-19	2
		205	3.37418e-19	2
		205.5	3.3663e-19	2
		206	3.35826e-19	2
		206.5	3.35003e-19	2
		207	3.34163e-19	2
		207.5	3.33304e-19	2
		208	3.32425e-19	2
		208.5	3.31526e-19	2
		209	3.30606e-19	2
		209.5	3.29665e-19	2
		210	3.28701e-19	2
		210.5	3.27714e-19	2
		211	3.26704e-19	2
		211.5	3.25669e-19	2
		212	3.2461e-19	2
		212.5	3.23524e-19	2
		213	3.22413e-19	2
		213.5	3.21275e-19	2
		214	3.20109e-19	2
		214.5	3.18915e-19	2
		215	3.17693e-19	2
		215.5	3.16441e-19	2
		216	3.1516e-19	2
		216.5	3.13849e-19	2
		217	3.12507e-19	2
		217.5	3.11135e-19	2
		218	3.09731e-19	2
		218.5	3.08295e-19	2
		219	3.06827e-19	2
		219.5	3.05327e-19	2
		220	3.03795e-19	2
		220.5	3.0223e-19	2
		221	3.00632e-19	2
		221.5	2.99001e-19	2
		222	2.97337e-19	2
		222.5	2.95639e-19	2
		223	2.93909e-19	2
		223.5	2.92146e-19	2
		224	2.90349e-19	2
		224.5	2.8852e-19	2
		225	2.86658e-19	2
		225.5	2.84763e-19	2
		226	2.82836e-19	2
		226.5	2.80877e-19	2
		227	2.78885e-19	2
		227.5	2.76862e-19	2
		228	2.74808e-19	2
		228.5	2.72723e-19	2
		229	2.70607e-19	2
		229.5	2.68461e-19	2
		230	2.66285e-19	2
		230.5	2.64079e-19	2
		231	2.61845e-19	2
		231.5	2.59582e-19	2
		232	2.5729e-19	2
		232.5	2.54971e-19	2
		233	2.52625e-19	2
		233.5	2.50252e-19	2
		234	2.47853e-19	2
		234.5	2.45428e-19	2
		235	2.42977e-19	2
		235.5	2.40502e-19	2
		236	2.38002e-19	2
		236.5	2.35478e-19	2
		237	2.3293e-19	2
		237.5	2.3036e-19	2
		238	2.27767e-19	2
		238.5	2.25152e-19	2
		239	2.22515e-19	2
		239.5	2.19856e-19	2
		240	2.17177e-19	2
		240.5	2.14477e-19	2
		241	2.11758e-19	2
		241.5	2.09018e-19	2
		242	2.06259e-19	2
		242.5	2.03481e-19	2
		243	2.00685e-19	2
		243.5	1.9787e-19	2
		244	1.95037e-19	2
		244.5	1.92186e-19	2
		245	1.89318e-19	2
		245.5	1.86433e-19	2
		246	1.83531e-19	2
		246.5	1.80613e-19	2
		247	1.77678e-19	2
		247.5	1.74727e-19	2
		248	1.71761e-19	2
		248.5	1.68779e-19	2
		249	1.65781e-19	2
		249.5	1.62768e-19	2
		250	1.59741e-19	2
		250.5	1.56698e-19	2
		251	1.53641e-19	2
		251.5	1.50569e-19	2
		252	1.47484e-19	2
		252.5	1.44384e-19	2
		253	1.4127e-19	2
		253.5	1.38142e-19	2
		254	1.35e-19	2
		254.5	1.31845e-19	2
		255	1.28676e-19	2
		255.5	1.25494e-19	2
		256	1.22299e-19	2
		256.5	1.19091e-19	2
		257	1.15869e-19	2
		257.5	1.12635e-19	2
		258	1.09387e-19	2
		258.5	1.06127e-19	2
		259	1.02854e-19	2
		259.5	9.95684e-20	2
		260	9.62702e-20	2
		260.5	9.29594e-20	2
		261	8.96362e-20	2
		261.5	8.63006e-20	2
		262	8.29527e-20	2
		262.5	7.95924e-20	2
		263	7.62199e-20	2
		263.5	7.28353e-20	2
		264	6.94385e-20	2
		264.5	6.60296e-20	2
		265	6.26087e-20	2
		265.5	5.91758e-20	2
		266	5.57309e-20	2
		266.5	5.22741e-20	2
		267	4.88055e-20	2
		267.5	4.5325e-20	2
		268	4.18327e-20	2
		268.5	3.83287e-20	2
		269	3.48129e-20	2
		269.5	3.12855e-20	2
		270	2.77465e-20	2
		270.5	2.41958e-20	2
		271	2.06336e-20	2
		271.5	1.70598e-20	2
		272	1.34745e-20	2
		272.5	9.99451e-21	2.02363
		273	8.58022e-21	2.73706
		200	8.60294e-20	2
		200.5	8.58752e-20	2
		201	8.57182e-20	2
		201.5	8.55584e-20	2
		202	8.53956e-20	2
		202.5	8.52298e-20	2
		203	8.50606e-20	2
		203.5	8.48882e-20	2
		204	8.47121e-20	2
		204.5	8.45324e-20	2
		205	8.43489e-20	2
		205.5	8.41614e-20	2
		206	8.39697e-20	2
		206.5	8.37738e-20	2
		207	8.35733e-20	2
		207.5	8.33682e-20	2
		208	8.31583e-20	2
		208.5	8.29435e-20	2
		209	8.27234e-20	2
		209.5	8.24981e-20	2
		210	8.22673e-20	2
		210.5	8.20308e-20	2
		211	8.17885e-20	2
		211.5	8.15403e-20	2
		212	8.12859e-20	2
		212.5	8.10251e-20	2
		213	8.0758e-20	2
		213.5	8.04842e-20	2
		214	8.02036e-20	2
		214.5	7.99162e-20	2
		215	7.96217e-20	2
		215.5	7.932e-20	2
		216	7.90111e-20	2
		216.5	7.86947e-20	2
		217	7.83708e-20	2
		217.5	7.80393e-20	2
		218	7.77001e-20	2
		218.5	7.7353e-20	2
		219	7.69981e-20	2
		219.5	7.66353e-20	2
		220	7.62644e-20	2
		220.5	7.58855e-20	2
		221	7.54985e-20	2
		221.5	7.51034e-20	2
		222	7.47001e-20	2
		222.5	7.42887e-20	2
		223	7.38692e-20	2
		223.5	7.34414e-20	2
		224	7.30056e-20	2
		224.5	7.25617e-20	2
		225	7.21096e-20	2
		225.5	7.16496e-20	2
		226	7.11815e-20	2
		226.5	7.07056e-20	2
		227	7.02218e-20	2
		227.5	6.97301e-20	2
		228	6.92308e-20	2
		228.5	6.87238e-20	2
		229	6.82093e-20	2
		229.5	6.76874e-20	2
		230	6.71581e-20	2
		230.5	6.66215e-20	2
		231	6.60778e-20	2
		231.5	6.5527e-20	2
		232	6.49693e-20	2
		232.5	6.44048e-20	2
		233	6.38335e-20	2
		233.5	6.32557e-20	2
		234	6.26714e-20	2
		234.5	6.20807e-20	2
		235	6.14838e-20	2
		235.5	6.08808e-20	2
		236	6.02717e-20	2
		236.5	5.96567e-20	2
		237	5.9036e-20	2
		237.5	5.84095e-20	2
		238	5.77775e-20	2
		238.5	5.71401e-20	2
		239	5.64972e-20	2
		239.5	5.58492e-20	2
		240	5.5196e-20	2
		240.5	5.45377e-20	2
		241	5.38745e-20	2
		241.5	5.32064e-20	2
		242	5.25335e-20	2
		242.5	5.1856e-20	2
		243	5.11739e-20	2
		243.5	5.04873e-20	2
		244	4.97962e-20	2
		244.5	4.91008e-20	2
		245	4.84011e-20	2
		245.5	4.76972e-20	2
		246	4.69891e-20	2
		246.5	4.6277e-20	2
		247	4.55609e-20	2
		247.5	4.48408e-20	2
		248	4.41168e-20	2
		248.5	4.3389e-20	2
		249	4.26574e-20	2
		249.5	4.19221e-20	2
		250	4.1183e-20	2
		250.5	4.04404e-20	2
		251	3.96941e-20	2
		251.5	3.89443e-20	2
		252	3.81909e-20	2
		252.5	3.74341e-20	2
		253	3.66738e-20	2
		253.5	3.59102e-20	2
		254	3.51431e-20	2
		254.5	3.43727e-20	2
		255	3.3599e-20	2
		255.5	3.28219e-20	2
		256	3.20417e-20	2
		256.5	3.12581e-20	2
		257	3.04714e-20	2
		257.5	2.96814e-20	2
		258	2.88883e-20	2
		258.5	2.8092e-20	2
		259	2.72926e-20	2
		259.5	2.64901e-20	2
		260	2.56844e-20	2
		260.5	2.48757e-20	2
		261	2.40639e-20	2
		261.5	2.32491e-20	2
		262	2.24312e-20	2
		262.5	2.16103e-20	2
		263	2.07864e-20	2
		263.5	1.99594e-20	2
		264	1.91295e-20	2
		264.5	1.82967e-20	2
		265	1.74608e-20	2
		265.5	1.6622e-20	2
		266	1.57803e-20	2
		266.5	1.49356e-20	2
		267	1.4088e-20	2
		267.5	1.32375e-20	2
		268	1.23859e-20	2.00031
		268.5	1.15409e-20	2.00228
		269	1.07152e-20	2.00875
		269.5	9.93089e-21	2.02537
		270	9.22501e-21	2.06341
		270.5	8.66269e-21	2.14589
		271	8.362e-21	2.32178
		271.5	8.5478e-21	2.70089
		272	9.67705e-21	3.54907
		272.5	1.27636e-20	5.58073
		273	2.03504e-20	11.0235
		200	4.8809e-20	2
		200.5	4.87251e-20	2
		201	4.86397e-20	2
		201.5	4.85527e-20	2
		202	4.8464e-20	2
		202.5	4.83736e-20	2
		203	4.82813e-20	2
		203.5	4.81872e-20	2
		204	4.8091e-20	2
		204.5	4.79928e-20	2
		205	4.78925e-20	2
		205.5	4.77898e-20	2
		206	4.76849e-20	2
		206.5	4.75775e-20	2
		207	4.74676e-20	2
		207.5	4.73551e-20	2
		208	4.72399e-20	2
		208.5	4.71219e-20	2
		209	4.7001e-20	2
		209.5	4.68772e-20	2
		210	4.67502e-20	2
		210.5	4.662e-20	2
		211	4.64866e-20	2
		211.5	4.63498e-20	2
		212	4.62096e-20	2
		212.5	4.60658e-20	2
		213	4.59183e-20	2
		213.5	4.57672e-20	2
		214	4.56122e-20	2
		214.5	4.54534e-20	2
		215	4.52906e-20	2
		215.5	4.51237e-20	2
		216	4.49528e-20	2
		216.5	4.47777e-20	2
		217	4.45983e-20	2
		217.5	4.44147e-20	2
		218	4.42267e-20	2
		218.5	4.40343e-20	2
		219	4.38375e-20	2
		219.5	4.36363e-20	2
		220	4.34305e-20	2
		220.5	4.32202e-20	2
		221	4.30053e-20	2
		221.5	4.27859e-20	2
		222	4.25619e-20	2
		222.5	4.23333e-20	2
		223	4.21001e-20	2
		223.5	4.18624e-20	2
		224	4.162e-20	2
		224.5	4.13731e-20	2
		225	4.11217e-20	2
		225.5	4.08657e-20	2
		226	4.06053e-20	2
		226.5	4.03404e-20	2
		227	4.0071e-20	2
		227.5	3.97973e-20	2
		228	3.95192e-20	2
		228.5	3.92369e-20	2
		229	3.89503e-20	2
		229.5	3.86595e-20	2
		230	3.83645e-20	2
		230.5	3.80655e-20	2
		231	3.77625e-20	2
		231.5	3.74555e-20	2
		232	3.71446e-20	2
		232.5	3.68298e-20	2
		233	3.65113e-20	2
		233.5	3.61891e-20	2
		234	3.58632e-20	2
		234.5	3.55337e-20	2
		235	3.52008e-20	2
		235.5	3.48643e-20	2
		236	3.45245e-20	2
		236.5	3.41814e-20	2
		237	3.3835e-20	2
		237.5	3.34854e-20	2
		238	3.31327e-20	2
		238.5	3.27769e-20	2
		239	3.24181e-20	2
		239.5	3.20564e-20	2
		240	3.16917e-20	2
		240.5	3.13242e-20	2
		241	3.09539e-20	2
		241.5	3.05809e-20	2
		242	3.02052e-20	2
		242.5	2.98269e-20	2
		243	2.9446e-20	2
		243.5	2.90625e-20	2
		244	2.86766e-20	2
		244.5	2.82882e-20	2
		245	2.78974e-20	2
		245.5	2.75042e-20	2
		246	2.71087e-20	2
		246.5	2.67109e-20	2
		247	2.63108e-20	2
		247.5	2.59086e-20	2
		248	2.55041e-20	2
		248.5	2.50975e-20	2
		249	2.46887e-20	2
		249.5	2.42778e-20	2
		250	2.38649e-20	2
		250.5	2.34499e-20	2
		251	2.30329e-20	2
		251.5	2.26139e-20	2
		252	2.21929e-20	2
		252.5	2.177e-20	2
		253	2.13451e-20	2
		253.5	2.09183e-20	2
		254	2.04896e-20	2
		254.5	2.0059e-20	2
		255	1.96265e-20	2
		255.5	1.91922e-20	2
		256	1.8756e-20	2
		256.5	1.83181e-20	2
		257	1.78783e-20	2
		257.5	1.74367e-20	2
		258	1.69933e-20	2
		258.5	1.65481e-20	2
		259	1.61012e-20	2
		259.5	1.56526e-20	2
		260	1.52021e-20	2
		260.5	1.475e-20	2
		261	1.42961e-20	2
		261.5	1.38405e-20	2
		262	1.33832e-20	2
		262.5	1.29243e-20	2.00001
		263	1.24643e-20	2.00013
		263.5	1.20046e-20	2.00059
		264	1.15471e-20	2.00175
		264.5	1.1094e-20	2.00411
		265	1.06485e-20	2.00841
		265.5	1.02146e-20	2.01575
		266	9.79797e-21	2.02771
		266.5	9.40605e-21	2.04664
		267	9.04905e-21	2.07603
		267.5	8.74101e-21	2.12109
		268	8.50152e-21	2.18979
		268.5	8.35827e-21	2.29441
		269	8.35109e-21	2.45432
		269.5	8.53843e-21	2.70074
		270	9.00807e-21	3.08536
		270.5	9.89548e-21	3.69658
		271	1.14166e-20	4.69158
		271.5	1.39297e-20	6.36309
		272	1.80576e-20	9.28869
		272.5	2.49512e-20	14.6932
		273	3.6906e-20	25.4266
		200	3.38247e-20	2
		200.5	3.37687e-20	2
		201	3.37115e-20	2
		201.5	3.36533e-20	2
		202	3.35939e-20	2
		202.5	3.35333e-20	2
		203	3.34715e-20	2
		203.5	3.34084e-20	2
		204	3.33438e-20	2
		204.5	3.32779e-20	2
		205	3.32105e-20	2
		205.5	3.31415e-20	2
		206	3.30709e-20	2
		206.5	3.29986e-20	2
		207	3.29247e-20	2
		207.5	3.28489e-20	2
		208	3.27712e-20	2
		208.5	3.26916e-20	2
		209	3.261e-20	2
		209.5	3.25264e-20	2
		210	3.24406e-20	2
		210.5	3.23527e-20	2
		211	3.22625e-20	2
		211.5	3.21699e-20	2
		212	3.2075e-20	2
		212.5	3.19777e-20	2
		213	3.18778e-20	2
		213.5	3.17754e-20	2
		214	3.16703e-20	2
		214.5	3.15626e-20	2
		215	3.14521e-20	2
		215.5	3.13389e-20	2
		216	3.12228e-20	2
		216.5	3.11039e-20	2
		217	3.0982e-20	2
		217.5	3.08572e-20	2
		218	3.07294e-20	2
		218.5	3.05986e-20	2
		219	3.04647e-20	2
		219.5	3.03277e-20	2
		220	3.01877e-20	2
		220.5	3.00445e-20	2
		221	2.98982e-20	2
		221.5	2.97487e-20	2
		222	2.95961e-20	2
		222.5	2.94403e-20	2
		223	2.92813e-20	2
		223.5	2.91192e-20	2
		224	2.89539e-20	2
		224.5	2.87855e-20	2
		225	2.8614e-20	2
		225.5	2.84393e-20	2
		226	2.82616e-20	2
		226.5	2.80808e-20	2
		227	2.78969e-20	2
		227.5	2.771e-20	2
		228	2.75201e-20	2
		228.5	2.73273e-20	2
		229	2.71315e-20	2
		229.5	2.69328e-20	2
		230	2.67313e-20	2
		230.5	2.6527e-20	2
		231	2.63199e-20	2
		231.5	2.61101e-20	2
		232	2.58976e-20	2
		232.5	2.56824e-20	2
		233	2.54646e-20	2
		233.5	2.52443e-20	2
		234	2.50215e-20	2
		234.5	2.47962e-20	2
		235	2.45684e-20	2
		235.5	2.43383e-20	2
		236	2.41059e-20	2
		236.5	2.38712e-20	2
		237	2.36342e-20	2
		237.5	2.3395e-20	2
		238	2.31537e-20	2
		238.5	2.29103e-20	2
		239	2.26647e-20	2
		239.5	2.24172e-20	2
		240	2.21676e-20	2
		240.5	2.19161e-20	2
		241	2.16627e-20	2
		241.5	2.14074e-20	2
		242	2.11502e-20	2
		242.5	2.08912e-20	2
		243	2.06305e-20	2
		243.5	2.0368e-20	2
		244	2.01037e-20	2
		244.5	1.98378e-20	2
		245	1.95702e-20	2
		245.5	1.9301e-20	2
		246	1.90302e-20	2
		246.5	1.87578e-20	2
		247	1.84839e-20	2
		247.5	1.82084e-20	2
		248	1.79314e-20	2
		248.5	1.76529e-20	2
		249	1.7373e-20	2
		249.5	1.70916e-20	2
		250	1.68087e-20	2
		250.5	1.65245e-20	2
		251	1.62389e-20	2
		251.5	1.59519e-20	2
		252	1.56635e-20	2
		252.5	1.53737e-20	2
		253	1.50827e-20	2
		253.5	1.47903e-20	2
		254	1.44966e-20	2
		254.5	1.42016e-20	2
		255	1.39053e-20	2
		255.5	1.36078e-20	2
		256	1.33089e-20	2
		256.5	1.30088e-20	2
		257	1.27075e-20	2
		257.5	1.24051e-20	2.00003
		258	1.21021e-20	2.00016
		258.5	1.1799e-20	2.00049
		259	1.14963e-20	2.00113
		259.5	1.1195e-20	2.00225
		260	1.08958e-20	2.00405
		260.5	1.05998e-20	2.0068
		261	1.03085e-20	2.01086
		261.5	1.00234e-20	2.01666
		262	9.74662e-21	2.0248
		262.5	9.48049e-21	2.03604
		263	9.22808e-21	2.05139
		263.5	8.99311e-21	2.07214
		264	8.78025e-21	2.10005
		264.5	8.59531e-21	2.13741
		265	8.44562e-21	2.18732
		265.5	8.34049e-21	2.25393
		266	8.29184e-21	2.34293
		266.5	8.31505e-21	2.46212
		267	8.43017e-21	2.62236
		267.5	8.66366e-21	2.83896
		268	9.05083e-21	3.13383
		268.5	9.63949e-21	3.53879
		269	1.04954e-20	4.10097
		269.5	1.17105e-20	4.89168
		270	1.34165e-20	6.02136
		270.5	1.58055e-20	7.66599
		271	1.91665e-20	10.1151
		271.5	2.39479e-20	13.8639
		272	3.08718e-20	19.7982
		272.5	4.11568e-20	29.5933
		273	5.69778e-20	46.6411
		200	2.57114e-20	2
		200.5	2.56702e-20	2
		201	2.56281e-20	2
		201.5	2.55852e-20	2
		202	2.55414e-20	2
		202.5	2.54967e-20	2
		203	2.54511e-20	2
		203.5	2.54044e-20	2
		204	2.53568e-20	2
		204.5	2.5308e-20	2
		205	2.52581e-20	2
		205.5	2.52071e-20	2
		206	2.51548e-20	2
		206.5	2.51013e-20	2
		207	2.50465e-20	2
		207.5	2.49903e-20	2
		208	2.49326e-20	2
		208.5	2.48736e-20	2
		209	2.4813e-20	2
		209.5	2.47508e-20	2
		210	2.46871e-20	2
		210.5	2.46217e-20	2
		211	2.45545e-20	2
		211.5	2.44857e-20	2
		212	2.4415e-20	2
		212.5	2.43424e-20	2
		213	2.4268e-20	2
		213.5	2.41916e-20	2
		214	2.41133e-20	2
		214.5	2.40329e-20	2
		215	2.39505e-20	2
		215.5	2.38659e-20	2
		216	2.37792e-20	2
		216.5	2.36903e-20	2
		217	2.35992e-20	2
		217.5	2.35059e-20	2
		218	2.34103e-20	2
		218.5	2.33125e-20	2
		219	2.32123e-20	2
		219.5	2.31098e-20	2
		220	2.30049e-20	2
		220.5	2.28977e-20	2
		221	2.27881e-20	2
		221.5	2.26761e-20	2
		222	2.25617e-20	2
		222.5	2.24449e-20	2
		223	2.23258e-20	2
		223.5	2.22042e-20	2
		224	2.20803e-20	2
		224.5	2.19539e-20	2
		225	2.18252e-20	2
		225.5	2.16942e-20	2
		226	2.15608e-20	2
		226.5	2.14251e-20	2
		227	2.1287e-20	2
		227.5	2.11467e-20	2
		228	2.10041e-20	2
		228.5	2.08593e-20	2
		229	2.07123e-20	2
		229.5	2.05631e-20	2
		230	2.04117e-20	2
		230.5	2.02582e-20	2
		231	2.01025e-20	2
		231.5	1.99449e-20	2
		232	1.97851e-20	2
		232.5	1.96234e-20	2
		233	1.94597e-20	2
		233.5	1.92941e-20	2
		234	1.91266e-20	2
		234.5	1.89572e-20	2
		235	1.8786e-20	2
		235.5	1.86129e-20	2
		236	1.84381e-20	2
		236.5	1.82616e-20	2
		237	1.80834e-20	2
		237.5	1.79035e-20	2
		238	1.77219e-20	2
		238.5	1.75388e-20	2
		239	1.73541e-20	2
		239.5	1.71679e-20	2
		240	1.69801e-20	2
		240.5	1.67909e-20	2
		241	1.66002e-20	2
		241.5	1.6408e-20	2
		242	1.62145e-20	2
		242.5	1.60196e-20	2
		243	1.58234e-20	2
		243.5	1.56258e-20	2
		244	1.5427e-20	2
		244.5	1.52268e-20	2
		245	1.50254e-20	2
		245.5	1.48228e-20	2
		246	1.46189e-20	2
		246.5	1.44139e-20	2
		247	1.42076e-20	2
		247.5	1.40002e-20	2
		248	1.37917e-20	2
		248.5	1.35821e-20	2
		249	1.33713e-20	2
		249.5	1.31594e-20	2
		250	1.29465e-20	2
		250.5	1.27325e-20	2
		251	1.25174e-20	2
		251.5	1.23013e-20	2
		252	1.20842e-20	2.00001
		252.5	1.18663e-20	2.00007
		253	1.1648e-20	2.00021
		253.5	1.14294e-20	2.00049
		254	1.12108e-20	2.00097
		254.5	1.09927e-20	2.00172
		255	1.07754e-20	2.00285
		255.5	1.05595e-20	2.00446
		256	1.03454e-20	2.00669
		256.5	1.01339e-20	2.00972
		257	9.92569e-21	2.01374
		257.5	9.7216e-21	2.01901
		258	9.52267e-21	2.02583
		258.5	9.33008e-21	2.03458
		259	9.1452e-21	2.04572
		259.5	8.96965e-21	2.05981
		260	8.80533e-21	2.07754
		260.5	8.65449e-21	2.09976
		261	8.51978e-21	2.12755
		261.5	8.40438e-21	2.16223
		262	8.31204e-21	2.20546
		262.5	8.24732e-21	2.25932
		263	8.21565e-21	2.32645
		263.5	8.22366e-21	2.41019
		264	8.27941e-21	2.51484
		264.5	8.39278e-21	2.64591
		265	8.57596e-21	2.8106
		265.5	8.84411e-21	3.01829
		266	9.21622e-21	3.28141
		266.5	9.7163e-21	3.61653
		267	1.0375e-20	4.04605
		267.5	1.12317e-20	4.60055
		268	1.2338e-20	5.32242
		268.5	1.37619e-20	6.27127
		269	1.55944e-20	7.53235
		269.5	1.79595e-20	9.22995
		270	2.10291e-20	11.5492
		270.5	2.50461e-20	14.7725
		271	3.03626e-20	19.3434
		271.5	3.75019e-20	25.9807
		272	4.72679e-20	35.8954
		272.5	6.09425e-20	51.2214
		273	8.06641e-20	75.9311
		200	2.06164e-20	2
		200.5	2.05842e-20	2
		201	2.05515e-20	2
		201.5	2.0518e-20	2
		202	2.04839e-20	2
		202.5	2.0449e-20	2
		203	2.04134e-20	2
		203.5	2.03769e-20	2
		204	2.03397e-20	2
		204.5	2.03016e-20	2
		205	2.02625e-20	2
		205.5	2.02226e-20	2
		206	2.01817e-20	2
		206.5	2.01397e-20	2
		207	2.00967e-20	2
		207.5	2.00527e-20	2
		208	2.00074e-20	2
		208.5	1.99611e-20	2
		209	1.99135e-20	2
		209.5	1.98647e-20	2
		210	1.98146e-20	2
		210.5	1.97631e-20	2
		211	1.97103e-20	2
		211.5	1.96561e-20	2
		212	1.96004e-20	2
		212.5	1.95433e-20	2
		213	1.94847e-20	2
		213.5	1.94245e-20	2
		214	1.93627e-20	2
		214.5	1.92993e-20	2
		215	1.92342e-20	2
		215.5	1.91675e-20	2
		216	1.9099e-20	2
		216.5	1.90288e-20	2
		217	1.89568e-20	2
		217.5	1.88831e-20	2
		218	1.88075e-20	2
		218.5	1.87301e-20	2
		219	1.86509e-20	2
		219.5	1.85698e-20	2
		220	1.84868e-20	2
		220.5	1.8402e-20	2
		221	1.83152e-20	2
		221.5	1.82265e-20	2
		222	1.81359e-20	2
		222.5	1.80434e-20	2
		223	1.7949e-20	2
		223.5	1.78527e-20	2
		224	1.77544e-20	2
		224.5	1.76543e-20	2
		225	1.75523e-20	2
		225.5	1.74484e-20	2
		226	1.73426e-20	2
		226.5	1.72349e-20	2
		227	1.71254e-20	2
		227.5	1.70141e-20	2
		228	1.6901e-20	2
		228.5	1.6786e-20	2
		229	1.66693e-20	2
		229.5	1.65509e-20	2
		230	1.64307e-20	2
		230.5	1.63089e-20	2
		231	1.61853e-20	2
		231.5	1.60601e-20	2
		232	1.59333e-20	2
		232.5	1.58048e-20	2
		233	1.56748e-20	2
		233.5	1.55433e-20	2
		234	1.54102e-20	2
		234.5	1.52756e-20	2
		235	1.51396e-20	2
		235.5	1.50021e-20	2
		236	1.48632e-20	2
		236.5	1.47229e-20	2
		237	1.45813e-20	2
		237.5	1.44383e-20	2
		238	1.42941e-20	2
		238.5	1.41485e-20	2
		239	1.40017e-20	2
		239.5	1.38537e-20	2
		240	1.37044e-20	2
		240.5	1.3554e-20	2
		241	1.34024e-20	2
		241.5	1.32496e-20	2
		242	1.30958e-20	2
		242.5	1.29408e-20	2
		243	1.27848e-20	2
		243.5	1.26277e-20	2
		244	1.24696e-20	2
		244.5	1.23104e-20	2
		245	1.21503e-20	2
		245.5	1.19891e-20	2
		246	1.1827e-20	2
		246.5	1.16639e-20	2
		247	1.15e-20	2.00003
		247.5	1.13355e-20	2.00009
		248	1.11704e-20	2.00023
		248.5	1.10049e-20	2.00047
		249	1.08393e-20	2.00085
		249.5	1.06737e-20	2.00142
		250	1.05085e-20	2.00223
		250.5	1.03438e-20	2.00333
		251	1.01799e-20	2.00482
		251.5	1.00173e-20	2.00676
		252	9.85621e-21	2.00926
		252.5	9.69716e-21	2.01244
		253	9.5406e-21	2.01643
		253.5	9.38707e-21	2.02141
		254	9.23718e-21	2.02754
		254.5	9.09162e-21	2.03507
		255	8.95117e-21	2.04425
		255.5	8.81673e-21	2.0554
		256	8.6893e-21	2.06888
		256.5	8.57003e-21	2.08512
		257	8.46025e-21	2.10465
		257.5	8.36146e-21	2.12807
		258	8.2754e-21	2.15613
		258.5	8.20405e-21	2.18969
		259	8.14972e-21	2.22981
		259.5	8.11507e-21	2.27776
		260	8.10321e-21	2.33506
		260.5	8.11776e-21	2.40358
		261	8.16293e-21	2.48557
		261.5	8.2437e-21	2.5838
		262	8.36594e-21	2.70166
		262.5	8.53659e-21	2.84336
		263	8.76393e-21	3.01412
		263.5	9.05789e-21	3.22045
		264	9.43037e-21	3.47055
		264.5	9.89584e-21	3.7748
		265	1.04719e-20	4.14647
		265.5	1.11801e-20	4.6026
		266	1.20473e-20	5.16531
		266.5	1.31066e-20	5.8636
		267	1.44e-20	6.73585
		267.5	1.59806e-20	7.83349
		268	1.79167e-20	9.22627
		268.5	2.02968e-20	11.0102
		269	2.32375e-20	13.3192
		269.5	2.68944e-20	16.3439
		270	3.14785e-20	20.3605
		270.5	3.72814e-20	25.7779
		271	4.47144e-20	33.2173
		271.5	5.43713e-20	43.6492
		272	6.71342e-20	58.6408
		272.5	8.43553e-20	80.8232
		273	1.08189e-19	114.822
		200	1.71161e-20	2
		200.5	1.70902e-20	2
		201	1.70636e-20	2
		201.5	1.70366e-20	2
		202	1.7009e-20	2
		202.5	1.69807e-20	2
		203	1.69518e-20	2
		203.5	1.69223e-20	2
		204	1.68921e-20	2
		204.5	1.68612e-20	2
		205	1.68295e-20	2
		205.5	1.67971e-20	2
		206	1.67638e-20	2
		206.5	1.67297e-20	2
		207	1.66948e-20	2
		207.5	1.66589e-20	2
		208	1.66221e-20	2
		208.5	1.65843e-20	2
		209	1.65456e-20	2
		209.5	1.65058e-20	2
		210	1.64649e-20	2
		210.5	1.6423e-20	2
		211	1.63799e-20	2
		211.5	1.63356e-20	2
		212	1.62902e-20	2
		212.5	1.62435e-20	2
		213	1.61956e-20	2
		213.5	1.61463e-20	2
		214	1.60958e-20	2
		214.5	1.60439e-20	2
		215	1.59907e-20	2
		215.5	1.5936e-20	2
		216	1.588e-20	2
		216.5	1.58225e-20	2
		217	1.57635e-20	2
		217.5	1.57031e-20	2
		218	1.56411e-20	2
		218.5	1.55777e-20	2
		219	1.55127e-20	2
		219.5	1.54462e-20	2
		220	1.53781e-20	2
		220.5	1.53084e-20	2
		221	1.52372e-20	2
		221.5	1.51644e-20	2
		222	1.509e-20	2
		222.5	1.5014e-20	2
		223	1.49365e-20	2
		223.5	1.48573e-20	2
		224	1.47766e-20	2
		224.5	1.46943e-20	2
		225	1.46104e-20	2
		225.5	1.4525e-20	2
		226	1.4438e-20	2
		226.5	1.43495e-20	2
		227	1.42594e-20	2
		227.5	1.41679e-20	2
		228	1.40748e-20	2
		228.5	1.39803e-20	2
		229	1.38842e-20	2
		229.5	1.37868e-20	2
		230	1.36879e-20	2
		230.5	1.35876e-20	2
		231	1.34859e-20	2
		231.5	1.33828e-20	2
		232	1.32784e-20	2
		232.5	1.31726e-20	2
		233	1.30656e-20	2
		233.5	1.29573e-20	2
		234	1.28477e-20	2
		234.5	1.27369e-20	2
		235	1.26248e-20	2
		235.5	1.25116e-20	2
		236	1.23972e-20	2
		236.5	1.22816e-20	2
		237	1.2165e-20	2
		237.5	1.20472e-20	2
		238	1.19283e-20	2
		238.5	1.18084e-20	2
		239	1.16874e-20	2
		239.5	1.15655e-20	2
		240	1.14425e-20	2
		240.5	1.13185e-20	2
		241	1.11936e-20	2
		241.5	1.10677e-20	2.00001
		242	1.09411e-20	2.00003
		242.5	1.08137e-20	2.0001
		243	1.06857e-20	2.00022
		243.5	1.05573e-20	2.00041
		244	1.04285e-20	2.00072
		244.5	1.02995e-20	2.00115
		245	1.01704e-20	2.00175
		245.5	1.00415e-20	2.00256
		246	9.91296e-21	2.00362
		246.5	9.78492e-21	2.00497
		247	9.65763e-21	2.00669
		247.5	9.53136e-21	2.00884
		248	9.40638e-21	2.01148
		248.5	9.28301e-21	2.01472
		249	9.16157e-21	2.01864
		249.5	9.04245e-21	2.02336
		250	8.92604e-21	2.02902
		250.5	8.81282e-21	2.03577
		251	8.70329e-21	2.04377
		251.5	8.59801e-21	2.05322
		252	8.4976e-21	2.06435
		252.5	8.40277e-21	2.07743
		253	8.31429e-21	2.09276
		253.5	8.23303e-21	2.11068
		254	8.15997e-21	2.1316
		254.5	8.09619e-21	2.15599
		255	8.04292e-21	2.18439
		255.5	8.00156e-21	2.21743
		256	7.97364e-21	2.25586
		256.5	7.96095e-21	2.30054
		257	7.96547e-21	2.35247
		257.5	7.98949e-21	2.41286
		258	8.03559e-21	2.48309
		258.5	8.10673e-21	2.56483
		259	8.2063e-21	2.66005
		259.5	8.33821e-21	2.77108
		260	8.50694e-21	2.90071
		260.5	8.71771e-21	3.05232
		261	8.97656e-21	3.22992
		261.5	9.29053e-21	3.43841
		262	9.66788e-21	3.68372
		262.5	1.01183e-20	3.97311
		263	1.06533e-20	4.3155
		263.5	1.12864e-20	4.72189
		264	1.20339e-20	5.20598
		264.5	1.29154e-20	5.78489
		265	1.39543e-20	6.48024
		265.5	1.51793e-20	7.31946
		266	1.66255e-20	8.33773
		266.5	1.83362e-20	9.5805
		267	2.03651e-20	11.1072
		267.5	2.27801e-20	12.996
		268	2.56667e-20	15.3519
		268.5	2.9135e-20	18.3163
		269	3.33276e-20	22.0838
		269.5	3.84323e-20	26.9257
		270	4.46996e-20	33.2271
		270.5	5.24693e-20	41.5459
		271	6.22117e-20	52.7086
		271.5	7.4591e-20	67.9712
		272	9.05688e-20	89.2996
		272.5	1.11577e-19	119.878
		273	1.39823e-19	165.074
		200	1.45619e-20	2
		200.5	1.45403e-20	2
		201	1.45183e-20	2
		201.5	1.44958e-20	2
		202	1.44729e-20	2
		202.5	1.44494e-20	2
		203	1.44254e-20	2
		203.5	1.44008e-20	2
		204	1.43757e-20	2
		204.5	1.43499e-20	2
		205	1.43235e-20	2
		205.5	1.42965e-20	2
		206	1.42688e-20	2
		206.5	1.42403e-20	2
		207	1.42111e-20	2
		207.5	1.41812e-20	2
		208	1.41504e-20	2
		208.5	1.41189e-20	2
		209	1.40865e-20	2
		209.5	1.40532e-20	2
		210	1.4019e-20	2
		210.5	1.39839e-20	2
		211	1.39478e-20	2
		211.5	1.39107e-20	2
		212	1.38726e-20	2
		212.5	1.38335e-20	2
		213	1.37933e-20	2
		213.5	1.3752e-20	2
		214	1.37096e-20	2
		214.5	1.3666e-20	2
		215	1.36213e-20	2
		215.5	1.35754e-20	2
		216	1.35283e-20	2
		216.5	1.348e-20	2
		217	1.34304e-20	2
		217.5	1.33796e-20	2
		218	1.33275e-20	2
		218.5	1.32741e-20	2
		219	1.32194e-20	2
		219.5	1.31634e-20	2
		220	1.31061e-20	2
		220.5	1.30474e-20	2
		221	1.29875e-20	2
		221.5	1.29261e-20	2
		222	1.28635e-20	2
		222.5	1.27994e-20	2
		223	1.27341e-20	2
		223.5	1.26674e-20	2
		224	1.25993e-20	2
		224.5	1.25299e-20	2
		225	1.24592e-20	2
		225.5	1.23872e-20	2
		226	1.23138e-20	2
		226.5	1.22391e-20	2
		227	1.21631e-20	2
		227.5	1.20859e-20	2
		228	1.20074e-20	2
		228.5	1.19276e-20	2
		229	1.18465e-20	2
		229.5	1.17642e-20	2
		230	1.16808e-20	2
		230.5	1.15961e-20	2
		231	1.15102e-20	2
		231.5	1.14232e-20	2
		232	1.1335e-20	2
		232.5	1.12457e-20	2
		233	1.11553e-20	2
		233.5	1.10638e-20	2
		234	1.09713e-20	2
		234.5	1.08776e-20	2
		235	1.0783e-20	2
		235.5	1.06873e-20	2
		236	1.05907e-20	2
		236.5	1.04931e-20	2.00001
		237	1.03946e-20	2.00003
		237.5	1.02954e-20	2.00008
		238	1.01954e-20	2.00018
		238.5	1.00948e-20	2.00033
		239	9.99375e-21	2.00056
		239.5	9.89225e-21	2.00089
		240	9.79046e-21	2.00134
		240.5	9.6885e-21	2.00194
		241	9.5865e-21	2.00271
		241.5	9.4846e-21	2.00369
		242	9.38297e-21	2.00492
		242.5	9.28176e-21	2.00644
		243	9.18117e-21	2.00829
		243.5	9.08138e-21	2.01053
		244	8.98263e-21	2.01323
		244.5	8.88512e-21	2.01644
		245	8.78913e-21	2.02024
		245.5	8.69493e-21	2.02472
		246	8.60281e-21	2.02998
		246.5	8.51311e-21	2.03612
		247	8.42618e-21	2.04326
		247.5	8.34241e-21	2.05155
		248	8.26223e-21	2.06114
		248.5	8.18612e-21	2.0722
		249	8.11458e-21	2.08494
		249.5	8.04818e-21	2.09957
		250	7.98754e-21	2.11636
		250.5	7.93335e-21	2.13558
		251	7.88636e-21	2.15758
		251.5	7.8474e-21	2.18272
		252	7.8174e-21	2.21143
		252.5	7.79739e-21	2.24419
		253	7.78849e-21	2.28156
		253.5	7.79196e-21	2.32418
		254	7.80921e-21	2.37276
		254.5	7.84182e-21	2.42815
		255	7.89152e-21	2.4913
		255.5	7.96029e-21	2.56334
		256	8.05032e-21	2.64555
		256.5	8.16411e-21	2.73941
		257	8.30444e-21	2.84667
		257.5	8.47447e-21	2.96935
		258	8.67781e-21	3.10981
		258.5	8.91851e-21	3.27083
		259	9.20123e-21	3.45569
		259.5	9.53129e-21	3.66823
		260	9.91477e-21	3.91303
		260.5	1.03587e-20	4.19555
		261	1.08712e-20	4.5223
		261.5	1.14616e-20	4.90107
		262	1.21409e-20	5.34131
		262.5	1.29219e-20	5.85442
		263	1.38196e-20	6.45432
		263.5	1.48517e-20	7.15805
		264	1.60393e-20	7.98662
		264.5	1.74074e-20	8.96611
		265	1.89861e-20	10.1291
		265.5	2.08117e-20	11.5165
		266	2.29283e-20	13.1803
		266.5	2.539e-20	15.1872
		267	2.82634e-20	17.6229
		267.5	3.16316e-20	20.5998
		268	3.55987e-20	24.266
		268.5	4.02973e-20	28.8191
		269	4.58971e-20	34.5271
		269.5	5.26191e-20	41.7582
		270	6.07544e-20	51.0267
		270.5	7.06924e-20	63.0646
		271	8.29635e-20	78.9355
		271.5	9.83041e-20	100.221
		272	1.17759e-19	129.338
		272.5	1.42852e-19	170.09
		273	1.75864e-19	228.692
		200	1.26153e-20	2
		200.5	1.2597e-20	2
		201	1.25784e-20	2
		201.5	1.25594e-20	2
		202	1.25399e-20	2
		202.5	1.252e-20	2
		203	1.24997e-20	2
		203.5	1.24788e-20	2
		204	1.24575e-20	2
		204.5	1.24356e-20	2
		205	1.24132e-20	2
		205.5	1.23902e-20	2
		206	1.23666e-20	2
		206.5	1.23424e-20	2
		207	1.23176e-20	2
		207.5	1.2292e-20	2
		208	1.22659e-20	2
		208.5	1.2239e-20	2
		209	1.22113e-20	2
		209.5	1.21829e-20	2
		210	1.21538e-20	2
		210.5	1.21238e-20	2
		211	1.20929e-20	2
		211.5	1.20613e-20	2
		212	1.20287e-20	2
		212.5	1.19953e-20	2
		213	1.19609e-20	2
		213.5	1.19256e-20	2
		214	1.18893e-20	2
		214.5	1.1852e-20	2
		215	1.18138e-20	2
		215.5	1.17745e-20	2
		216	1.17341e-20	2
		216.5	1.16927e-20	2
		217	1.16502e-20	2
		217.5	1.16067e-20	2
		218	1.1562e-20	2
		218.5	1.15162e-20	2
		219	1.14693e-20	2
		219.5	1.14213e-20	2
		220	1.13721e-20	2
		220.5	1.13218e-20	2
		221	1.12703e-20	2
		221.5	1.12176e-20	2
		222	1.11638e-20	2
		222.5	1.11088e-20	2
		223	1.10527e-20	2
		223.5	1.09954e-20	2
		224	1.09369e-20	2
		224.5	1.08773e-20	2
		225	1.08165e-20	2
		225.5	1.07546e-20	2
		226	1.06915e-20	2
		226.5	1.06273e-20	2
		227	1.0562e-20	2
		227.5	1.04956e-20	2
		228	1.0428e-20	2
		228.5	1.03594e-20	2
		229	1.02897e-20	2
		229.5	1.02189e-20	2
		230	1.01471e-20	2
		230.5	1.00743e-20	2
		231	1.00004e-20	2
		231.5	9.92552e-21	2.00001
		232	9.84973e-21	2.00002
		232.5	9.77307e-21	2.00006
		233	9.69561e-21	2.00013
		233.5	9.61741e-21	2.00025
		234	9.53855e-21	2.00042
		234.5	9.4591e-21	2.00067
		235	9.37915e-21	2.001
		235.5	9.2988e-21	2.00144
		236	9.21813e-21	2.00201
		236.5	9.13726e-21	2.00272
		237	9.05629e-21	2.00361
		237.5	8.97535e-21	2.00471
		238	8.89456e-21	2.00604
		238.5	8.81406e-21	2.00765
		239	8.73401e-21	2.00956
		239.5	8.65455e-21	2.01183
		240	8.57587e-21	2.0145
		240.5	8.49814e-21	2.01762
		241	8.42157e-21	2.02127
		241.5	8.34637e-21	2.02549
		242	8.27276e-21	2.03038
		242.5	8.201e-21	2.036
		243	8.13136e-21	2.04245
		243.5	8.06412e-21	2.04984
		244	7.99959e-21	2.05827
		244.5	7.93813e-21	2.06787
		245	7.88009e-21	2.07879
		245.5	7.82587e-21	2.09118
		246	7.77591e-21	2.10521
		246.5	7.73068e-21	2.12108
		247	7.69068e-21	2.13902
		247.5	7.65648e-21	2.15925
		248	7.62868e-21	2.18207
		248.5	7.60794e-21	2.20777
		249	7.595e-21	2.2367
		249.5	7.59064e-21	2.26925
		250	7.59572e-21	2.30585
		250.5	7.61122e-21	2.347
		251	7.63817e-21	2.39325
		251.5	7.67773e-21	2.44522
		252	7.73117e-21	2.50363
		252.5	7.79988e-21	2.56928
		253	7.88544e-21	2.64309
		253.5	7.98954e-21	2.7261
		254	8.1141e-21	2.81948
		254.5	8.26125e-21	2.92461
		255	8.43333e-21	3.04302
		255.5	8.63299e-21	3.1765
		256	8.86317e-21	3.3271
		256.5	9.12718e-21	3.49719
		257	9.42874e-21	3.6895
		257.5	9.77203e-21	3.90719
		258	1.01618e-20	4.15397
		258.5	1.06033e-20	4.43411
		259	1.11027e-20	4.75267
		259.5	1.16669e-20	5.11556
		260	1.23038e-20	5.52974
		260.5	1.30225e-20	6.00347
		261	1.38333e-20	6.54654
		261.5	1.47483e-20	7.17065
		262	1.57815e-20	7.88981
		262.5	1.69491e-20	8.7209
		263	1.827e-20	9.68434
		263.5	1.97665e-20	10.805
		264	2.14649e-20	12.1134
		264.5	2.33964e-20	13.6469
		265	2.55981e-20	15.4522
		265.5	2.81147e-20	17.5873
		266	3.10002e-20	20.1253
		266.5	3.43201e-20	23.1592
		267	3.81549e-20	26.8078
		267.5	4.26039e-20	31.2249
		268	4.77912e-20	36.6115
		268.5	5.38726e-20	43.2332
		269	6.10469e-20	51.446
		269.5	6.95695e-20	61.7331
		270	7.97739e-20	74.7606
		270.5	9.21011e-20	91.4636
		271	1.07144e-19	113.179
		271.5	1.25714e-19	141.86
		272	1.48946e-19	180.433
		272.5	1.7846e-19	233.406
		273	2.1664e-19	307.949
		200	1.10825e-20	2
		200.5	1.10669e-20	2
		201	1.10508e-20	2
		201.5	1.10345e-20	2
		202	1.10177e-20	2
		202.5	1.10006e-20	2
		203	1.09831e-20	2
		203.5	1.09651e-20	2
		204	1.09467e-20	2
		204.5	1.09278e-20	2
		205	1.09085e-20	2
		205.5	1.08886e-20	2
		206	1.08683e-20	2
		206.5	1.08474e-20	2
		207	1.08259e-20	2
		207.5	1.08038e-20	2
		208	1.07812e-20	2
		208.5	1.07579e-20	2
		209	1.0734e-20	2
		209.5	1.07094e-20	2
		210	1.06841e-20	2
		210.5	1.06581e-20	2
		211	1.06314e-20	2
		211.5	1.0604e-20	2
		212	1.05757e-20	2
		212.5	1.05467e-20	2
		213	1.05169e-20	2
		213.5	1.04862e-20	2
		214	1.04547e-20	2
		214.5	1.04223e-20	2
		215	1.03891e-20	2
		215.5	1.03549e-20	2
		216	1.03199e-20	2
		216.5	1.02839e-20	2
		217	1.02469e-20	2
		217.5	1.0209e-20	2
		218	1.01701e-20	2
		218.5	1.01303e-20	2
		219	1.00895e-20	2
		219.5	1.00476e-20	2
		220	1.00048e-20	2
		220.5	9.96098e-21	2
		221	9.91612e-21	2
		221.5	9.87025e-21	2
		222	9.82336e-21	2
		222.5	9.77545e-21	2
		223	9.72651e-21	2
		223.5	9.67655e-21	2
		224	9.62557e-21	2
		224.5	9.57358e-21	2
		225	9.52057e-21	2
		225.5	9.46656e-21	2
		226	9.41155e-21	2
		226.5	9.35555e-21	2
		227	9.29862e-21	2.00001
		227.5	9.24078e-21	2.00004
		228	9.18208e-21	2.0001
		228.5	9.12257e-21	2.00018
		229	9.0623e-21	2.00031
		229.5	9.00132e-21	2.00049
		230	8.9397e-21	2.00073
		230.5	8.87751e-21	2.00105
		231	8.8148e-21	2.00147
		231.5	8.75167e-21	2.00199
		232	8.68818e-21	2.00265
		232.5	8.62443e-21	2.00345
		233	8.5605e-21	2.00442
		233.5	8.49651e-21	2.00558
		234	8.43255e-21	2.00697
		234.5	8.36874e-21	2.00861
		235	8.3052e-21	2.01053
		235.5	8.24206e-21	2.01277
		236	8.17946e-21	2.01537
		236.5	8.11755e-21	2.01838
		237	8.05649e-21	2.02184
		237.5	7.99645e-21	2.0258
		238	7.9376e-21	2.03033
		238.5	7.88016e-21	2.03548
		239	7.82432e-21	2.04134
		239.5	7.77031e-21	2.04798
		240	7.71836e-21	2.05548
		240.5	7.66875e-21	2.06394
		241	7.62174e-21	2.07346
		241.5	7.57763e-21	2.08417
		242	7.53675e-21	2.09618
		242.5	7.49943e-21	2.10965
		243	7.46604e-21	2.12472
		243.5	7.437e-21	2.14157
		244	7.41271e-21	2.16038
		244.5	7.39366e-21	2.18138
		245	7.38035e-21	2.20479
		245.5	7.37331e-21	2.23087
		246	7.37315e-21	2.25992
		246.5	7.38048e-21	2.29224
		247	7.39601e-21	2.3282
		247.5	7.4205e-21	2.36819
		248	7.45475e-21	2.41265
		248.5	7.49966e-21	2.46208
		249	7.55619e-21	2.51702
		249.5	7.62541e-21	2.57809
		250	7.70848e-21	2.64598
		250.5	7.80666e-21	2.72146
		251	7.92134e-21	2.80539
		251.5	8.05403e-21	2.89876
		252	8.20643e-21	3.00266
		252.5	8.38037e-21	3.11834
		253	8.57787e-21	3.2472
		253.5	8.8012e-21	3.39084
		254	9.05282e-21	3.55106
		254.5	9.3355e-21	3.72992
		255	9.6523e-21	3.92976
		255.5	1.00066e-20	4.15328
		256	1.04022e-20	4.40353
		256.5	1.08434e-20	4.68405
		257	1.13349e-20	4.9989
		257.5	1.1882e-20	5.35277
		258	1.24909e-20	5.75109
		258.5	1.31681e-20	6.20018
		259	1.39215e-20	6.70738
		259.5	1.47597e-20	7.28129
		260	1.56928e-20	7.93201
		260.5	1.67319e-20	8.67141
		261	1.78902e-20	9.51356
		261.5	1.91825e-20	10.4751
		262	2.06263e-20	11.576
		262.5	2.22414e-20	12.8401
		263	2.40512e-20	14.296
		263.5	2.6083e-20	15.9786
		264	2.83688e-20	17.9302
		264.5	3.09465e-20	20.2026
		265	3.3861e-20	22.8599
		265.5	3.71661e-20	25.9812
		266	4.09262e-20	29.666
		266.5	4.52194e-20	34.0393
		267	5.01411e-20	39.2601
		267.5	5.58081e-20	45.5327
		268	6.23652e-20	53.1218
		268.5	6.99938e-20	62.3741
		269	7.89225e-20	73.75
		269.5	8.94437e-20	87.8682
		270	1.01935e-19	105.573
		270.5	1.16892e-19	128.033
		271	1.34973e-19	156.902
		271.5	1.57068e-19	194.556
		272	1.84407e-19	244.501
		272.5	2.18719e-19	312.036
		273	2.62505e-19	405.42
		200	9.84447e-21	2
		200.5	9.83083e-21	2
		201	9.81689e-21	2
		201.5	9.80263e-21	2
		202	9.78804e-21	2
		202.5	9.77311e-21	2
		203	9.75781e-21	2
		203.5	9.74214e-21	2
		204	9.72608e-21	2
		204.5	9.70961e-21	2
		205	9.69271e-21	2
		205.5	9.67537e-21	2
		206	9.65756e-21	2
		206.5	9.63928e-21	2
		207	9.6205e-21	2
		207.5	9.6012e-21	2
		208	9.58137e-21	2
		208.5	9.56098e-21	2
		209	9.54003e-21	2
		209.5	9.51848e-21	2
		210	9.49632e-21	2
		210.5	9.47353e-21	2
		211	9.45009e-21	2
		211.5	9.42599e-21	2
		212	9.40121e-21	2
		212.5	9.37572e-21	2
		213	9.34952e-21	2
		213.5	9.32258e-21	2
		214	9.29488e-21	2
		214.5	9.26642e-21	2
		215	9.23718e-21	2
		215.5	9.20714e-21	2
		216	9.17628e-21	2
		216.5	9.1446e-21	2
		217	9.11209e-21	2
		217.5	9.07873e-21	2
		218	9.04451e-21	2
		218.5	9.00942e-21	2
		219	8.97345e-21	2
		219.5	8.9366e-21	2
		220	8.89886e-21	2
		220.5	8.86023e-21	2
		221	8.82069e-21	2
		221.5	8.78026e-21	2
		222	8.73895e-21	2.00001
		222.5	8.69678e-21	2.00003
		223	8.65379e-21	2.00007
		223.5	8.60998e-21	2.00013
		224	8.56541e-21	2.00022
		224.5	8.52009e-21	2.00035
		225	8.47408e-21	2.00053
		225.5	8.42741e-21	2.00077
		226	8.38013e-21	2.00108
		226.5	8.33229e-21	2.00147
		227	8.28394e-21	2.00195
		227.5	8.23515e-21	2.00255
		228	8.18598e-21	2.00326
		228.5	8.13649e-21	2.00412
		229	8.08677e-21	2.00514
		229.5	8.0369e-21	2.00634
		230	7.98695e-21	2.00775
		230.5	7.93703e-21	2.00939
		231	7.88723e-21	2.01128
		231.5	7.83765e-21	2.01347
		232	7.78842e-21	2.01598
		232.5	7.73964e-21	2.01884
		233	7.69145e-21	2.02211
		233.5	7.644e-21	2.02581
		234	7.59741e-21	2.03001
		234.5	7.55185e-21	2.03474
		235	7.50749e-21	2.04007
		235.5	7.4645e-21	2.04606
		236	7.42307e-21	2.05278
		236.5	7.38341e-21	2.0603
		237	7.34573e-21	2.0687
		237.5	7.31025e-21	2.07808
		238	7.27724e-21	2.08852
		238.5	7.24695e-21	2.10014
		239	7.21965e-21	2.11305
		239.5	7.19566e-21	2.12738
		240	7.1753e-21	2.14327
		240.5	7.1589e-21	2.16087
		241	7.14684e-21	2.18035
		241.5	7.13952e-21	2.2019
		242	7.13735e-21	2.22572
		242.5	7.1408e-21	2.25203
		243	7.15036e-21	2.28107
		243.5	7.16655e-21	2.31312
		244	7.18995e-21	2.34848
		244.5	7.22116e-21	2.38747
		245	7.26085e-21	2.43046
		245.5	7.30972e-21	2.47783
		246	7.36855e-21	2.53005
		246.5	7.43818e-21	2.58759
		247	7.51949e-21	2.65099
		247.5	7.61348e-21	2.72086
		248	7.7212e-21	2.79787
		248.5	7.8438e-21	2.88275
		249	7.98255e-21	2.97633
		249.5	8.13879e-21	3.07953
		250	8.31403e-21	3.19339
		250.5	8.50988e-21	3.31904
		251	8.72813e-21	3.45777
		251.5	8.97072e-21	3.61103
		252	9.23979e-21	3.78044
		252.5	9.53768e-21	3.96781
		253	9.86698e-21	4.1752
		253.5	1.02305e-20	4.40494
		254	1.06314e-20	4.65965
		254.5	1.10732e-20	4.9423
		255	1.15597e-20	5.25629
		255.5	1.20952e-20	5.60546
		256	1.26845e-20	5.99423
		256.5	1.33327e-20	6.42762
		257	1.4046e-20	6.91143
		257.5	1.48308e-20	7.45231
		258	1.56947e-20	8.05793
		258.5	1.66461e-20	8.73719
		259	1.76944e-20	9.5004
		259.5	1.88504e-20	10.3596
		260	2.01262e-20	11.3288
		260.5	2.15358e-20	12.4246
		261	2.3095e-20	13.6663
		261.5	2.4822e-20	15.077
		262	2.67378e-20	16.6838
		262.5	2.88666e-20	18.5195
		263	3.12365e-20	20.6231
		263.5	3.38802e-20	23.0415
		264	3.68362e-20	25.832
		264.5	4.01495e-20	29.0639
		265	4.38735e-20	32.8227
		265.5	4.80718e-20	37.2136
		266	5.28204e-20	42.3676
		266.5	5.82109e-20	48.449
		267	6.43544e-20	55.6652
		267.5	7.13866e-20	64.2807
		268	7.94748e-20	74.6361
		268.5	8.88271e-20	87.1746
		269	9.97043e-20	102.479
		269.5	1.12438e-19	121.328
		270	1.27452e-19	144.771
		270.5	1.45299e-19	174.25
		271	1.66707e-19	211.777
		271.5	1.92651e-19	260.215
		272	2.24459e-19	323.725
		272.5	2.63982e-19	408.503
		273	3.13852e-19	524.033
		200	8.82379e-21	2
		200.5	8.8118e-21	2
		201	8.79953e-21	2
		201.5	8.78698e-21	2
		202	8.77414e-21	2
		202.5	8.76099e-21	2
		203	8.74752e-21	2
		203.5	8.73371e-21	2
		204	8.71954e-21	2
		204.5	8.70501e-21	2
		205	8.6901e-21	2
		205.5	8.67479e-21	2
		206	8.65907e-21	2
		206.5	8.64292e-21	2
		207	8.62632e-21	2
		207.5	8.60926e-21	2
		208	8.59173e-21	2
		208.5	8.57369e-21	2
		209	8.55515e-21	2
		209.5	8.53607e-21	2
		210	8.51645e-21	2
		210.5	8.49626e-21	2
		211	8.4755e-21	2
		211.5	8.45413e-21	2
		212	8.43216e-21	2
		212.5	8.40956e-21	2
		213	8.38631e-21	2
		213.5	8.36241e-21	2
		214	8.33783e-21	2
		214.5	8.31256e-21	2
		215	8.2866e-21	2
		215.5	8.25991e-21	2
		216	8.2325e-21	2
		216.5	8.20436e-21	2
		217	8.17549e-21	2.00001
		217.5	8.14589e-21	2.00002
		218	8.11557e-21	2.00005
		218.5	8.08455e-21	2.00009
		219	8.05284e-21	2.00016
		219.5	8.02046e-21	2.00026
		220	7.98742e-21	2.0004
		220.5	7.95375e-21	2.00058
		221	7.91948e-21	2.00081
		221.5	7.88462e-21	2.0011
		222	7.84923e-21	2.00147
		222.5	7.81332e-21	2.00191
		223	7.77695e-21	2.00245
		223.5	7.74015e-21	2.0031
		224	7.70297e-21	2.00386
		224.5	7.66547e-21	2.00476
		225	7.62771e-21	2.00581
		225.5	7.58974e-21	2.00703
		226	7.55164e-21	2.00845
		226.5	7.51347e-21	2.01007
		227	7.47531e-21	2.01192
		227.5	7.43725e-21	2.01404
		228	7.39937e-21	2.01645
		228.5	7.36178e-21	2.01917
		229	7.32456e-21	2.02225
		229.5	7.28785e-21	2.02571
		230	7.25174e-21	2.0296
		230.5	7.21636e-21	2.03395
		231	7.18186e-21	2.03882
		231.5	7.14836e-21	2.04426
		232	7.11603e-21	2.05031
		232.5	7.08501e-21	2.05705
		233	7.05549e-21	2.06452
		233.5	7.02764e-21	2.07281
		234	7.00166e-21	2.08198
		234.5	6.97775e-21	2.09213
		235	6.95614e-21	2.10334
		235.5	6.93705e-21	2.11571
		236	6.92074e-21	2.12935
		236.5	6.90747e-21	2.14436
		237	6.89752e-21	2.16089
		237.5	6.89119e-21	2.17906
		238	6.88881e-21	2.19903
		238.5	6.89072e-21	2.22096
		239	6.89728e-21	2.24502
		239.5	6.90889e-21	2.27142
		240	6.92595e-21	2.30037
		240.5	6.94892e-21	2.33209
		241	6.97828e-21	2.36685
		241.5	7.01453e-21	2.40492
		242	7.05822e-21	2.4466
		242.5	7.10993e-21	2.49223
		243	7.17031e-21	2.54217
		243.5	7.24002e-21	2.59682
		244	7.31979e-21	2.65663
		244.5	7.41041e-21	2.72208
		245	7.51271e-21	2.7937
		245.5	7.6276e-21	2.87208
		246	7.75606e-21	2.95785
		246.5	7.89915e-21	3.05175
		247	8.05801e-21	3.15454
		247.5	8.23387e-21	3.26712
		248	8.42808e-21	3.39043
		248.5	8.64208e-21	3.52555
		249	8.87746e-21	3.67367
		249.5	9.13593e-21	3.8361
		250	9.41935e-21	4.01432
		250.5	9.72975e-21	4.20997
		251	1.00694e-20	4.42487
		251.5	1.04406e-20	4.66107
		252	1.08462e-20	4.92087
		252.5	1.12889e-20	5.20683
		253	1.17721e-20	5.52185
		253.5	1.22992e-20	5.86919
		254	1.28741e-20	6.25253
		254.5	1.35012e-20	6.67603
		255	1.4185e-20	7.14439
		255.5	1.4931e-20	7.66298
		256	1.57448e-20	8.23789
		256.5	1.66331e-20	8.8761
		257	1.7603e-20	9.58555
		257.5	1.86627e-20	10.3754
		258	1.98211e-20	11.2561
		258.5	2.10886e-20	12.2399
		259	2.24766e-20	13.3408
		259.5	2.3998e-20	14.5751
		260	2.56675e-20	15.9619
		260.5	2.75019e-20	17.5233
		261	2.95202e-20	19.2855
		261.5	3.17441e-20	21.2792
		262	3.41987e-20	23.541
		262.5	3.69128e-20	26.1141
		263	3.99198e-20	29.0504
		263.5	4.32584e-20	32.4118
		264	4.69738e-20	36.2735
		264.5	5.11193e-20	40.7265
		265	5.57572e-20	45.882
		265.5	6.09619e-20	51.8767
		266	6.68218e-20	58.8799
		266.5	7.3443e-20	67.1026
		267	8.09537e-20	76.8099
		267.5	8.951e-20	88.3383
		268	9.93031e-20	102.118
		268.5	1.1057e-19	118.706
		269	1.23605e-19	138.828
		269.5	1.38781e-19	163.448
		270	1.56573e-19	193.856
		270.5	1.77594e-19	231.805
		271	2.02644e-19	279.723
		271.5	2.32788e-19	341.023
		272	2.69463e-19	420.611
		272.5	3.14647e-19	525.695
		273	3.71122e-19	667.144
		200	7.96811e-21	2
		200.5	7.95747e-21	2
		201	7.94659e-21	2
		201.5	7.93545e-21	2
		202	7.92404e-21	2
		202.5	7.91236e-21	2
		203	7.90039e-21	2
		203.5	7.88811e-21	2
		204	7.87551e-21	2
		204.5	7.86258e-21	2
		205	7.84931e-21	2
		205.5	7.83568e-21	2
		206	7.82168e-21	2
		206.5	7.80729e-21	2
		207	7.7925e-21	2
		207.5	7.77729e-21	2
		208	7.76165e-21	2
		208.5	7.74556e-21	2
		209	7.72901e-21	2
		209.5	7.71198e-21	2
		210	7.69446e-21	2
		210.5	7.67643e-21	2
		211	7.65787e-21	2
		211.5	7.63878e-21	2
		212	7.61916e-21	2
		212.5	7.59898e-21	2.00001
		213	7.57827e-21	2.00004
		213.5	7.55701e-21	2.00007
		214	7.53522e-21	2.00012
		214.5	7.51289e-21	2.0002
		215	7.49003e-21	2.0003
		215.5	7.46666e-21	2.00044
		216	7.44277e-21	2.00062
		216.5	7.41839e-21	2.00085
		217	7.39353e-21	2.00113
		217.5	7.3682e-21	2.00148
		218	7.34244e-21	2.00189
		218.5	7.31625e-21	2.00239
		219	7.28968e-21	2.00297
		219.5	7.26274e-21	2.00366
		220	7.23548e-21	2.00447
		220.5	7.20792e-21	2.0054
		221	7.18012e-21	2.00648
		221.5	7.15211e-21	2.00771
		222	7.12395e-21	2.00912
		222.5	7.09569e-21	2.01072
		223	7.06739e-21	2.01253
		223.5	7.03911e-21	2.01458
		224	7.01092e-21	2.01689
		224.5	6.98289e-21	2.01948
		225	6.9551e-21	2.02239
		225.5	6.92764e-21	2.02563
		226	6.9006e-21	2.02925
		226.5	6.87408e-21	2.03328
		227	6.84817e-21	2.03776
		227.5	6.823e-21	2.04272
		228	6.79868e-21	2.04821
		228.5	6.77534e-21	2.05428
		229	6.75312e-21	2.06099
		229.5	6.73215e-21	2.06838
		230	6.71259e-21	2.07652
		230.5	6.6946e-21	2.08548
		231	6.67837e-21	2.09532
		231.5	6.66406e-21	2.10613
		232	6.65188e-21	2.11797
		232.5	6.64203e-21	2.13096
		233	6.63473e-21	2.14518
		233.5	6.63023e-21	2.16075
		234	6.62876e-21	2.17776
		234.5	6.6306e-21	2.19636
		235	6.63601e-21	2.21667
		235.5	6.64531e-21	2.23885
		236	6.65881e-21	2.26304
		236.5	6.67685e-21	2.28942
		237	6.69979e-21	2.31818
		237.5	6.728e-21	2.34953
		238	6.76191e-21	2.38367
		238.5	6.80193e-21	2.42086
		239	6.84854e-21	2.46135
		239.5	6.90223e-21	2.50542
		240	6.96353e-21	2.55339
		240.5	7.03299e-21	2.60559
		241	7.11122e-21	2.66239
		241.5	7.19886e-21	2.72418
		242	7.2966e-21	2.79142
		242.5	7.40518e-21	2.86456
		243	7.52538e-21	2.94414
		243.5	7.65806e-21	3.03073
		244	7.80411e-21	3.12495
		244.5	7.96451e-21	3.2275
		245	8.14032e-21	3.33912
		245.5	8.33266e-21	3.46064
		246	8.54276e-21	3.59298
		246.5	8.7719e-21	3.73714
		247	9.02153e-21	3.89421
		247.5	9.29316e-21	4.06544
		248	9.58845e-21	4.25215
		248.5	9.90919e-21	4.45585
		249	1.02573e-20	4.67819
		249.5	1.0635e-20	4.92099
		250	1.10444e-20	5.18629
		250.5	1.14881e-20	5.47637
		251	1.19689e-20	5.79373
		251.5	1.24896e-20	6.14121
		252	1.30536e-20	6.52194
		252.5	1.36644e-20	6.93946
		253	1.43258e-20	7.39771
		253.5	1.50423e-20	7.90115
		254	1.58184e-20	8.45477
		254.5	1.66594e-20	9.06423
		255	1.7571e-20	9.73591
		255.5	1.85595e-20	10.4771
		256	1.9632e-20	11.2959
		256.5	2.07964e-20	12.2018
		257	2.20612e-20	13.2054
		257.5	2.34363e-20	14.319
		258	2.49324e-20	15.5567
		258.5	2.65619e-20	16.9345
		259	2.83382e-20	18.4712
		259.5	3.0277e-20	20.1884
		260	3.23957e-20	22.1113
		260.5	3.4714e-20	24.2691
		261	3.72546e-20	26.6961
		261.5	4.00431e-20	29.4328
		262	4.3109e-20	32.5268
		262.5	4.64861e-20	36.0344
		263	5.02137e-20	40.0228
		263.5	5.4337e-20	44.5725
		264	5.89088e-20	49.7803
		264.5	6.39909e-20	55.763
		265	6.96558e-20	62.6631
		265.5	7.59892e-20	70.6548
		266	8.30932e-20	79.953
		266.5	9.10895e-20	90.8243
		267	1.00125e-19	103.603
		267.5	1.10377e-19	118.709
		268	1.22063e-19	136.679
		268.5	1.3545e-19	158.202
		269	1.50871e-19	184.174
		269.5	1.68741e-19	215.77
		270	1.89588e-19	254.559
		270.5	2.1409e-19	302.654
		271	2.43126e-19	362.955
		271.5	2.77856e-19	439.506
		272	3.19832e-19	538.055
		272.5	3.71171e-19	666.954
		273	4.3482e-19	838.634
		200	7.24064e-21	2
		200.5	7.23113e-21	2
		201	7.2214e-21	2
		201.5	7.21144e-21	2
		202	7.20124e-21	2
		202.5	7.19078e-21	2
		203	7.18006e-21	2
		203.5	7.16906e-21	2
		204	7.15777e-21	2
		204.5	7.14619e-21	2
		205	7.13429e-21	2
		205.5	7.12206e-21	2
		206	7.1095e-21	2
		206.5	7.09659e-21	2
		207	7.08332e-21	2
		207.5	7.06969e-21	2.00001
		208	7.05569e-21	2.00003
		208.5	7.04133e-21	2.00006
		209	7.0266e-21	2.0001
		209.5	7.0115e-21	2.00016
		210	6.99603e-21	2.00024
		210.5	6.9802e-21	2.00035
		211	6.96399e-21	2.00049
		211.5	6.94743e-21	2.00068
		212	6.93051e-21	2.0009
		212.5	6.91325e-21	2.00117
		213	6.89564e-21	2.0015
		213.5	6.8777e-21	2.00189
		214	6.85945e-21	2.00235
		214.5	6.8409e-21	2.0029
		215	6.82206e-21	2.00353
		215.5	6.80296e-21	2.00426
		216	6.78362e-21	2.0051
		216.5	6.76407e-21	2.00606
		217	6.74432e-21	2.00716
		217.5	6.72442e-21	2.0084
		218	6.7044e-21	2.00981
		218.5	6.68429e-21	2.01139
		219	6.66414e-21	2.01317
		219.5	6.644e-21	2.01516
		220	6.62391e-21	2.01739
		220.5	6.60393e-21	2.01987
		221	6.58412e-21	2.02263
		221.5	6.56454e-21	2.02569
		222	6.54527e-21	2.02908
		222.5	6.52637e-21	2.03284
		223	6.50792e-21	2.03698
		223.5	6.49002e-21	2.04155
		224	6.47275e-21	2.04657
		224.5	6.45621e-21	2.0521
		225	6.44051e-21	2.05817
		225.5	6.42576e-21	2.06483
		226	6.41208e-21	2.07213
		226.5	6.39959e-21	2.08012
		227	6.38844e-21	2.08885
		227.5	6.37876e-21	2.0984
		228	6.37072e-21	2.10882
		228.5	6.36446e-21	2.12019
		229	6.36018e-21	2.13259
		229.5	6.35804e-21	2.14609
		230	6.35825e-21	2.1608
		230.5	6.36102e-21	2.1768
		231	6.36655e-21	2.1942
		231.5	6.3751e-21	2.21312
		232	6.38689e-21	2.23367
		232.5	6.4022e-21	2.25598
		233	6.42131e-21	2.28021
		233.5	6.4445e-21	2.3065
		234	6.4721e-21	2.33502
		234.5	6.50443e-21	2.36595
		235	6.54184e-21	2.39948
		235.5	6.58471e-21	2.43582
		236	6.63344e-21	2.47519
		236.5	6.68845e-21	2.51785
		237	6.75019e-21	2.56406
		237.5	6.81913e-21	2.61411
		238	6.89578e-21	2.6683
		238.5	6.98068e-21	2.72698
		239	7.0744e-21	2.79052
		239.5	7.17757e-21	2.85931
		240	7.29082e-21	2.93378
		240.5	7.41485e-21	3.01441
		241	7.55041e-21	3.10171
		241.5	7.6983e-21	3.19624
		242	7.85934e-21	3.29861
		242.5	8.03447e-21	3.40948
		243	8.22463e-21	3.52957
		243.5	8.43088e-21	3.65967
[truncated: 3,000 more rows]

## Sheet: Fig6CNT
TCNT	JCNTSW1CNTtheta10	JCNTSW1CNTtheta20	JCNTSW1CNTtheta30	JCNTSW1CNTtheta40	JCNTSW1CNTtheta50	JCNTSW1CNTtheta60	JCNTSW1CNTtheta70	JCNTSW1CNTtheta80	JCNTSW1CNTtheta90	JCNTSW09CNTtheta10	JCNTSW09CNTtheta20	JCNTSW09CNTtheta30	JCNTSW09CNTtheta40	JCNTSW09CNTtheta50	JCNTSW09CNTtheta60	JCNTSW09CNTtheta70	JCNTSW09CNTtheta80	JCNTSW09CNTtheta90
190	385219000000	1512390000000	3271580000000	5424040000000	7596930000000	9373650000000	10453200000000	10769500000000	10481100000000	485689000000	1876610000000	3803610000000	5375450000000	5595180000000	4359480000000	2611780000000	1269330000000	542012000000
190.2	447863000000	1758210000000	3802180000000	6299120000000	8810570000000	10848200000000	12063200000000	12385400000000	12008400000000	563927000000	2178320000000	4410200000000	6215700000000	6436990000000	4976070000000	2949650000000	1415220000000	595847000000
190.4	520097000000	2041630000000	4413760000000	7306900000000	10206000000000	12539600000000	13903700000000	14225300000000	13739500000000	654029000000	2525660000000	5107680000000	7178870000000	7396380000000	5672440000000	3326510000000	1575430000000	653917000000
190.6	603299000000	2368060000000	5117880000000	8466180000000	11808700000000	14477300000000	16005200000000	16317400000000	15699000000000	757680000000	2925110000000	5908770000000	8281670000000	8488450000000	6457900000000	3746230000000	1751070000000	716433000000
190.8	699027000000	2743600000000	5927660000000	9798250000000	13647300000000	16694600000000	18401700000000	18693200000000	17914000000000	876787000000	3383990000000	6827850000000	9542900000000	9730060000000	7342660000000	4213010000000	1943300000000	783605000000
191	809048000000	3175170000000	6857920000000	11327200000000	15754100000000	19228800000000	21131200000000	21387800000000	20414400000000	1013510000000	3910550000000	7881140000000	10983700000000	11140000000000	8337980000000	4731370000000	2153350000000	855638000000
191.2	935358000000	3670600000000	7925430000000	13080100000000	18165500000000	22121900000000	24236200000000	24439900000000	23233100000000	1170280000000	4514150000000	9086930000000	12627800000000	12739100000000	9456240000000	5306180000000	2382480000000	932732000000
191.4	1080220000000	4238720000000	9149120000000	15087600000000	20922500000000	25420900000000	27764200000000	27892700000000	26406500000000	1349850000000	5205310000000	10465800000000	14501800000000	14550800000000	10711000000000	5942660000000	2632010000000	1015080000000
191.6	1246170000000	4889510000000	10550400000000	17384200000000	24071100000000	29178500000000	31768000000000	31793700000000	29974300000000	1555330000000	5995910000000	12041000000000	16635400000000	16600800000000	12117100000000	6646410000000	2903290000000	1102870000000
191.8	1436090000000	5634220000000	12153200000000	20008900000000	27663100000000	33453500000000	36306400000000	36195800000000	33980400000000	1790210000000	6899330000000	13838500000000	19062100000000	18917800000000	13690900000000	7423430000000	3197750000000	1196270000000
192	1653210000000	6485540000000	13984800000000	23005200000000	31756500000000	38311900000000	41444700000000	41157100000000	38472600000000	2058420000000	7930600000000	15887500000000	21819100000000	21533600000000	15450000000000	8280130000000	3516830000000	1295450000000
192.2	1901190000000	7457700000000	16075500000000	26422300000000	36416300000000	43827000000000	47255500000000	46741800000000	43503300000000	2364370000000	9106620000000	18221000000000	24948100000000	24483300000000	17414000000000	9223330000000	3862010000000	1400540000000
192.4	2184100000000	8566750000000	18459700000000	30315100000000	41715200000000	50080800000000	53819200000000	53020400000000	49129700000000	2713050000000	10446400000000	20875500000000	28495400000000	27806000000000	19603800000000	10260300000000	4234810000000	1511680000000
192.6	2506560000000	9830700000000	21175800000000	34745400000000	47734600000000	57164500000000	61224900000000	60070600000000	55414300000000	3110000000000	11971100000000	23892400000000	32512800000000	31544400000000	22042500000000	11398700000000	4636760000000	1628980000000
192.8	2873730000000	11269700000000	24266800000000	39782200000000	54565200000000	65179500000000	69571000000000	67977800000000	62424900000000	3561480000000	13704700000000	27317500000000	37057900000000	35746000000000	24754900000000	12646800000000	5069440000000	1752530000000
193	3291390000000	12906500000000	27781200000000	45503000000000	62308600000000	74238600000000	78966300000000	76835400000000	70235600000000	4074480000000	15673800000000	31202400000000	42194600000000	40463000000000	27768200000000	14013300000000	5534410000000	1882400000000
193.2	3766040000000	14766400000000	31772900000000	51994000000000	71077600000000	84466800000000	89531000000000	86745800000000	78926400000000	4656830000000	17908200000000	35604300000000	47994200000000	45752700000000	31111700000000	15507100000000	6033250000000	2018610000000
193.4	4304910000000	16877700000000	36302300000000	59351800000000	80998100000000	96003000000000	101397000000000	97821100000000	88584400000000	5317260000000	20441400000000	40587300000000	54535400000000	51678300000000	34817000000000	17137900000000	6567540000000	2161190000000
193.6	4916130000000	19272300000000	41437000000000	67684000000000	92210200000000	109001000000000	114711000000000	110184000000000	99303600000000	6065540000000	23310400000000	46222700000000	61905800000000	58309100000000	38918300000000	18915900000000	7138840000000	2310110000000
193.8	5608750000000	21985400000000	47252400000000	77110600000000	104869000000000	123630000000000	129632000000000	123967000000000	111186000000000	6912570000000	26556900000000	52589800000000	70202200000000	65721100000000	43452600000000	20851600000000	7748700000000	2465330000000
194	6392880000000	25056700000000	53832500000000	87765000000000	119148000000000	140079000000000	146337000000000	139316000000000	124340000000000	7870500000000	30227100000000	59776800000000	79531900000000	73997500000000	48459600000000	22956100000000	8398610000000	2626760000000
194.2	7279790000000	28530200000000	61271000000000	99795800000000	135238000000000	158555000000000	165018000000000	156390000000000	138886000000000	8952860000000	34372400000000	67881700000000	90013300000000	83229300000000	53982100000000	25240900000000	9090050000000	2794280000000
194.4	8282040000000	32454900000000	69672000000000	113368000000000	153352000000000	179287000000000	185887000000000	175360000000000	154950000000000	10174700000000	39050200000000	77013400000000	101777000000000	93516300000000	60065900000000	27718000000000	9824420000000	2967750000000
194.6	9413610000000	36885500000000	79151400000000	128665000000000	173725000000000	202527000000000	209175000000000	196412000000000	172668000000000	11552800000000	44324000000000	87292600000000	114968000000000	104967000000000	66760300000000	30400100000000	10603100000000	3146950000000
194.8	10690000000000	41882800000000	89838100000000	145891000000000	196616000000000	228553000000000	235136000000000	219750000000000	192188000000000	13105700000000	50264600000000	98852800000000	129744000000000	117700000000000	74117800000000	33299900000000	11427300000000	3331670000000
195	12128600000000	47514100000000	101875000000000	165270000000000	222313000000000	257669000000000	264045000000000	245591000000000	213665000000000	14854100000000	56950400000000	111842000000000	146281000000000	131844000000000	82195000000000	36430900000000	12298200000000	3521620000000
195.2	13748400000000	53854300000000	115421000000000	187053000000000	251132000000000	290212000000000	296205000000000	274172000000000	237268000000000	16820800000000	64468200000000	126424000000000	164772000000000	147540000000000	91051800000000	39806900000000	13216800000000	3716500000000
195.4	15570800000000	60986600000000	130651000000000	211514000000000	283425000000000	326548000000000	331943000000000	305749000000000	263176000000000	19031300000000	72914300000000	142780000000000	185428000000000	164940000000000	100752000000000	43442000000000	14184200000000	3915940000000
195.6	17619400000000	69002800000000	147760000000000	238961000000000	319575000000000	367081000000000	371616000000000	340596000000000	291579000000000	21513700000000	82395200000000	161109000000000	208481000000000	184211000000000	111365000000000	47350700000000	15201100000000	4119550000000
195.8	19920100000000	78004900000000	166964000000000	269730000000000	360008000000000	412254000000000	415614000000000	379010000000000	322680000000000	24299000000000	93028700000000	181632000000000	234186000000000	205531000000000	122962000000000	51548000000000	16268100000000	4326890000000
196	22502000000000	88105600000000	188501000000000	304193000000000	405189000000000	462548000000000	464359000000000	421310000000000	356695000000000	27421500000000	104945000000000	204591000000000	262823000000000	229097000000000	135620000000000	56048800000000	17385800000000	4537470000000
196.2	25396900000000	99429500000000	212634000000000	342760000000000	455632000000000	518492000000000	518306000000000	467836000000000	393852000000000	30919400000000	118288000000000	230255000000000	294697000000000	255117000000000	149421000000000	60868500000000	18554500000000	4750790000000
196.4	28640100000000	112114000000000	239652000000000	385884000000000	511899000000000	580664000000000	577953000000000	518957000000000	434393000000000	34834300000000	133215000000000	258917000000000	330142000000000	283821000000000	164451000000000	66022500000000	19774300000000	4966270000000
196.6	32270500000000	126312000000000	269876000000000	434063000000000	574609000000000	649691000000000	643836000000000	575065000000000	478574000000000	39212700000000	149902000000000	290901000000000	369525000000000	315453000000000	180801000000000	71526500000000	21045100000000	5183330000000
196.8	36331100000000	142189000000000	303659000000000	487843000000000	644438000000000	726260000000000	716534000000000	636579000000000	526664000000000	44105200000000	168541000000000	326563000000000	413245000000000	350280000000000	198567000000000	77396200000000	22366500000000	5401340000000
197	40869200000000	159932000000000	341389000000000	547827000000000	722127000000000	811118000000000	796674000000000	703949000000000	578949000000000	49568100000000	189344000000000	366293000000000	461737000000000	388586000000000	217849000000000	83647000000000	23738200000000	5619620000000
197.2	45937000000000	179742000000000	383494000000000	614675000000000	808488000000000	905075000000000	884931000000000	777652000000000	635726000000000	55663000000000	212543000000000	410520000000000	515475000000000	430680000000000	238755000000000	90294700000000	25159200000000	5837490000000
197.4	51591700000000	201844000000000	430443000000000	689112000000000	904407000000000	1009020000000000	982033000000000	858198000000000	697308000000000	62457800000000	238394000000000	459712000000000	574976000000000	476892000000000	261394000000000	97354400000000	26628500000000	6054230000000
197.6	57896600000000	226484000000000	482753000000000	771932000000000	1010850000000000	1123900000000000	1088760000000000	946129000000000	764025000000000	70026900000000	267178000000000	514384000000000	640803000000000	527577000000000	285885000000000	104841000000000	28144900000000	6269090000000
197.8	64920800000000	253931000000000	540990000000000	864007000000000	1128880000000000	1250760000000000	1205960000000000	1042020000000000	836220000000000	78452100000000	299203000000000	575098000000000	713568000000000	583115000000000	312348000000000	112770000000000	29706800000000	6481300000000
198	72740600000000	284482000000000	605775000000000	966289000000000	1259650000000000	1390720000000000	1334530000000000	1146480000000000	914250000000000	87823300000000	334807000000000	642470000000000	793934000000000	643914000000000	340911000000000	121155000000000	31312200000000	6690080000000
198.2	81439300000000	318463000000000	677790000000000	1079820000000000	1404400000000000	1545010000000000	1475450000000000	1260160000000000	998490000000000	98238800000000	374360000000000	717170000000000	882622000000000	710412000000000	371706000000000	130010000000000	32959100000000	6894650000000
198.4	91108600000000	356229000000000	757781000000000	1205740000000000	1564520000000000	1714950000000000	1629750000000000	1383740000000000	1089330000000000	109806000000000	418267000000000	799934000000000	980413000000000	783074000000000	404871000000000	139347000000000	34645000000000	7094190000000
198.6	101849000000000	398172000000000	846564000000000	1345300000000000	1741480000000000	1901950000000000	1798540000000000	1517950000000000	1187160000000000	122644000000000	466973000000000	891561000000000	1088150000000000	862400000000000	440550000000000	149180000000000	36367100000000	7287910000000
198.8	113770000000000	444719000000000	945033000000000	1499850000000000	1936900000000000	2107550000000000	1983010000000000	1663530000000000	1292420000000000	136881000000000	520960000000000	992925000000000	1206760000000000	948920000000000	478890000000000	159520000000000	38122500000000	7475010000000
199	126992000000000	496337000000000	1054160000000000	1670870000000000	2152540000000000	2333420000000000	2184430000000000	1821310000000000	1405520000000000	152658000000000	580759000000000	1104980000000000	1337220000000000	1043200000000000	520043000000000	170376000000000	39907700000000	7654690000000
199.2	141646000000000	553539000000000	1175020000000000	1859980000000000	2390290000000000	2581340000000000	2404160000000000	1992110000000000	1526910000000000	170130000000000	646948000000000	1228750000000000	1480620000000000	1145850000000000	564169000000000	181759000000000	41719100000000	7826170000000
199.4	157876000000000	616882000000000	1308770000000000	2068930000000000	2652240000000000	2853240000000000	2643630000000000	2176830000000000	1657040000000000	189465000000000	720157000000000	1365370000000000	1638090000000000	1257500000000000	611430000000000	193676000000000	43552900000000	7988690000000
199.6	175838000000000	686976000000000	1456680000000000	2299640000000000	2940600000000000	3151180000000000	2904380000000000	2376390000000000	1796390000000000	210845000000000	801074000000000	1516060000000000	1810900000000000	1378840000000000	661991000000000	206133000000000	45404800000000	8141510000000
199.8	195704000000000	764485000000000	1620130000000000	2554180000000000	3257800000000000	3477390000000000	3188040000000000	2591760000000000	1945430000000000	234473000000000	890447000000000	1682150000000000	2000390000000000	1510580000000000	716025000000000	219136000000000	47270300000000	8283920000000
200	217661000000000	850136000000000	1800630000000000	2834820000000000	3606460000000000	3834250000000000	3496340000000000	2823960000000000	2104650000000000	260565000000000	989092000000000	1865090000000000	2208000000000000	1653500000000000	773705000000000	232689000000000	49144700000000	8415230000000
200.2	241910000000000	944718000000000	1999810000000000	3144000000000000	3989410000000000	4224330000000000	3831120000000000	3074050000000000	2274550000000000	289360000000000	1097900000000000	2066430000000000	2435290000000000	1808410000000000	835211000000000	246793000000000	51023000000000	8534810000000
200.4	268674000000000	1049090000000000	2219470000000000	3484400000000000	4409710000000000	4650370000000000	4194330000000000	3343120000000000	2455630000000000	321115000000000	1217820000000000	2287880000000000	2683940000000000	1976150000000000	900722000000000	261448000000000	52900000000000	8642060000000
200.6	298194000000000	1164190000000000	2461530000000000	3858880000000000	4870650000000000	5115310000000000	4588010000000000	3632330000000000	2648400000000000	356112000000000	1349920000000000	2531270000000000	2955750000000000	2157630000000000	970423000000000	276651000000000	54770100000000	8736430000000
200.8	330731000000000	1291030000000000	2728110000000000	4270590000000000	5375790000000000	5622300000000000	5014340000000000	3942850000000000	2853380000000000	394656000000000	1495330000000000	2798590000000000	3252650000000000	2353810000000000	1044500000000000	292400000000000	56627900000000	8817430000000
201	366570000000000	1430720000000000	3021480000000000	4722900000000000	5928950000000000	6174680000000000	5475630000000000	4275930000000000	3071070000000000	437079000000000	1655290000000000	3091990000000000	3576720000000000	2565690000000000	1123130000000000	308685000000000	58467500000000	8884620000000
201.2	406021000000000	1584460000000000	3344130000000000	5219480000000000	6534270000000000	6776040000000000	5974280000000000	4632840000000000	3302010000000000	483740000000000	1831130000000000	3413800000000000	3930170000000000	2794320000000000	1206520000000000	325500000000000	60282800000000	8937610000000
201.4	449418000000000	1753550000000000	3698750000000000	5764290000000000	7196170000000000	7430220000000000	6512850000000000	5014890000000000	3546700000000000	535031000000000	2024300000000000	3766520000000000	4315380000000000	3040810000000000	1294840000000000	342833000000000	62068000000000	8976090000000
201.6	497127000000000	1939400000000000	4088230000000000	6361590000000000	7919440000000000	8141280000000000	7094020000000000	5423430000000000	3805660000000000	591374000000000	2236390000000000	4152880000000000	4734910000000000	3306330000000000	1388290000000000	360670000000000	63816800000000	8999820000000
201.8	549541000000000	2143550000000000	4515740000000000	7016030000000000	8709180000000000	8913560000000000	7720590000000000	5859860000000000	4079390000000000	653228000000000	2469080000000000	4575790000000000	5191460000000000	3592100000000000	1487050000000000	378994000000000	65522900000000	9008610000000
202	607089000000000	2367660000000000	4984690000000000	7732570000000000	9570900000000000	9751690000000000	8395520000000000	6325610000000000	4368390000000000	721090000000000	2724230000000000	5038400000000000	5687940000000000	3899390000000000	1591300000000000	397786000000000	67180200000000	9002350000000
202.2	670234000000000	2613510000000000	5498760000000000	8516600000000000	1.05105e+16	1.06606e+16	9121900000000000	6822140000000000	4673140000000000	795496000000000	3003820000000000	5544120000000000	6227460000000000	4229540000000000	1701220000000000	417024000000000	68782400000000	8981010000000
202.4	739477000000000	2883060000000000	6061940000000000	9373910000000000	1.15343e+16	1.16454e+16	9902970000000000	7350940000000000	4994120000000000	877028000000000	3310010000000000	6096600000000000	6813330000000000	4583940000000000	1816990000000000	436683000000000	70323200000000	8944610000000
202.6	815361000000000	3178400000000000	6678530000000000	1.03107e+16	1.2649e+16	1.27117e+16	1.07421e+16	7913530000000000	5331790000000000	966315000000000	3645110000000000	6699780000000000	7449070000000000	4964040000000000	1938790000000000	456736000000000	71796700000000	8893270000000
202.8	898471000000000	3501800000000000	7353180000000000	1.13338e+16	1.3862e+16	1.38654e+16	1.16428e+16	8511470000000000	5686560000000000	1064030000000000	4011640000000000	7357880000000000	8138430000000000	5371360000000000	2066760000000000	477152000000000	73196800000000	8827180000000
203	989441000000000	3855720000000000	8090900000000000	1.24503e+16	1.51809e+16	1.51126e+16	1.26088e+16	9146310000000000	6058870000000000	1170920000000000	4412290000000000	8075450000000000	8885400000000000	5807470000000000	2201080000000000	497898000000000	74517500000000	8746570000000
203.2	1088950000000000	4242810000000000	8897100000000000	1.3668e+16	1.6614e+16	1.64599e+16	1.36439e+16	9819660000000000	6449090000000000	1287750000000000	4849990000000000	8857370000000000	9694240000000000	6274000000000000	2341890000000000	518937000000000	75753300000000	8651790000000
203.4	1197750000000000	4665910000000000	9777590000000000	1.49953e+16	1.81701e+16	1.79142e+16	1.47521e+16	1.05331e+16	6857570000000000	1415400000000000	5327870000000000	9708890000000000	1.05694e+16	6772640000000000	2489330000000000	540230000000000	76898700000000	8543210000000
203.6	1316620000000000	5128100000000000	1.07387e+16	1.64411e+16	1.98588e+16	1.94828e+16	1.59374e+16	1.12882e+16	7284630000000000	1554770000000000	5849320000000000	1.06356e+16	1.15158e+16	7305150000000000	2643530000000000	561734000000000	77948600000000	8421310000000
203.8	1446430000000000	5632710000000000	1.1787e+16	1.80149e+16	2.16899e+16	2.11736e+16	1.72043e+16	1.20867e+16	7730570000000000	1706850000000000	6417970000000000	1.16436e+16	1.25384e+16	7873320000000000	2804600000000000	583406000000000	78898000000000	8286600000000
204	1588100000000000	6183310000000000	1.293e+16	1.97272e+16	2.36743e+16	2.29945e+16	1.8557e+16	1.29301e+16	8195610000000000	1872710000000000	7037740000000000	1.27392e+16	1.36425e+16	8479040000000000	2972650000000000	605197000000000	79742400000000	8139660000000
204.2	1742620000000000	6783740000000000	1.41753e+16	2.15889e+16	2.58233e+16	2.49542e+16	2.00002e+16	1.38199e+16	8679970000000000	2053500000000000	7712830000000000	1.39294e+16	1.4834e+16	9124220000000000	3147770000000000	627058000000000	80477500000000	7981140000000
204.4	1911060000000000	7438130000000000	1.55314e+16	2.36119e+16	2.81491e+16	2.70617e+16	2.15385e+16	1.47579e+16	9183770000000000	2250440000000000	8447760000000000	1.52216e+16	1.61187e+16	9810830000000000	3330020000000000	648935000000000	81099700000000	7811720000000
204.6	2094580000000000	8150950000000000	1.70072e+16	2.58087e+16	3.06645e+16	2.93264e+16	2.31769e+16	1.57456e+16	9707140000000000	2464870000000000	9247390000000000	1.66236e+16	1.75031e+16	1.05409e+16	3519460000000000	670774000000000	81605600000000	7632140000000
204.8	2294420000000000	8926960000000000	1.86124e+16	2.81929e+16	3.33832e+16	3.17583e+16	2.49203e+16	1.67844e+16	1.02501e+16	2698200000000000	1.01169e+16	1.8144e+16	1.89939e+16	1.13166e+16	3716130000000000	692518000000000	81992100000000	7443170000000
205	2511900000000000	9771300000000000	2.03575e+16	3.07789e+16	3.63197e+16	3.43678e+16	2.67738e+16	1.7876e+16	1.08126e+16	2951960000000000	1.10619e+16	1.97917e+16	2.05981e+16	1.21399e+16	3920040000000000	714107000000000	82257000000000	7245630000000
205.2	2748450000000000	1.06895e+16	2.22533e+16	3.35822e+16	3.94896e+16	3.71657e+16	2.87426e+16	1.90217e+16	1.13947e+16	3227800000000000	1.20884e+16	2.15762e+16	2.23232e+16	1.3013e+16	4131170000000000	735481000000000	82398200000000	7040350000000
205.4	3005610000000000	1.16874e+16	2.4312e+16	3.66193e+16	4.2909e+16	4.01636e+16	3.08322e+16	2.02229e+16	1.1996e+16	3527460000000000	1.32028e+16	2.3508e+16	2.41772e+16	1.39382e+16	4349520000000000	756577000000000	82414300000000	6828210000000
205.6	3285020000000000	1.27715e+16	2.65462e+16	3.99076e+16	4.65953e+16	4.33732e+16	3.30479e+16	2.14809e+16	1.26165e+16	3852850000000000	1.4412e+16	2.55979e+16	2.61681e+16	1.49177e+16	4575000000000000	777331000000000	82304600000000	6610090000000
205.8	3588450000000000	1.39484e+16	2.89696e+16	4.34661e+16	5.05668e+16	4.68072e+16	3.53955e+16	2.27971e+16	1.32558e+16	4205960000000000	1.57233e+16	2.78575e+16	2.83049e+16	1.59538e+16	4807560000000000	797678000000000	82068600000000	6386870000000
206	3917780000000000	1.52255e+16	3.15966e+16	4.73145e+16	5.48429e+16	5.04785e+16	3.78804e+16	2.41727e+16	1.39136e+16	4588980000000000	1.71445e+16	3.02993e+16	3.05965e+16	1.70488e+16	5047070000000000	817553000000000	81706500000000	6159470000000
206.2	4275040000000000	1.66106e+16	3.44431e+16	5.14743e+16	5.94441e+16	5.44006e+16	4.05084e+16	2.56086e+16	1.45894e+16	5004210000000000	1.86842e+16	3.29364e+16	3.30526e+16	1.8205e+16	5293400000000000	836889000000000	81219200000000	5928780000000
206.4	4662400000000000	1.8112e+16	3.75255e+16	5.5968e+16	6.43918e+16	5.85876e+16	4.32854e+16	2.71058e+16	1.52827e+16	5454130000000000	2.03512e+16	3.57829e+16	3.56833e+16	1.94248e+16	5546390000000000	855620000000000	80608000000000	5695710000000
206.6	5082170000000000	1.97387e+16	4.08617e+16	6.08197e+16	6.9709e+16	6.30542e+16	4.62172e+16	2.86654e+16	1.59928e+16	5941400000000000	2.21552e+16	3.88536e+16	3.8499e+16	2.07104e+16	5805840000000000	873680000000000	79874700000000	5461120000000
206.8	5536840000000000	2.15002e+16	4.44707e+16	6.6055e+16	7.54196e+16	6.78156e+16	4.93097e+16	3.02879e+16	1.67191e+16	6468840000000000	2.41064e+16	4.21644e+16	4.15108e+16	2.20643e+16	6071520000000000	891003000000000	79022000000000	5225890000000
207	6029060000000000	2.34066e+16	4.83728e+16	7.17012e+16	8.15491e+16	7.28876e+16	5.25688e+16	3.19741e+16	1.74608e+16	7039490000000000	2.62158e+16	4.57321e+16	4.47303e+16	2.34888e+16	6343170000000000	907523000000000	78052700000000	4990850000000
207.2	6561660000000000	2.54689e+16	5.25896e+16	7.7787e+16	8.81239e+16	7.82865e+16	5.60004e+16	3.37243e+16	1.82169e+16	7656560000000000	2.8495e+16	4.95744e+16	4.81694e+16	2.49862e+16	6620500000000000	923177000000000	76970400000000	4756820000000
207.4	7137670000000000	2.76988e+16	5.71441e+16	8.43432e+16	9.51723e+16	8.40293e+16	5.96104e+16	3.5539e+16	1.89866e+16	8323520000000000	3.09565e+16	5.37104e+16	5.18408e+16	2.65588e+16	6903190000000000	937903000000000	75779000000000	4524590000000
207.6	7760320000000000	3.01086e+16	6.20608e+16	9.14022e+16	1.02724e+17	9.01334e+16	6.34046e+16	3.74183e+16	1.97687e+16	9044040000000000	3.36135e+16	5.816e+16	5.57575e+16	2.82089e+16	7190850000000000	951640000000000	74483200000000	4294880000000
207.8	8433060000000000	3.27115e+16	6.73659e+16	9.89985e+16	1.10809e+17	9.66169e+16	6.73889e+16	3.9362e+16	2.0562e+16	9822050000000000	3.64802e+16	6.29443e+16	5.99333e+16	2.99387e+16	7483110000000000	964329000000000	73087800000000	4068410000000
208	9159560000000000	3.55217e+16	7.30872e+16	1.07169e+17	1.19461e+17	1.03498e+17	7.15691e+16	4.13701e+16	2.13654e+16	1.06617e+16	3.95714e+16	6.80859e+16	6.43822e+16	3.17504e+16	7779530000000000	975916000000000	71598400000000	3845840000000
208.2	9943750000000000	3.85542e+16	7.92542e+16	1.15951e+17	1.28713e+17	1.10797e+17	7.59506e+16	4.34422e+16	2.21775e+16	1.15675e+16	4.29033e+16	7.36085e+16	6.91192e+16	3.36461e+16	8079640000000000	986347000000000	70020500000000	3627770000000
208.4	1.07898e+16	4.18251e+16	8.58985e+16	1.25387e+17	1.38602e+17	1.18532e+17	8.05391e+16	4.55775e+16	2.29969e+16	1.25442e+16	4.64928e+16	7.95371e+16	7.41594e+16	3.56277e+16	8382930000000000	995573000000000	68360500000000	3414770000000
208.6	1.17022e+16	4.53513e+16	9.30534e+16	1.3552e+17	1.49164e+17	1.26725e+17	8.53397e+16	4.77753e+16	2.38219e+16	1.35968e+16	5.03579e+16	8.58982e+16	7.95189e+16	3.76973e+16	8688880000000000	1003550000000000	66624700000000	3207340000000
208.8	1.26856e+16	4.91511e+16	1.00754e+17	1.46395e+17	1.6044e+17	1.35395e+17	9.03578e+16	5.00345e+16	2.46511e+16	1.47307e+16	5.45179e+16	9.27198e+16	8.52142e+16	3.98566e+16	8996900000000000	1010230000000000	64819900000000	3005940000000
209	1.37451e+16	5.32437e+16	1.09039e+17	1.5806e+17	1.72469e+17	1.44564e+17	9.55982e+16	5.23537e+16	2.54827e+16	1.59516e+16	5.89932e+16	1.00031e+17	9.12622e+16	4.21074e+16	9306400000000000	1015590000000000	62953100000000	2810970000000
209.2	1.48861e+16	5.76496e+16	1.17948e+17	1.70567e+17	1.85294e+17	1.54254e+17	1.01066e+17	5.47315e+16	2.63149e+16	1.72656e+16	6.38053e+16	1.07864e+17	9.76806e+16	4.44513e+16	9616720000000000	1019580000000000	61031400000000	2622780000000
209.4	1.61142e+16	6.23907e+16	1.27522e+17	1.8397e+17	1.98961e+17	1.64487e+17	1.06765e+17	5.7166e+16	2.7146e+16	1.86792e+16	6.89772e+16	1.16251e+17	1.04488e+17	4.68896e+16	9927210000000000	1022180000000000	59062200000000	2441670000000
209.6	1.74355e+16	6.74902e+16	1.37808e+17	1.98325e+17	2.13516e+17	1.75285e+17	1.12699e+17	5.96552e+16	2.79739e+16	2.01991e+16	7.45333e+16	1.25226e+17	1.11702e+17	4.94236e+16	1.02372e+16	1023360000000000	57052800000000	2267880000000
209.8	1.88565e+16	7.29726e+16	1.48853e+17	2.13691e+17	2.29006e+17	1.86671e+17	1.18873e+17	6.21967e+16	2.87967e+16	2.18328e+16	8.04994e+16	1.34826e+17	1.19344e+17	5.20546e+16	1.05458e+16	1023120000000000	55010600000000	2101580000000
210	2.0384e+16	7.8864e+16	1.60707e+17	2.30133e+17	2.45484e+17	1.98669e+17	1.25289e+17	6.4788e+16	2.96123e+16	2.35878e+16	8.69027e+16	1.45089e+17	1.27432e+17	5.47832e+16	1.08525e+16	1021430000000000	52943300000000	1942920000000
210.2	2.20252e+16	8.51921e+16	1.73423e+17	2.47716e+17	2.63001e+17	2.11301e+17	1.31951e+17	6.7426e+16	3.04187e+16	2.54725e+16	9.37723e+16	1.56056e+17	1.35987e+17	5.76103e+16	1.11563e+16	1018300000000000	50858100000000	1791980000000
210.4	2.37878e+16	9.19864e+16	1.87059e+17	2.6651e+17	2.81611e+17	2.24592e+17	1.38861e+17	7.01077e+16	3.12136e+16	2.74955e+16	1.01139e+17	1.67768e+17	1.4503e+17	6.05363e+16	1.14566e+16	1013720000000000	48762300000000	1648800000000
210.6	2.56801e+16	9.92779e+16	2.01673e+17	2.86588e+17	3.01372e+17	2.38566e+17	1.46022e+17	7.28295e+16	3.19949e+16	2.96661e+16	1.09034e+17	1.80271e+17	1.54584e+17	6.35615e+16	1.17524e+16	1007690000000000	46663300000000	1513380000000
210.8	2.77106e+16	1.071e+17	2.1733e+17	3.08028e+17	3.22343e+17	2.53247e+17	1.53434e+17	7.55878e+16	3.27604e+16	3.19939e+16	1.17494e+17	1.9361e+17	1.64669e+17	6.66858e+16	1.20429e+16	1000230000000000	44567900000000	1385650000000
211	2.98885e+16	1.15487e+17	2.34096e+17	3.30911e+17	3.44584e+17	2.6866e+17	1.61099e+17	7.83785e+16	3.35078e+16	3.44893e+16	1.26553e+17	2.07834e+17	1.75308e+17	6.99089e+16	1.23273e+16	991356000000000	42483000000000	1265540000000
211.2	3.22236e+16	1.24476e+17	2.52041e+17	3.55321e+17	3.68159e+17	2.84827e+17	1.69017e+17	8.11973e+16	3.42348e+16	3.71633e+16	1.3625e+17	2.22996e+17	1.86524e+17	7.32302e+16	1.26046e+16	981093000000000	40415100000000	1152920000000
211.4	3.47262e+16	1.34106e+17	2.71239e+17	3.81348e+17	3.93132e+17	3.01775e+17	1.77187e+17	8.40396e+16	3.49392e+16	4.00275e+16	1.46626e+17	2.39147e+17	1.98341e+17	7.66489e+16	1.28741e+16	969469000000000	38370500000000	1047630000000
211.6	3.7407e+16	1.44419e+17	2.91771e+17	4.09085e+17	4.19572e+17	3.19526e+17	1.85609e+17	8.69005e+16	3.56187e+16	4.30941e+16	1.57724e+17	2.56346e+17	2.10783e+17	8.01637e+16	1.31349e+16	956520000000000	36355100000000	949481000000
211.8	4.02777e+16	1.55459e+17	3.13717e+17	4.38631e+17	4.47549e+17	3.38105e+17	1.94282e+17	8.97748e+16	3.62711e+16	4.6376e+16	1.69588e+17	2.7465e+17	2.23873e+17	8.3773e+16	1.3386e+16	942286000000000	34374400000000	858260000000
212	4.33505e+16	1.67272e+17	3.37166e+17	4.70088e+17	4.77133e+17	3.57537e+17	2.03202e+17	9.26571e+16	3.68941e+16	4.9887e+16	1.82266e+17	2.94121e+17	2.37636e+17	8.7475e+16	1.36266e+16	926816000000000	32433700000000	773731000000
212.2	4.66381e+16	1.79906e+17	3.6221e+17	5.03563e+17	5.084e+17	3.77843e+17	2.12367e+17	9.55418e+16	3.74856e+16	5.36416e+16	1.95808e+17	3.14823e+17	2.52097e+17	9.12674e+16	1.38558e+16	910161000000000	30537800000000	695637000000
212.4	5.01543e+16	1.93413e+17	3.88946e+17	5.39169e+17	5.41426e+17	3.99047e+17	2.21772e+17	9.84229e+16	3.80434e+16	5.76549e+16	2.10267e+17	3.36824e+17	2.67281e+17	9.51475e+16	1.40728e+16	892377000000000	28690900000000	623706000000
212.6	5.39134e+16	2.07849e+17	4.17476e+17	5.77023e+17	5.76289e+17	4.21172e+17	2.31412e+17	1.01294e+17	3.85655e+16	6.19433e+16	2.25699e+17	3.60193e+17	2.83212e+17	9.91122e+16	1.42767e+16	873528000000000	26897100000000	557654000000
212.8	5.79305e+16	2.23269e+17	4.47907e+17	6.17249e+17	6.1307e+17	4.44239e+17	2.41283e+17	1.0415e+17	3.90498e+16	6.65236e+16	2.42162e+17	3.85004e+17	2.99916e+17	1.03158e+17	1.44667e+16	853678000000000	25159900000000	497185000000
213	6.22219e+16	2.39736e+17	4.80353e+17	6.59974e+17	6.51853e+17	4.6827e+17	2.51377e+17	1.06982e+17	3.94944e+16	7.14139e+16	2.59719e+17	4.11333e+17	3.17419e+17	1.07281e+17	1.4642e+16	832899000000000	23482200000000	442000000000
213.2	6.68042e+16	2.57314e+17	5.14932e+17	7.05332e+17	6.9272e+17	4.93285e+17	2.61686e+17	1.09785e+17	3.98974e+16	7.66331e+16	2.78434e+17	4.39258e+17	3.35746e+17	1.11477e+17	1.48019e+16	811265000000000	21866700000000	391795000000
213.4	7.16955e+16	2.76068e+17	5.51769e+17	7.53463e+17	7.35761e+17	5.19302e+17	2.72202e+17	1.12552e+17	4.02572e+16	8.22012e+16	2.98375e+17	4.68863e+17	3.54921e+17	1.15742e+17	1.49456e+16	788852000000000	20315600000000	346264000000
213.6	7.69145e+16	2.96072e+17	5.90997e+17	8.04513e+17	7.81063e+17	5.46342e+17	2.82916e+17	1.15275e+17	4.05722e+16	8.81392e+16	3.19615e+17	5.00234e+17	3.7497e+17	1.20069e+17	1.50725e+16	765740000000000	18830400000000	305104000000
213.8	8.2481e+16	3.17399e+17	6.32751e+17	8.58633e+17	8.28717e+17	5.74419e+17	2.93816e+17	1.17948e+17	4.08407e+16	9.44694e+16	3.42229e+17	5.3346e+17	3.95917e+17	1.24454e+17	1.51818e+16	742012000000000	17412500000000	268016000000
214	8.8416e+16	3.40128e+17	6.77179e+17	9.1598e+17	8.78815e+17	6.03551e+17	3.04892e+17	1.20562e+17	4.10616e+16	1.01215e+17	3.66296e+17	5.68633e+17	4.17788e+17	1.2889e+17	1.52731e+16	717752000000000	16062700000000	234707000000
214.2	9.47414e+16	3.64343e+17	7.24431e+17	9.76719e+17	9.31453e+17	6.33752e+17	3.1613e+17	1.23112e+17	4.12335e+16	1.08401e+17	3.919e+17	6.0585e+17	4.40605e+17	1.33371e+17	1.53457e+16	693045000000000	14781400000000	204890000000
214.4	1.0148e+17	3.90131e+17	7.74666e+17	1.04102e+18	9.86725e+17	6.65034e+17	3.27517e+17	1.25588e+17	4.13555e+16	1.16052e+17	4.19129e+17	6.45212e+17	4.64393e+17	1.37889e+17	1.53992e+16	667976000000000	13568700000000	178288000000
214.6	1.08658e+17	4.17584e+17	8.28052e+17	1.10906e+18	1.04473e+18	6.97408e+17	3.39039e+17	1.27984e+17	4.14266e+16	1.24197e+17	4.48073e+17	6.8682e+17	4.89175e+17	1.42438e+17	1.54332e+16	642633000000000	12424200000000	154636000000
214.8	1.16299e+17	4.46798e+17	8.84764e+17	1.18103e+18	1.10557e+18	7.30884e+17	3.50678e+17	1.30293e+17	4.1446e+16	1.32864e+17	4.78829e+17	7.30784e+17	5.14971e+17	1.47009e+17	1.54473e+16	617100000000000	11347300000000	133678000000
215	1.2443e+17	4.77874e+17	9.44986e+17	1.25711e+18	1.16933e+18	7.65469e+17	3.62419e+17	1.32507e+17	4.14134e+16	1.42083e+17	5.11499e+17	7.77213e+17	5.41804e+17	1.51593e+17	1.54413e+16	591464000000000	10336800000000	115173000000
215.2	1.33081e+17	5.10921e+17	1.00891e+18	1.33751e+18	1.23613e+18	8.01168e+17	3.74244e+17	1.34618e+17	4.13282e+16	1.51885e+17	5.46188e+17	8.26224e+17	5.69694e+17	1.56183e+17	1.54148e+16	565807000000000	9391550000000	98889900000
215.4	1.42281e+17	5.46048e+17	1.07673e+18	1.42242e+18	1.30606e+18	8.37984e+17	3.86133e+17	1.36621e+17	4.11904e+16	1.62304e+17	5.83007e+17	8.77933e+17	5.98659e+17	1.60769e+17	1.53678e+16	540213000000000	8509940000000	84614300000
215.6	1.52061e+17	5.83375e+17	1.14867e+18	1.51207e+18	1.37923e+18	8.75917e+17	3.98067e+17	1.38506e+17	4.1e+16	1.73374e+17	6.22071e+17	9.32465e+17	6.28719e+17	1.6534e+17	1.53002e+16	514760000000000	7690150000000	72143900000
215.8	1.62454e+17	6.23025e+17	1.22494e+18	1.60667e+18	1.45574e+18	9.14966e+17	4.10025e+17	1.40269e+17	4.07571e+16	1.85133e+17	6.63503e+17	9.89946e+17	6.59888e+17	1.69888e+17	1.5212e+16	489526000000000	6930170000000	61290500000
216	1.73496e+17	6.65126e+17	1.30577e+18	1.70645e+18	1.53568e+18	9.55124e+17	4.21984e+17	1.41901e+17	4.04621e+16	1.97619e+17	7.0743e+17	1.05051e+18	6.92182e+17	1.74401e+17	1.51034e+16	464584000000000	6227780000000	51879600000
216.2	1.85221e+17	7.09815e+17	1.39141e+18	1.81165e+18	1.61918e+18	9.96386e+17	4.33922e+17	1.43398e+17	4.01158e+16	2.10872e+17	7.53984e+17	1.11428e+18	7.25615e+17	1.7887e+17	1.49744e+16	440005000000000	5580620000000	43750600000
216.4	1.97669e+17	7.57235e+17	1.48209e+18	1.9225e+18	1.70632e+18	1.03874e+18	4.45815e+17	1.44752e+17	3.97189e+16	2.24934e+17	8.03304e+17	1.1814e+18	7.60198e+17	1.83282e+17	1.48254e+16	415854000000000	4986230000000	36755800000
216.6	2.1088e+17	8.07535e+17	1.57809e+18	2.03927e+18	1.79722e+18	1.08217e+18	4.57639e+17	1.45958e+17	3.92724e+16	2.39851e+17	8.55537e+17	1.25202e+18	7.9594e+17	1.87626e+17	1.46567e+16	392195000000000	4442010000000	30760500000
216.8	2.24894e+17	8.60871e+17	1.67968e+18	2.16221e+18	1.89197e+18	1.12666e+18	4.69368e+17	1.47011e+17	3.87775e+16	2.55667e+17	9.10833e+17	1.32628e+18	8.32848e+17	1.91892e+17	1.44687e+16	369083000000000	3945340000000	25642400000
217	2.39757e+17	9.17406e+17	1.78715e+18	2.29158e+18	1.99068e+18	1.1722e+18	4.80977e+17	1.47905e+17	3.82356e+16	2.72433e+17	9.69351e+17	1.40433e+18	8.70928e+17	1.96066e+17	1.4262e+16	346573000000000	3493530000000	21290600000
217.2	2.55515e+17	9.77313e+17	1.90078e+18	2.42766e+18	2.09344e+18	1.21874e+18	4.92438e+17	1.48637e+17	3.76483e+16	2.90199e+17	1.03126e+18	1.48633e+18	9.10182e+17	2.00137e+17	1.40371e+16	324711000000000	3083860000000	17605700000
217.4	2.72215e+17	1.04077e+18	2.02089e+18	2.57074e+18	2.20036e+18	1.26628e+18	5.03723e+17	1.49201e+17	3.70174e+16	3.09018e+17	1.09672e+18	1.57242e+18	9.50611e+17	2.04092e+17	1.37946e+16	303539000000000	2713650000000	14498400000
217.6	2.89908e+17	1.10797e+18	2.14781e+18	2.7211e+18	2.31152e+18	1.31478e+18	5.14806e+17	1.49594e+17	3.63447e+16	3.28947e+17	1.16593e+18	1.66278e+18	9.9221e+17	2.0792e+17	1.35354e+16	283096000000000	2380230000000	11889400000
217.8	3.08648e+17	1.1791e+18	2.28187e+18	2.87905e+18	2.42703e+18	1.3642e+18	5.25659e+17	1.49814e+17	3.56324e+16	3.50044e+17	1.23906e+18	1.75757e+18	1.03497e+18	2.11608e+17	1.32602e+16	263413000000000	2080950000000	9708050000
218	3.2849e+17	1.25438e+18	2.42341e+18	3.04489e+18	2.54697e+18	1.4145e+18	5.36251e+17	1.49858e+17	3.48827e+16	3.72371e+17	1.31632e+18	1.85695e+18	1.0789e+18	2.15144e+17	1.29699e+16	244515000000000	1813250000000	7892370000
218.2	3.49491e+17	1.33401e+18	2.57281e+18	3.21893e+18	2.67143e+18	1.46563e+18	5.46555e+17	1.49723e+17	3.40979e+16	3.95991e+17	1.39791e+18	1.9611e+18	1.12396e+18	2.18515e+17	1.26655e+16	226425000000000	1574650000000	6387780000
218.4	3.71713e+17	1.41822e+18	2.73043e+18	3.4015e+18	2.8005e+18	1.51756e+18	5.56541e+17	1.49409e+17	3.32806e+16	4.20971e+17	1.48403e+18	2.07019e+18	1.17015e+18	2.21709e+17	1.2348e+16	209159000000000	1362740000000	5146620000
218.6	3.95218e+17	1.50724e+18	2.89668e+18	3.59293e+18	2.93426e+18	1.57023e+18	5.66182e+17	1.48914e+17	3.24334e+16	4.47382e+17	1.57492e+18	2.18441e+18	1.21746e+18	2.24714e+17	1.20183e+16	192726000000000	1175210000000	4127510000
218.8	4.20075e+17	1.60133e+18	3.07197e+18	3.79356e+18	3.07277e+18	1.62359e+18	5.75446e+17	1.48238e+17	3.1559e+16	4.75297e+17	1.67079e+18	2.30392e+18	1.26584e+18	2.27518e+17	1.16777e+16	177133000000000	1009860000000	3294640000
219	4.46351e+17	1.70073e+18	3.25671e+18	4.00373e+18	3.21613e+18	1.67757e+18	5.84307e+17	1.47383e+17	3.06603e+16	5.04792e+17	1.7719e+18	2.42892e+18	1.31529e+18	2.3011e+17	1.13273e+16	162380000000000	864626000000	2617250000
219.2	4.74119e+17	1.80572e+18	3.45134e+18	4.22379e+18	3.36438e+18	1.7321e+18	5.92736e+17	1.46348e+17	2.974e+16	5.35947e+17	1.87849e+18	2.55959e+18	1.36576e+18	2.32479e+17	1.09682e+16	148464000000000	737535000000	2068990000
219.4	5.03455e+17	1.91656e+18	3.65634e+18	4.4541e+18	3.51758e+18	1.78713e+18	6.00704e+17	1.45136e+17	2.88012e+16	5.68846e+17	1.99081e+18	2.69613e+18	1.41722e+18	2.34613e+17	1.06017e+16	135377000000000	626751000000	1627440000
219.6	5.34439e+17	2.03356e+18	3.87216e+18	4.69504e+18	3.6758e+18	1.84256e+18	6.08184e+17	1.43749e+17	2.78468e+16	6.03575e+17	2.10914e+18	2.83871e+18	1.46963e+18	2.36503e+17	1.02289e+16	123108000000000	530559000000	1273640000
219.8	5.67152e+17	2.15701e+18	4.09931e+18	4.94696e+18	3.83908e+18	1.89834e+18	6.1515e+17	1.4219e+17	2.68798e+16	6.40225e+17	2.23375e+18	2.98753e+18	1.52295e+18	2.38139e+17	9851260000000000	111639000000000	447372000000	991596000
220	6.01682e+17	2.28724e+18	4.33829e+18	5.21026e+18	4.00745e+18	1.95437e+18	6.21576e+17	1.40463e+17	2.59032e+16	6.78891e+17	2.36493e+18	3.1428e+18	1.57713e+18	2.39512e+17	9469870000000000	100953000000000	375721000000	767944000
220.2	6.38117e+17	2.42456e+18	4.58962e+18	5.48531e+18	4.18095e+18	2.01058e+18	6.27438e+17	1.38573e+17	2.492e+16	7.19672e+17	2.50299e+18	3.30469e+18	1.6321e+18	2.40612e+17	9086030000000000	91027100000000	314262000000	591540000
220.4	6.76553e+17	2.56933e+18	4.85387e+18	5.77251e+18	4.35961e+18	2.06686e+18	6.3271e+17	1.36524e+17	2.39331e+16	7.62671e+17	2.64824e+18	3.4734e+18	1.68782e+18	2.41434e+17	8700970000000000	81836500000000	261766000000	453161000
220.6	7.17086e+17	2.72189e+18	5.13158e+18	6.07226e+18	4.54342e+18	2.12312e+18	6.37371e+17	1.34322e+17	2.29455e+16	8.07994e+17	2.80099e+18	3.64914e+18	1.74421e+18	2.41968e+17	8315940000000000	73354100000000	217117000000	345212000
220.8	7.59819e+17	2.88263e+18	5.42336e+18	6.38494e+18	4.7324e+18	2.17927e+18	6.414e+17	1.31973e+17	2.19601e+16	8.55755e+17	2.96159e+18	3.83208e+18	1.80121e+18	2.42211e+17	7932120000000000	65551000000000	179307000000	261478000
221	8.04859e+17	3.05193e+18	5.7298e+18	6.71098e+18	4.92654e+18	2.2352e+18	6.44777e+17	1.29484e+17	2.09796e+16	9.06069e+17	3.13037e+18	4.02244e+18	1.85875e+18	2.42155e+17	7550700000000000	58396400000000	147431000000	196902000
221.2	8.52316e+17	3.23018e+18	6.05152e+18	7.05077e+18	5.12582e+18	2.2908e+18	6.47484e+17	1.26861e+17	2.00066e+16	9.59058e+17	3.3077e+18	4.2204e+18	1.91674e+18	2.41798e+17	7172820000000000	51858400000000	120677000000	147394000
221.4	9.02305e+17	3.41782e+18	6.38919e+18	7.40472e+18	5.33021e+18	2.34597e+18	6.49505e+17	1.24114e+17	1.90439e+16	1.01485e+18	3.49395e+18	4.42616e+18	1.9751e+18	2.41135e+17	6799550000000000	45904100000000	98327100000	109666000
221.6	9.54947e+17	3.61527e+18	6.74345e+18	7.77326e+18	5.53968e+18	2.4006e+18	6.50826e+17	1.2125e+17	1.80939e+16	1.07357e+18	3.68951e+18	4.63989e+18	2.03373e+18	2.40165e+17	6431960000000000	40500200000000	79742500000	81090500
221.8	1.01037e+18	3.82299e+18	7.11501e+18	8.15679e+18	5.75416e+18	2.45456e+18	6.51433e+17	1.18278e+17	1.71589e+16	1.13536e+18	3.89476e+18	4.8618e+18	2.09255e+18	2.38887e+17	6071010000000000	35612900000000	64362700000	59582600
222	1.0687e+18	4.04144e+18	7.50457e+18	8.55574e+18	5.97359e+18	2.50774e+18	6.51318e+17	1.15206e+17	1.62411e+16	1.20036e+18	4.11013e+18	5.09205e+18	2.15145e+18	2.37301e+17	5717640000000000	31208600000000	51696800000	43497400
222.2	1.13007e+18	4.27112e+18	7.91286e+18	8.97051e+18	6.1979e+18	2.56002e+18	6.50471e+17	1.12044e+17	1.53427e+16	1.26873e+18	4.33603e+18	5.33084e+18	2.21032e+18	2.35407e+17	5372710000000000	27253900000000	41317600000	31545800
222.4	1.19463e+18	4.51254e+18	8.34064e+18	9.40153e+18	6.42698e+18	2.61127e+18	6.48886e+17	1.08803e+17	1.44655e+16	1.3406e+18	4.5729e+18	5.57833e+18	2.26905e+18	2.3321e+17	5036990000000000	23715900000000	32855300000	22724500
222.6	1.26252e+18	4.76622e+18	8.78869e+18	9.84921e+18	6.66072e+18	2.66138e+18	6.46561e+17	1.05491e+17	1.36112e+16	1.41615e+18	4.82119e+18	5.83468e+18	2.32754e+18	2.30711e+17	4711210000000000	20562500000000	25991200000	16257800
222.8	1.3339e+18	5.03271e+18	9.25781e+18	1.0314e+19	6.89901e+18	2.7102e+18	6.43494e+17	1.02118e+17	1.27814e+16	1.49554e+18	5.08138e+18	6.10007e+18	2.38565e+18	2.27917e+17	4396000000000000	17762600000000	20452800000	11549800
223	1.40892e+18	5.31257e+18	9.74882e+18	1.07962e+19	7.1417e+18	2.75763e+18	6.39686e+17	9.86959e+16	1.19775e+16	1.57894e+18	5.35394e+18	6.37465e+18	2.44326e+18	2.24832e+17	4091920000000000	15286100000000	16007900000	8146580
223.2	1.48774e+18	5.6064e+18	1.02626e+19	1.12963e+19	7.38863e+18	2.80352e+18	6.35142e+17	9.52337e+16	1.12008e+16	1.66653e+18	5.63936e+18	6.65855e+18	2.50025e+18	2.21466e+17	3799440000000000	13104400000000	12460200000	5704160
223.4	1.57055e+18	5.91481e+18	1.07999e+19	1.18147e+19	7.63963e+18	2.84775e+18	6.29867e+17	9.1742e+16	1.04523e+16	1.75851e+18	5.93816e+18	6.95193e+18	2.55647e+18	2.17825e+17	3518970000000000	11190000000000	9644320000	3964200
223.6	1.65752e+18	6.23842e+18	1.13618e+19	1.23518e+19	7.89451e+18	2.89019e+18	6.23871e+17	8.82309e+16	9732770000000000	1.85505e+18	6.25086e+18	7.2549e+18	2.61179e+18	2.1392e+17	3250820000000000	9517000000000	7422020000	2733990
223.8	1.74883e+18	6.5779e+18	1.19491e+19	1.2908e+19	8.15305e+18	2.93073e+18	6.17166e+17	8.47108e+16	9042990000000000	1.95636e+18	6.578e+18	7.56757e+18	2.66608e+18	2.09762e+17	2995220000000000	8061060000000	5678350000	1870870
224	1.84468e+18	6.93393e+18	1.25627e+19	1.34835e+19	8.41504e+18	2.96922e+18	6.09765e+17	8.11915e+16	8383460000000000	2.06266e+18	6.92014e+18	7.89006e+18	2.71918e+18	2.05362e+17	2752340000000000	6799370000000	4318350000	1270050
224.2	1.94526e+18	7.30721e+18	1.32037e+19	1.40789e+19	8.68023e+18	3.00554e+18	6.01685e+17	7.76829e+16	7754520000000000	2.17415e+18	7.27785e+18	8.22246e+18	2.77094e+18	2.00734e+17	2522240000000000	5710710000000	3264010000	855166
224.4	2.05078e+18	7.69848e+18	1.3873e+19	1.46945e+19	8.94836e+18	3.03959e+18	5.92945e+17	7.41945e+16	7156330000000000	2.29106e+18	7.65172e+18	8.56483e+18	2.82123e+18	1.95892e+17	2304950000000000	4775490000000	2451690000	571025
224.6	2.16146e+18	8.10847e+18	1.45716e+19	1.53305e+19	9.21913e+18	3.07122e+18	5.83568e+17	7.07357e+16	6588930000000000	2.41362e+18	8.04234e+18	8.91724e+18	2.86988e+18	1.9085e+17	2100390000000000	3975670000000	1829780000	378053
224.8	2.27752e+18	8.53799e+18	1.53006e+19	1.59874e+19	9.49226e+18	3.10034e+18	5.73576e+17	6.73152e+16	6052170000000000	2.54208e+18	8.45035e+18	9.27973e+18	2.91675e+18	1.85625e+17	1908440000000000	3294780000000	1356730000	248120
225	2.39919e+18	8.98784e+18	1.60611e+19	1.66654e+19	9.76742e+18	3.12683e+18	5.62997e+17	6.39416e+16	5545780000000000	2.67667e+18	8.87636e+18	9.65234e+18	2.96169e+18	1.80233e+17	1728890000000000	2717840000000	999266000	161397
225.2	2.52671e+18	9.45885e+18	1.6854e+19	1.73648e+19	1.00443e+19	3.15058e+18	5.51859e+17	6.0623e+16	5069360000000000	2.81767e+18	9.32104e+18	1.00351e+19	3.00453e+18	1.74691e+17	1561500000000000	2231300000000	730971000	104032
225.4	2.66033e+18	9.95189e+18	1.76806e+19	1.8086e+19	1.03225e+19	3.17149e+18	5.40193e+17	5.73669e+16	4622360000000000	2.96534e+18	9.78505e+18	1.04279e+19	3.04512e+18	1.69019e+17	1405970000000000	1822980000000	530985000	66432.8
225.6	2.80031e+18	1.04679e+19	1.8542e+19	1.8829e+19	1.06016e+19	3.18947e+18	5.2803e+17	5.41806e+16	4204150000000000	3.11995e+18	1.02691e+19	1.08308e+19	3.08332e+18	1.63233e+17	1261940000000000	1482010000000	382965000	42019.8
225.8	2.9469e+18	1.10077e+19	1.94393e+19	1.95943e+19	1.08813e+19	3.20442e+18	5.15406e+17	5.10704e+16	3813960000000000	3.2818e+18	1.07738e+19	1.12437e+19	3.11898e+18	1.57354e+17	1129020000000000	1198710000000	274195000	26319.8
226	3.1004e+18	1.15723e+19	2.03737e+19	2.03819e+19	1.11612e+19	3.21627e+18	5.02357e+17	4.80425e+16	3450970000000000	3.45118e+18	1.12999e+19	1.16665e+19	3.15193e+18	1.51399e+17	1006780000000000	964552000000	194855000	16321.9
226.2	3.26108e+18	1.21627e+19	2.13464e+19	2.11921e+19	1.14408e+19	3.22493e+18	4.88919e+17	4.51023e+16	3114240000000000	3.62839e+18	1.18482e+19	1.20992e+19	3.18205e+18	1.4539e+17	894756000000000	772027000000	137417000	10018.9
226.4	3.42924e+18	1.278e+19	2.23587e+19	2.20249e+19	1.17196e+19	3.23034e+18	4.75132e+17	4.22545e+16	2802790000000000	3.81376e+18	1.24194e+19	1.25415e+19	3.20919e+18	1.39344e+17	792469000000000	614586000000	96154100	6085.83
226.6	3.60519e+18	1.34251e+19	2.34117e+19	2.28806e+19	1.19973e+19	3.23244e+18	4.61036e+17	3.95034e+16	2515560000000000	4.00762e+18	1.30143e+19	1.29933e+19	3.23321e+18	1.33282e+17	699413000000000	486544000000	66744500	3657.37
226.8	3.78925e+18	1.40991e+19	2.45067e+19	2.37591e+19	1.22732e+19	3.23118e+18	4.46671e+17	3.68527e+16	2251470000000000	4.21029e+18	1.36335e+19	1.34545e+19	3.25398e+18	1.27223e+17	615071000000000	382997000000	45951700	2173.98
227	3.98174e+18	1.48032e+19	2.56451e+19	2.46606e+19	1.2547e+19	3.22652e+18	4.32079e+17	3.43052e+16	2009380000000000	4.42215e+18	1.4278e+19	1.39248e+19	3.27139e+18	1.21185e+17	538916000000000	299741000000	31372000	1277.81
227.2	4.183e+18	1.55386e+19	2.68281e+19	2.5585e+19	1.28181e+19	3.21843e+18	4.17302e+17	3.18633e+16	1788140000000000	4.64354e+18	1.49485e+19	1.44039e+19	3.2853e+18	1.15188e+17	470420000000000	233192000000	21234900	742.477
227.4	4.39339e+18	1.63063e+19	2.80571e+19	2.65324e+19	1.3086e+19	3.20688e+18	4.02382e+17	2.95289e+16	1586590000000000	4.87485e+18	1.56459e+19	1.48916e+19	3.29561e+18	1.09248e+17	409056000000000	180318000000	14247500	426.371
227.6	4.61327e+18	1.71078e+19	2.93334e+19	2.75026e+19	1.33501e+19	3.19186e+18	3.87362e+17	2.7303e+16	1403540000000000	5.11646e+18	1.63709e+19	1.53875e+19	3.30223e+18	1.03385e+17	354301000000000	138567000000	9473540	241.911
227.8	4.84302e+18	1.79441e+19	3.06583e+19	2.84955e+19	1.36099e+19	3.17338e+18	3.72283e+17	2.51864e+16	1237830000000000	5.36878e+18	1.71244e+19	1.58913e+19	3.30506e+18	9.76138e+16	305645000000000	105806000000	6241370	135.568
228	5.08302e+18	1.88166e+19	3.20332e+19	2.9511e+19	1.38647e+19	3.15144e+18	3.57188e+17	2.3179e+16	1088300000000000	5.63221e+18	1.79072e+19	1.64025e+19	3.30401e+18	9.19507e+16	262588000000000	80264900000	4073270	75.018
228.2	5.33367e+18	1.97267e+19	3.34596e+19	3.05488e+19	1.41142e+19	3.12606e+18	3.42118e+17	2.12804e+16	953818000000000	5.90719e+18	1.87203e+19	1.69208e+19	3.29903e+18	8.64104e+16	224649000000000	60483500000	2632700	40.9771
228.4	5.59539e+18	2.06758e+19	3.49387e+19	3.16087e+19	1.43576e+19	3.09729e+18	3.27112e+17	1.94895e+16	833268000000000	6.19415e+18	1.95645e+19	1.74455e+19	3.29005e+18	8.1007e+16	191365000000000	45266200000	1684810	22.0876
228.6	5.86861e+18	2.16652e+19	3.64721e+19	3.26904e+19	1.45943e+19	3.06516e+18	3.12211e+17	1.7805e+16	725574000000000	6.49355e+18	2.04406e+19	1.79763e+19	3.27702e+18	7.5753e+16	162295000000000	33640700000	1067300	11.7446
228.8	6.15378e+18	2.26965e+19	3.80611e+19	3.37935e+19	1.48238e+19	3.02974e+18	2.97451e+17	1.62249e+16	629694000000000	6.80587e+18	2.13496e+19	1.85126e+19	3.25993e+18	7.066e+16	137021000000000	24821800000	669113	6.15843
229	6.45134e+18	2.3771e+19	3.97071e+19	3.49176e+19	1.50455e+19	2.99108e+18	2.82871e+17	1.47469e+16	544631000000000	7.13157e+18	2.22924e+19	1.90537e+19	3.23874e+18	6.57384e+16	115149000000000	18180400000	415025	3.18336
229.2	6.76177e+18	2.48905e+19	4.14117e+19	3.60622e+19	1.52588e+19	2.94927e+18	2.68504e+17	1.33685e+16	469432000000000	7.47117e+18	2.32698e+19	1.95989e+19	3.21346e+18	6.09972e+16	96310900000000	13215900000	254621	1.62154
229.4	7.08556e+18	2.60565e+19	4.31761e+19	3.72267e+19	1.54631e+19	2.9044e+18	2.54384e+17	1.20865e+16	403193000000000	7.82518e+18	2.42828e+19	2.01476e+19	3.1841e+18	5.64442e+16	80164600000000	9532990000	154469	0.813651
229.6	7.42321e+18	2.72705e+19	4.5002e+19	3.84106e+19	1.56577e+19	2.85658e+18	2.40542e+17	1.08978e+16	345058000000000	8.19412e+18	2.53324e+19	2.06991e+19	3.15069e+18	5.20859e+16	66394200000000	6822090000	92638.2	0.402018
229.8	7.77523e+18	2.85344e+19	4.68906e+19	3.96131e+19	1.58421e+19	2.80591e+18	2.27007e+17	9798780000000000	294228000000000	8.57855e+18	2.64193e+19	2.12525e+19	3.11327e+18	4.79273e+16	54709800000000	4842550000	54905.1	0.195514
230	8.14217e+18	2.98497e+19	4.88434e+19	4.08335e+19	1.60157e+19	2.75252e+18	2.13806e+17	8785770000000000	249952000000000	8.97902e+18	2.75445e+19	2.1807e+19	3.0719e+18	4.39723e+16	44846700000000	3408850000	32149.7	0.093553
230.2	8.52458e+18	3.12184e+19	5.08619e+19	4.20711e+19	1.6178e+19	2.69654e+18	2.00965e+17	7854870000000000	211534000000000	9.39612e+18	2.87091e+19	2.23617e+19	3.02666e+18	4.02233e+16	36565500000000	2379190000	18592.8	0.0440252
230.4	8.92302e+18	3.26422e+19	5.29475e+19	4.33248e+19	1.63283e+19	2.63811e+18	1.88504e+17	7002070000000000	178329000000000	9.83045e+18	2.99137e+19	2.29157e+19	2.97764e+18	3.66815e+16	29650200000000	1646030000	10616.5	0.0203666
230.6	9.33807e+18	3.4123e+19	5.51015e+19	4.45938e+19	1.64662e+19	2.57739e+18	1.76444e+17	6223260000000000	149744000000000	1.02826e+19	3.11594e+19	2.34679e+19	2.92496e+18	3.33468e+16	23907700000000	1128590000	5983.19	0.00925791
230.8	9.77036e+18	3.56626e+19	5.73255e+19	4.5877e+19	1.6591e+19	2.51454e+18	1.64801e+17	5514280000000000	125236000000000	1.07532e+19	3.24471e+19	2.40174e+19	2.86873e+18	3.02181e+16	19166400000000	766699000	3327.02	0.00413317
231	1.02205e+19	3.72631e+19	5.96206e+19	4.71733e+19	1.67023e+19	2.44973e+18	1.53592e+17	4870960000000000	104310000000000	1.1243e+19	3.37777e+19	2.45631e+19	2.8091e+18	2.72929e+16	15274700000000	515935000	1824.7	0.00181142
231.2	1.06891e+19	3.89265e+19	6.19884e+19	4.84815e+19	1.67996e+19	2.38313e+18	1.42826e+17	4289130000000000	86518700000000	1.17526e+19	3.5152e+19	2.51039e+19	2.74624e+18	2.45677e+16	12099300000000	343826000	986.697	0.000778942
231.4	1.11769e+19	4.06548e+19	6.44301e+19	4.98004e+19	1.68823e+19	2.31492e+18	1.32515e+17	3764660000000000	71456300000000	1.22826e+19	3.65708e+19	2.56385e+19	2.68031e+18	2.20383e+16	9524510000000	226851000	525.853	0.000328487
231.6	1.16845e+19	4.24502e+19	6.69471e+19	5.11286e+19	1.69502e+19	2.24529e+18	1.22666e+17	3293500000000000	58760100000000	1.28338e+19	3.80352e+19	2.61658e+19	2.6115e+18	1.96993e+16	7449760000000	148146000	276.097	0.000135778
231.8	1.22126e+19	4.43148e+19	6.95405e+19	5.24646e+19	1.70027e+19	2.17443e+18	1.13281e+17	2871680000000000	48105900000000	1.34069e+19	3.95458e+19	2.66845e+19	2.54001e+18	1.75445e+16	5788780000000	95732500	142.758	5.4979e-05
232	1.2762e+19	4.62507e+19	7.22117e+19	5.38069e+19	1.70394e+19	2.10254e+18	1.04365e+17	2495360000000000	39205600000000	1.40027e+19	4.11035e+19	2.71933e+19	2.46607e+18	1.55672e+16	4467870000000	61196800	72.6606	2.1796e-05
232.2	1.33334e+19	4.82604e+19	7.49619e+19	5.51541e+19	1.70601e+19	2.02981e+18	9.59158e+16	2160830000000000	31804900000000	1.46219e+19	4.27091e+19	2.76909e+19	2.38991e+18	1.37599e+16	3424540000000	38687200	36.3886	8.45501e-06
232.4	1.39276e+19	5.03461e+19	7.77921e+19	5.65043e+19	1.70644e+19	1.95644e+18	8.79318e+16	1864520000000000	25679900000000	1.52654e+19	4.43632e+19	2.8176e+19	2.31175e+18	1.21146e+16	2606230000000	24179200	17.9228	3.20734e-06
232.6	1.45453e+19	5.25101e+19	8.07035e+19	5.78558e+19	1.70521e+19	1.88264e+18	8.04084e+16	1603040000000000	20635100000000	1.59339e+19	4.60667e+19	2.86471e+19	2.23185e+18	1.06231e+16	1968990000000	14935400	8.67801	1.18904e-06
232.8	1.51874e+19	5.47549e+19	8.36972e+19	5.92069e+19	1.70229e+19	1.80861e+18	7.33389e+16	1373140000000000	16500200000000	1.66282e+19	4.78202e+19	2.91027e+19	2.15047e+18	9276650000000000	1476420000000	9114770	4.12853	4.30514e-07
233	1.58546e+19	5.70829e+19	8.6774e+19	6.05555e+19	1.69766e+19	1.73453e+18	6.67149e+16	1171800000000000	13128000000000	1.73493e+19	4.96244e+19	2.95416e+19	2.06788e+18	8066420000000000	1098550000000	5493930	1.92894	1.52133e-07
233.2	1.65479e+19	5.94968e+19	8.9935e+19	6.18996e+19	1.69131e+19	1.66061e+18	6.05263e+16	996142000000000	10391700000000	1.8098e+19	5.14798e+19	2.9962e+19	1.98435e+18	6983460000000000	810925000000	3269450	0.884629	5.24332e-08
233.4	1.72682e+19	6.19989e+19	9.3181e+19	6.32373e+19	1.68323e+19	1.58704e+18	5.47616e+16	843503000000000	8182990000000	1.88751e+19	5.33869e+19	3.03627e+19	1.90014e+18	6018760000000000	593735000000	1920280	0.398011	1.76125e-08
233.6	1.80163e+19	6.45921e+19	9.65128e+19	6.45663e+19	1.67341e+19	1.514e+18	4.94076e+16	711400000000000	6409490000000	1.96817e+19	5.53464e+19	3.07421e+19	1.81555e+18	5163410000000000	431078000000	1112720	0.175581	5.76156e-09
233.8	1.87931e+19	6.7279e+19	9.99311e+19	6.58844e+19	1.66187e+19	1.44168e+18	4.44501e+16	597540000000000	4993140000000	2.05186e+19	5.73585e+19	3.10986e+19	1.73085e+18	4408630000000000	310289000000	635870	0.0759032	1.83414e-09
234	1.95997e+19	7.00622e+19	1.03436e+20	6.71894e+19	1.6486e+19	1.37026e+18	3.98739e+16	499814000000000	3868230000000	2.13869e+19	5.94236e+19	3.14307e+19	1.64631e+18	3745830000000000	221368000000	358210	0.0321355	5.67738e-10
234.2	2.0437e+19	7.29446e+19	1.07029e+20	6.84787e+19	1.63361e+19	1.2999e+18	3.56628e+16	416295000000000	2979800000000	2.22875e+19	6.15421e+19	3.17371e+19	1.56221e+18	3166730000000000	156491000000	198843	0.0133163	1.70736e-10
234.4	2.1306e+19	7.5929e+19	1.1071e+20	6.97501e+19	1.61692e+19	1.23077e+18	3.17999e+16	345228000000000	2282160000000	2.32215e+19	6.37142e+19	3.20161e+19	1.47881e+18	2663360000000000	109590000000	108717	0.00539734	4.98416e-11
234.6	2.22077e+19	7.90183e+19	1.14479e+20	7.1001e+19	1.59857e+19	1.163e+18	2.82679e+16	285024000000000	1737540000000	2.41898e+19	6.59399e+19	3.22662e+19	1.39639e+18	2228120000000000	76005300000	58520	0.00213838	1.41111e-11
234.8	2.31433e+19	8.22155e+19	1.18337e+20	7.22289e+19	1.57856e+19	1.09676e+18	2.5049e+16	234255000000000	1314920000000	2.51936e+19	6.82194e+19	3.24861e+19	1.31519e+18	1853840000000000	52189000000	30997.3	0.000827563	3.87102e-12
235	2.41138e+19	8.55235e+19	1.22283e+20	7.34311e+19	1.55695e+19	1.03216e+18	2.21252e+16	191638000000000	988960000000	2.6234e+19	7.05525e+19	3.26743e+19	1.23546e+18	1533760000000000	35468900000	16149	0.000312621	1.02795e-12
235.2	2.51203e+19	8.89454e+19	1.26318e+20	7.46049e+19	1.53376e+19	9.69329e+17	1.94785e+16	156035000000000	739123000000	2.7312e+19	7.29391e+19	3.28295e+19	1.15743e+18	1261600000000000	23851400000	8270.89	0.00011519	2.63978e-13
235.4	2.6164e+19	9.24842e+19	1.30441e+20	7.57478e+19	1.50905e+19	9.08376e+17	1.70908e+16	126433000000000	548848000000	2.84289e+19	7.5379e+19	3.29503e+19	1.08132e+18	1031560000000000	15864900000	4162.11	4.13674e-05	6.54878e-14
235.6	2.7246e+19	9.61431e+19	1.34652e+20	7.68569e+19	1.48286e+19	8.49396e+17	1.49444e+16	101942000000000	404877000000	2.95857e+19	7.78717e+19	3.30355e+19	1.00732e+18	838285000000000	10434600000	2056.81	1.44678e-05	1.56778e-14
235.8	2.83677e+19	9.99252e+19	1.38951e+20	7.79295e+19	1.45525e+19	7.92476e+17	1.30218e+16	81780700000000	296664000000	3.07837e+19	8.04167e+19	3.30838e+19	9.35623e+17	676917000000000	6783790000	997.583	4.92362e-06	3.61789e-15
236	2.95301e+19	1.03834e+20	1.43336e+20	7.89627e+19	1.42628e+19	7.37689e+17	1.1306e+16	65269100000000	215880000000	3.20241e+19	8.30134e+19	3.30942e+19	8.664e+17	543050000000000	4357870000	474.594	1.62905e-06	8.03838e-16
236.2	3.07347e+19	1.07872e+20	1.47807e+20	7.99539e+19	1.39603e+19	6.85094e+17	9780370000000000	51816900000000	155991000000	3.33082e+19	8.5661e+19	3.30657e+19	7.99796e+17	432730000000000	2765140000	221.334	5.23554e-07	1.71752e-16
236.4	3.19827e+19	1.12044e+20	1.52363e+20	8.09001e+19	1.36455e+19	6.3474e+17	8429010000000000	40915900000000	111906000000	3.46372e+19	8.83586e+19	3.29973e+19	7.35941e+17	342434000000000	1732330000	101.123	1.63291e-07	3.52458e-17
236.6	3.32754e+19	1.16352e+20	1.57003e+20	8.17985e+19	1.33193e+19	5.86663e+17	7236630000000000	32130500000000	79690500000	3.60125e+19	9.11051e+19	3.28881e+19	6.74944e+17	269044000000000	1071120000	45.232	4.93761e-08	6.93781e-18
236.8	3.46143e+19	1.20799e+20	1.61726e+20	8.26464e+19	1.29826e+19	5.40885e+17	6188680000000000	25089400000000	56322600000	3.74353e+19	9.38991e+19	3.27376e+19	6.16891e+17	209824000000000	653365000	19.794	1.44607e-08	1.30815e-18
237	3.60007e+19	1.2539e+20	1.66529e+20	8.3441e+19	1.2636e+19	4.97419e+17	5271370000000000	19478500000000	39500900000	3.8907e+19	9.67393e+19	3.2545e+19	5.61849e+17	162396000000000	393001000	8.4684	4.09754e-09	2.35938e-19
237.2	3.74361e+19	1.30128e+20	1.71412e+20	8.41794e+19	1.22806e+19	4.56265e+17	4471710000000000	15033400000000	27485400000	4.0429e+19	9.9624e+19	3.23101e+19	5.09863e+17	124701000000000	232998000	3.5394	1.12214e-09	4.06452e-20
237.4	3.89219e+19	1.35016e+20	1.76371e+20	8.4859e+19	1.19172e+19	4.1741e+17	3777530000000000	11532800000000	18970900000	4.20028e+19	1.02551e+20	3.20324e+19	4.60957e+17	94980300000000	136089000	1.44404	2.96666e-10	6.67769e-21
237.6	4.04597e+19	1.40057e+20	1.81406e+20	8.54771e+19	1.15469e+19	3.80835e+17	3177490000000000	8792850000000	12986100000	4.36297e+19	1.05519e+20	3.17119e+19	4.15133e+17	71737400000000	78269800	0.57465	7.56264e-11	1.04462e-21
237.8	4.20511e+19	1.45256e+20	1.86513e+20	8.60311e+19	1.11705e+19	3.46505e+17	2661090000000000	6661550000000	8814480000	4.53112e+19	1.08526e+20	3.13486e+19	3.72376e+17	53714000000000	44303400	0.222861	1.85664e-11	1.5534e-22
238	4.36976e+19	1.50615e+20	1.91689e+20	8.65185e+19	1.07891e+19	3.14382e+17	2218670000000000	5014280000000	5931280000	4.70489e+19	1.11568e+20	3.09427e+19	3.32649e+17	39859500000000	24667100	0.0841576	4.38405e-12	2.19206e-23
238.2	4.54008e+19	1.56139e+20	1.96932e+20	8.69368e+19	1.04037e+19	2.84414e+17	1841340000000000	3749400000000	3955910000	4.88442e+19	1.14643e+20	3.04945e+19	2.95899e+17	29305400000000	13501900	0.030916	9.94342e-13	2.93011e-24
238.4	4.71624e+19	1.61831e+20	2.02238e+20	8.72837e+19	1.00153e+19	2.56543e+17	1521040000000000	2784640000000	2614550000	5.06986e+19	1.17749e+20	3.00047e+19	2.62053e+17	21340100000000	7261260	0.011038	2.16323e-13	3.70305e-25
238.6	4.89842e+19	1.67695e+20	2.07605e+20	8.75568e+19	9.62497e+18	2.30705e+17	1250430000000000	2053790000000	1712010000	5.26138e+19	1.20881e+20	2.94741e+19	2.31027e+17	15386400000000	3834450	0.00382634	4.5076e-14	4.41601e-26
238.8	5.08678e+19	1.73734e+20	2.13027e+20	8.77542e+19	9.23375e+18	2.0683e+17	1022930000000000	1504020000000	1110390000	5.45913e+19	1.24037e+20	2.89035e+19	2.02719e+17	10980400000000	1986970	0.00128651	8.98264e-15	4.95915e-27
239	5.28151e+19	1.79952e+20	2.18502e+20	8.78738e+19	8.84265e+18	1.84839e+17	832624000000000	1093410000000	713182000	5.66328e+19	1.27213e+20	2.82942e+19	1.77017e+17	7753310000000	1009690	0.000419093	1.70919e-15	5.23315e-28
239.2	5.48279e+19	1.86352e+20	2.24024e+20	8.79137e+19	8.45271e+18	1.64652e+17	674236000000000	788987000000	453503000	5.87399e+19	1.30404e+20	2.76475e+19	1.53799e+17	5414740000000	502791	0.000132124	3.1002e-16	5.17762e-29
239.4	5.69081e+19	1.92939e+20	2.2959e+20	8.78724e+19	8.06492e+18	1.46184e+17	543104000000000	564980000000	285434000	6.09142e+19	1.33606e+20	2.69651e+19	1.32933e+17	3738700000000	245176	4.02641e-05	5.35114e-17	4.79179e-30
239.6	5.90575e+19	1.99715e+20	2.35193e+20	8.77482e+19	7.68028e+18	1.29348e+17	435116000000000	401412000000	177773000	6.31575e+19	1.36814e+20	2.62486e+19	1.14281e+17	2551160000000	116985	1.18463e-05	8.77363e-18	4.13816e-31
239.8	6.12781e+19	2.06685e+20	2.40829e+20	8.75399e+19	7.29974e+18	1.14054e+17	346674000000000	282916000000	109534000	6.54715e+19	1.40024e+20	2.55002e+19	9.7699e+16	1719670000000	54575.2	3.36058e-06	1.36385e-18	3.32626e-32
240	6.35719e+19	2.13852e+20	2.46492e+20	8.72464e+19	6.92424e+18	1.00211e+17	274645000000000	197763000000	66747100	6.78579e+19	1.4323e+20	2.4722e+19	8.30421e+16	1144580000000	24872.2	9.17968e-07	2.00611e-19	2.48191e-33
240.2	6.59411e+19	2.21219e+20	2.52176e+20	8.68667e+19	6.55466e+18	8.77272e+16	216318000000000	137077000000	40215900	7.03184e+19	1.46426e+20	2.39163e+19	7.01626e+16	751860000000	11063.9	2.41108e-07	2.78639e-20	1.71431e-34
240.4	6.83875e+19	2.28791e+20	2.57875e+20	8.64003e+19	6.19187e+18	7.65122e+16	169366000000000	94194400000	23950700	7.28548e+19	1.49606e+20	2.30858e+19	5.89139e+16	487199000000	4799.4	6.08026e-08	3.64662e-21	1.09295e-35
240.6	7.09135e+19	2.3657e+20	2.63582e+20	8.58465e+19	5.83667e+18	6.64759e+16	131795000000000	64154400000	14095000	7.5469e+19	1.52764e+20	2.22331e+19	4.91511e+16	311265000000	2028.3	1.46991e-08	4.48661e-22	6.41204e-37
240.8	7.35211e+19	2.4456e+20	2.69291e+20	8.52053e+19	5.48981e+18	5.75298e+16	101918000000000	43298400000	8194130	7.81626e+19	1.55893e+20	2.13613e+19	4.07332e+16	195964000000	834.276	3.40104e-09	5.1772e-23	3.45053e-38
241	7.62126e+19	2.52765e+20	2.74993e+20	8.44766e+19	5.15201e+18	4.95877e+16	78308400000000	28950600000	4704300	8.09376e+19	1.58985e+20	2.04733e+19	3.35238e+16	121506000000	333.632	7.5188e-10	5.58908e-24	1.69752e-39
241.2	7.89902e+19	2.61187e+20	2.80682e+20	8.36609e+19	4.8239e+18	4.2566e+16	59772300000000	19172500000	2666240	8.37958e+19	1.62034e+20	1.95723e+19	2.73926e+16	74154300000	129.577	1.58536e-10	5.6302e-25	7.60784e-41
241.4	8.18563e+19	2.69831e+20	2.86348e+20	8.27587e+19	4.50607e+18	3.63843e+16	45316000000000	12572700000	1491310	8.67389e+19	1.65031e+20	1.86617e+19	2.2216e+16	44517100000	48.8197	3.1823e-11	5.27786e-26	3.09473e-42
241.6	8.48133e+19	2.78698e+20	2.91984e+20	8.17709e+19	4.19905e+18	3.09657e+16	34118100000000	8161860000	822899	8.97689e+19	1.67968e+20	1.77448e+19	1.78783e+16	26271500000	17.8213	6.06925e-12	4.5909e-27	1.13821e-43
241.8	8.78635e+19	2.87793e+20	2.97582e+20	8.06986e+19	3.90329e+18	2.6237e+16	25504900000000	5243820000	447798	9.28876e+19	1.70836e+20	1.68251e+19	1.42719e+16	15230400000	6.29527	1.09753e-12	3.69432e-28	3.76962e-45
242	9.10095e+19	2.97118e+20	3.03131e+20	7.95433e+19	3.61918e+18	2.21291e+16	18927000000000	3333370000	240221	9.60968e+19	1.73627e+20	1.59061e+19	1.12977e+16	8667600000	2.14902	1.87781e-13	2.74155e-29	1.11943e-46
242.2	9.42537e+19	3.06675e+20	3.08623e+20	7.83068e+19	3.34704e+18	1.8577e+16	13940500000000	2095900000	126988	9.93985e+19	1.7633e+20	1.49913e+19	8865590000000000	4838570000	0.707962	3.03284e-14	1.86999e-30	2.96742e-48
242.4	9.75987e+19	3.16469e+20	3.14047e+20	7.69912e+19	3.08713e+18	1.55202e+16	10188800000000	1303110000	66125.5	1.02794e+20	1.78936e+20	1.40841e+19	6894100000000000	2647410000	0.224742	4.61293e-15	1.16828e-31	6.9887e-50
242.6	1.01047e+20	3.26501e+20	3.19394e+20	7.55987e+19	2.83963e+18	1.29025e+16	7387940000000	800913000	33903.7	1.06286e+20	1.81435e+20	1.31882e+19	5310540000000000	1418570000	0.0686425	6.59086e-16	6.66076e-33	1.45512e-51
242.8	1.04602e+20	3.36773e+20	3.24654e+20	7.41321e+19	2.60466e+18	1.06721e+16	5313610000000	486454000	17108.5	1.09876e+20	1.83816e+20	1.23067e+19	4050600000000000	743745000	0.0201386	8.82267e-17	3.45215e-34	2.66457e-53
243	1.08265e+20	3.47289e+20	3.29814e+20	7.25943e+19	2.38227e+18	8781280000000000	3789870000000	291883000	8493.23	1.13566e+20	1.86069e+20	1.14431e+19	3058020000000000	381188000	0.00566561	1.10342e-17	1.61986e-35	4.26772e-55
243.2	1.1204e+20	3.58049e+20	3.34865e+20	7.09885e+19	2.17244e+18	7186920000000000	2679940000000	172958000	4146.02	1.17357e+20	1.88182e+20	1.06005e+19	2284080000000000	190798000	0.00152568	1.28557e-18	6.8521e-37	5.94424e-57
243.4	1.15929e+20	3.69057e+20	3.39796e+20	6.93184e+19	1.97508e+18	5849780000000000	1878410000000	101178000	1989.21	1.21252e+20	1.90143e+20	9.78177e+18	1687070000000000	93171100	0.000392512	1.39099e-19	2.60116e-38	7.15621e-59
243.6	1.19936e+20	3.80313e+20	3.44593e+20	6.75877e+19	1.79008e+18	4734570000000000	1304700000000	58409500	937.587	1.25251e+20	1.91943e+20	8.98981e+18	1231660000000000	44339700	9.62814e-05	1.39318e-20	8.81937e-40	7.39891e-61
243.8	1.24063e+20	3.91819e+20	3.49246e+20	6.58004e+19	1.61721e+18	3809770000000000	897788000000	33263900	433.912	1.29358e+20	1.93567e+20	8.22713e+18	888322000000000	20540500	2.24706e-05	1.28723e-21	2.65736e-41	6.5254e-63
244	1.28313e+20	4.03577e+20	3.53742e+20	6.3961e+19	1.45625e+18	3047350000000000	611881000000	18680400	197.071	1.33572e+20	1.95006e+20	7.49603e+18	632602000000000	9251560	4.97848e-06	1.09319e-22	7.07782e-43	4.87409e-65
244.2	1.32689e+20	4.15587e+20	3.5807e+20	6.20741e+19	1.30688e+18	2422580000000000	412924000000	10340600	87.7893	1.37897e+20	1.96245e+20	6.79853e+18	444554000000000	4046220	1.04463e-06	8.50087e-24	1.65711e-44	3.06018e-67
244.4	1.37195e+20	4.2785e+20	3.62216e+20	6.01444e+19	1.16877e+18	1913770000000000	275841000000	5639920	38.3364	1.42333e+20	1.97274e+20	6.13637e+18	308099000000000	1716050	2.07078e-07	6.02836e-25	3.39022e-46	1.60212e-69
244.6	1.41833e+20	4.40366e+20	3.66167e+20	5.81769e+19	1.04153e+18	1502040000000000	182350000000	3029550	16.4014	1.46883e+20	1.9808e+20	5.51095e+18	210451000000000	704756	3.86776e-08	3.8819e-26	6.02296e-48	6.93543e-72
244.8	1.46607e+20	4.53136e+20	3.69912e+20	5.61769e+19	9.24743e+17	1171020000000000	119256000000	1602020	6.87048	1.51547e+20	1.9865e+20	4.92334e+18	141583000000000	279848	6.78776e-09	2.25959e-27	9.23029e-50	2.46035e-74
245	1.5152e+20	4.66158e+20	3.73437e+20	5.41496e+19	8.17955e+17	906695000000000	77132700000	833565	2.81616	1.56326e+20	1.98974e+20	4.37429e+18	93748400000000	107272	1.11597e-09	1.18324e-28	1.2117e-51	7.08526e-77
245.2	1.56575e+20	4.79434e+20	3.76729e+20	5.21007e+19	7.20693e+17	697077000000000	49322300000	426564	1.12878	1.61222e+20	1.99038e+20	3.86417e+18	61048600000000	39627.4	1.71347e-10	5.54581e-30	1.35242e-53	1.63981e-79
245.4	1.61776e+20	4.9296e+20	3.79775e+20	5.00358e+19	6.32463e+17	532024000000000	31170500000	214578	0.442134	1.66237e+20	1.98833e+20	3.39303e+18	39066000000000	14082.3	2.44879e-11	2.31401e-31	1.27333e-55	3.01781e-82
245.6	1.67125e+20	5.06737e+20	3.82562e+20	4.79604e+19	5.52755e+17	403013000000000	19462000000	106052	0.169116	1.71371e+20	1.98347e+20	2.96058e+18	24545000000000	4805.03	3.24603e-12	8.54648e-33	1.00287e-57	4.36667e-85
245.8	1.72628e+20	5.20761e+20	3.85077e+20	4.58804e+19	4.8105e+17	302933000000000	12000900000	51469.3	0.0631228	1.76624e+20	1.97568e+20	2.5662e+18	15127700000000	1571.03	3.97603e-13	2.77713e-34	6.54888e-60	4.90871e-88
246	1.78286e+20	5.35031e+20	3.87307e+20	4.38015e+19	4.16824e+17	225897000000000	7305660000	24515	0.0229738	1.81998e+20	1.96489e+20	2.20895e+18	9137210000000	491.138	4.48247e-14	7.88838e-36	3.51237e-62	4.23266e-91
246.2	1.84104e+20	5.49544e+20	3.8924e+20	4.17295e+19	3.59554e+17	167073000000000	4388840000	11453	0.00814677	1.87493e+20	1.95099e+20	1.88761e+18	5403040000000	146.476	4.63147e-15	1.94529e-37	1.53173e-64	2.76193e-94
246.4	1.90085e+20	5.64297e+20	3.90863e+20	3.96701e+19	3.08719e+17	122524000000000	2600810000	5245.06	0.00281249	1.93109e+20	1.93391e+20	1.6007e+18	3124450000000	41.5738	4.36616e-16	4.13442e-39	5.37372e-67	1.34434e-97
246.6	1.96234e+20	5.79285e+20	3.92165e+20	3.7629e+19	2.6381e+17	89073200000000	1519670000	2353.15	0.00094446	1.98847e+20	1.91357e+20	1.3465e+18	1764890000000	11.2005	3.73748e-17	7.51454e-41	1.49946e-69	4.80669e-101
246.8	2.02553e+20	5.94505e+20	3.93132e+20	3.56116e+19	2.24328e+17	64174000000000	875140000	1033.56	0.000308235	2.04706e+20	1.88992e+20	1.12311e+18	972590000000	2.85645	2.89028e-18	1.15838e-42	3.28772e-72	1.24201e-104
247	2.09046e+20	6.0995e+20	3.93754e+20	3.36233e+19	1.89789e+17	45807600000000	496473000	444.139	9.76771e-05	2.10686e+20	1.86291e+20	9.28455e+17	522205000000	0.687558	2.00825e-19	1.50114e-44	5.59163e-75	2.27918e-108
247.2	2.15718e+20	6.25615e+20	3.9402e+20	3.16694e+19	1.59731e+17	32385600000000	277328000	186.591	3.00264e-05	2.16787e+20	1.83253e+20	7.60352e+17	272797000000	0.155713	1.24648e-20	1.62002e-46	7.27561e-78	2.91559e-112
247.4	2.22573e+20	6.41494e+20	3.9392e+20	2.97547e+19	1.33709e+17	22670900000000	152460000	76.5832	8.94509e-06	2.23007e+20	1.79874e+20	6.16542e+17	138443000000	0.0330686	6.8683e-22	1.44135e-48	7.13646e-81	2.54881e-116
247.6	2.29613e+20	6.5758e+20	3.93443e+20	2.78841e+19	1.11306e+17	15709100000000	82443800	30.6845	2.57985e-06	2.29344e+20	1.76157e+20	4.94729e+17	68145400000	0.00656188	3.33752e-23	1.04591e-50	5.19433e-84	1.49068e-120
247.8	2.36844e+20	6.73865e+20	3.9258e+20	2.60619e+19	9.21247e+16	10771000000000	43829100	11.9923	7.19563e-07	2.35798e+20	1.72105e+20	3.92623e+17	32478100000	0.00121199	1.42012e-24	6.11904e-53	2.75855e-87	5.70153e-125
248	2.44269e+20	6.90339e+20	3.91324e+20	2.42923e+19	7.5798e+16	7305130000000	22894300	4.56801	1.93877e-07	2.42366e+20	1.67721e+20	3.07974e+17	14960000000	0.00020751	5.25102e-26	2.85087e-55	1.04975e-90	1.39181e-129
248.2	2.51893e+20	7.06995e+20	3.89666e+20	2.25791e+19	6.19838e+16	4899080000000	11743500	1.69442	5.04038e-08	2.49046e+20	1.63015e+20	2.38613e+17	6646660000	3.27901e-05	1.67355e-27	1.04382e-57	2.80755e-94	2.11254e-134
248.4	2.59719e+20	7.2382e+20	3.876e+20	2.09258e+19	5.03674e+16	3247510000000	5911680	0.611498	1.26287e-08	2.55834e+20	1.57996e+20	1.82474e+17	2842380000	4.75943e-06	4.55728e-29	2.96113e-60	5.16859e-98	1.93865e-139
248.6	2.67753e+20	7.40804e+20	3.85121e+20	1.93353e+19	4.06612e+16	2127000000000	2918690	0.214509	3.04558e-09	2.62727e+20	1.52677e+20	1.37625e+17	1167290000	6.31352e-07	1.05041e-30	6.4098e-63	6.40496e-102	1.04373e-144
248.8	2.75997e+20	7.57935e+20	3.82223e+20	1.78104e+19	3.26042e+16	1375900000000	1412350	0.0730724	7.06035e-10	2.6972e+20	1.47074e+20	1.02288e+17	459230000	7.6124e-08	2.02864e-32	1.0415e-65	5.21586e-106	3.19157e-150
249	2.84457e+20	7.75199e+20	3.78904e+20	1.63532e+19	2.59616e+16	878668000000	669381	0.0241478	1.57122e-10	2.76809e+20	1.41205e+20	7.48505e+16	172620000	8.29382e-09	3.24724e-34	1.24803e-68	2.71999e-110	5.35327e-156
249.2	2.93136e+20	7.92582e+20	3.75162e+20	1.49656e+19	2.05235e+16	553718000000	310506	0.00773321	3.35186e-11	2.83988e+20	1.35093e+20	5.38747e+16	61819400	8.11371e-10	4.25784e-36	1.08212e-71	8.83356e-115	4.74373e-162
249.4	3.0204e+20	8.10069e+20	3.70995e+20	1.3649e+19	1.61035e+16	344173000000	140866	0.00239731	6.84428e-12	2.9125e+20	1.28763e+20	3.81017e+16	21028200	7.07865e-11	4.51577e-38	6.65107e-75	1.7337e-119	2.1326e-168
249.6	3.11172e+20	8.27643e+20	3.66405e+20	1.24042e+19	1.25381e+16	210902000000	62450.9	0.000718572	1.33565e-12	2.98588e+20	1.22241e+20	2.64475e+16	6771480	5.46692e-12	3.82123e-40	2.83424e-78	1.99056e-124	4.65571e-175
249.8	3.20537e+20	8.45286e+20	3.61393e+20	1.12317e+19	9684150000000000	127344000000	27034.3	0.000208007	2.487e-13	3.05994e+20	1.1556e+20	1.7996e+16	2056910	3.70793e-13	2.54203e-42	8.17509e-82	1.2909e-129	4.70758e-182
250	3.30139e+20	8.6298e+20	3.55964e+20	1.01316e+19	7418050000000000	75726300000	11417.3	5.80772e-05	4.41112e-14	3.13458e+20	1.08753e+20	1.19881e+16	587097	2.18961e-14	1.30832e-44	1.55518e-85	4.55209e-135	2.09457e-189
250.2	3.39983e+20	8.80705e+20	3.50122e+20	9.10344e+18	5633620000000000	44324300000	4699.96	1.56201e-05	7.43949e-15	3.2097e+20	1.01857e+20	7806980000000000	156800	1.11527e-15	5.11995e-47	1.89703e-89	8.37593e-141	3.87939e-197
250.4	3.50074e+20	8.98439e+20	3.43875e+20	8.14649e+18	4240520000000000	25522000000	1884.1	4.04127e-06	1.19086e-15	3.28518e+20	9.49101e+19	4962540000000000	39006.6	4.85023e-17	1.49505e-49	1.43914e-93	7.69008e-147	2.81593e-205
250.6	3.60416e+20	9.16159e+20	3.37231e+20	7.25955e+18	3162600000000000	14447900000	734.796	1.00436e-06	1.80577e-16	3.36089e+20	8.79548e+19	3073840000000000	8993.65	1.7812e-18	3.19148e-52	6.56809e-98	3.35575e-153	7.50278e-214
250.8	3.71014e+20	9.33842e+20	3.30202e+20	6.44103e+18	2336230000000000	8036020000	278.51	2.39412e-07	2.58868e-17	3.43668e+20	8.10336e+19	1851900000000000	1911.59	5.4577e-20	4.87078e-55	1.73935e-102	6.60129e-160	6.83277e-223
251	3.81872e+20	9.5146e+20	3.22798e+20	5.68906e+18	1708750000000000	4388690000	102.486	5.46528e-08	3.50097e-18	3.51239e+20	7.41905e+19	1083040000000000	372.357	1.3771e-21	5.18715e-58	2.56943e-107	5.52587e-167	1.96787e-232
251.2	3.92994e+20	9.68988e+20	3.15035e+20	5.0014e+18	1237010000000000	2351730000	36.5717	1.19282e-08	4.45693e-19	3.58783e+20	6.74704e+19	613503000000000	66.0453	2.82076e-23	3.75379e-61	2.0282e-112	1.84826e-174	1.64656e-242
251.4	4.04386e+20	9.86397e+20	3.06929e+20	4.37555e+18	885990000000000	1235620000	12.641	2.48479e-09	5.32866e-20	3.6628e+20	6.09178e+19	335813000000000	10.5924	4.61767e-25	1.79323e-64	8.16188e-118	2.30583e-182	3.64813e-253
251.6	4.16052e+20	1.00366e+21	2.98498e+20	3.80878e+18	627580000000000	636063000	4.22704	4.93147e-10	5.96876e-21	3.73708e+20	5.45766e+19	177155000000000	1.52432	5.93883e-27	5.47834e-68	1.59044e-123	9.951e-191	1.93362e-264
251.8	4.27997e+20	1.02073e+21	2.89761e+20	3.29812e+18	439450000000000	320545000	1.36569	9.30718e-11	6.24786e-22	3.81041e+20	4.84888e+19	89813300000000	0.195177	5.88902e-29	1.03369e-71	1.41832e-129	1.36768e-199	2.19339e-276
252	4.40225e+20	1.0376e+21	2.80741e+20	2.84045e+18	304057000000000	158012000	0.425742	1.66708e-11	6.09544e-23	3.88253e+20	4.26938e+19	43620600000000	0.0220307	4.41054e-31	1.15947e-75	5.44025e-136	5.46694e-209	4.71158e-289
252.2	4.5274e+20	1.05421e+21	2.7146e+20	2.43253e+18	207778000000000	76124600	0.12788	2.8281e-12	5.52706e-24	3.95313e+20	3.72276e+19	20225700000000	0.00216994	2.43885e-33	7.41265e-80	8.38308e-143	5.75102e-219	0
252.4	4.65549e+20	1.07053e+21	2.61945e+20	2.07101e+18	140163000000000	35809400	0.0369552	4.53406e-13	4.64436e-25	4.02187e+20	3.21216e+19	8919030000000	0.00018442	9.71075e-36	2.57862e-84	4.81323e-150	1.42603e-229	0
252.6	4.78653e+20	1.08653e+21	2.52222e+20	1.75251e+18	93288000000000	16432000	0.0102586	6.85401e-14	3.60551e-26	4.08839e+20	2.74019e+19	3724790000000	1.33572e-05	2.7082e-38	4.63701e-89	9.47546e-158	7.37948e-241	0
252.8	4.9206e+20	1.10217e+21	2.4232e+20	1.47361e+18	61227300000000	7347910	0.00273107	9.74597e-15	2.57759e-27	4.15228e+20	2.30884e+19	1466310000000	8.13204e-07	5.13067e-41	4.07269e-94	5.83334e-166	6.96488e-253	0
253	5.05771e+20	1.11739e+21	2.32269e+20	1.23096e+18	39604200000000	3198600	0.000696083	1.30028e-15	1.6912e-28	4.21309e+20	1.91942e+19	541308000000	4.09864e-08	6.3824e-44	1.64052e-99	1.01401e-174	1.03246e-265	0
253.2	5.19793e+20	1.13216e+21	2.221e+20	1.02122e+18	25232100000000	1353920	0.000169546	1.62341e-16	1.01475e-29	4.27033e+20	1.57249e+19	186318000000	1.68142e-09	5.02015e-47	2.82589e-105	4.443e-184	2.03584e-279	0
253.4	5.3413e+20	1.14644e+21	2.11846e+20	8.41188e+17	15823700000000	556616	3.93899e-05	1.89144e-17	5.54726e-31	4.32347e+20	1.26786e+19	59411100000	5.50944e-11	2.39389e-50	1.92551e-111	4.32412e-194	4.43731e-294	0
253.6	5.48785e+20	1.16017e+21	2.01541e+20	6.87751e+17	9761490000000	221979	8.71137e-06	2.05047e-18	2.75193e-32	4.37192e+20	1.00456e+19	17425100000	1.4118e-12	6.60307e-54	4.75711e-118	8.11645e-205	0	0
253.8	5.63762e+20	1.1733e+21	1.91219e+20	5.57954e+17	5919320000000	85762.2	1.8301e-06	2.06194e-19	1.23376e-33	4.41503e+20	7.80853e+18	4663290000	2.76328e-14	9.9955e-58	3.86562e-125	2.50849e-216	0	0
254	5.79067e+20	1.18579e+21	1.80914e+20	4.49006e+17	3525790000000	32056.4	3.64408e-07	1.9171e-20	4.97684e-35	4.4521e+20	5.94355e+18	1128520000	4.02298e-16	7.82791e-62	9.26113e-133	1.06895e-228	0	0
254.2	5.94701e+20	1.19759e+21	1.70663e+20	3.58293e+17	2061250000000	11575.6	6.86131e-08	1.64238e-21	1.79807e-36	4.48236e+20	4.42068e+18	244468000	4.22856e-18	2.96769e-66	5.78371e-141	5.14348e-242	0	0
254.4	6.1067e+20	1.20863e+21	1.60501e+20	2.834e+17	1181790000000	4031.98	1.2186e-08	1.29179e-22	5.78989e-38	4.50499e+20	3.2053e+18	46867200	3.1027e-20	5.05317e-71	8.19406e-150	2.23052e-256	0	0
254.6	6.26977e+20	1.21886e+21	1.50462e+20	2.22109e+17	663903000000	1352.52	2.03621e-09	9.29277e-24	1.65317e-39	4.51909e+20	2.2595e+18	7849160	1.52982e-22	3.54994e-76	2.25023e-159	6.75426e-272	0	0
254.8	6.43625e+20	1.22822e+21	1.40582e+20	1.72409e+17	365117000000	436.201	3.19221e-10	6.08956e-25	4.16284e-41	4.52369e+20	1.54382e+18	1131620	4.85408e-25	9.34408e-82	1.00189e-169	1.06888e-288	0	0
255	6.60618e+20	1.23667e+21	1.30894e+20	1.32493e+17	196382000000	135.01	4.68178e-11	3.61965e-26	9.1918e-43	4.51775e+20	1.01885e+18	138112	9.43474e-28	8.25715e-88	5.90078e-181	0	0	0
255.2	6.77957e+20	1.24413e+21	1.21432e+20	1.00755e+17	103197000000	40.0277	6.40393e-12	1.94284e-27	1.76897e-44	4.50016e+20	6.4688e+17	13999	1.06179e-30	2.1607e-94	3.64306e-193	0	0	0
255.4	6.95647e+20	1.25055e+21	1.12227e+20	7.57826e+16	52925600000	11.3449	8.14306e-13	9.37197e-29	2.94826e-46	4.46974e+20	3.93328e+17	1152.81	6.48565e-34	1.44973e-101	1.80544e-206	0	0	0
255.6	7.13689e+20	1.25586e+21	1.03308e+20	5.63483e+16	26460400000	3.0674	9.59274e-14	4.04264e-30	4.22664e-48	4.42525e+20	2.27835e+17	75.2017	1.99589e-37	2.1129e-109	5.28151e-221	0	0	0
255.8	7.32086e+20	1.26e+21	9.47035e+19	4.13964e+16	12880600000	0.789391	1.04311e-14	1.55105e-31	5.17477e-50	4.36542e+20	1.24962e+17	3.77395	2.83916e-41	5.52165e-118	6.39148e-237	0	0	0
256	7.5084e+20	1.26292e+21	8.64387e+19	3.00308e+16	6097130000	0.192901	1.04299e-15	5.26334e-33	5.3697e-52	4.28893e+20	6.44411e+16	0.140834	1.68917e-45	2.07064e-127	2.11737e-254	0	0	0
256.2	7.69951e+20	1.26455e+21	7.85364e+19	2.14995e+16	2802700000	0.0446484	9.55016e-17	1.57027e-34	4.68458e-54	4.19445e+20	3.09881e+16	0.0037561	3.74031e-50	8.59212e-138	1.1861e-273	0	0	0
256.4	7.89421e+20	1.26482e+21	7.10163e+19	1.51798e+16	1249290000	0.00976207	7.97339e-18	4.09267e-36	3.40672e-56	4.08071e+20	1.37619e+16	6.83436e-05	2.68823e-55	2.90868e-149	6.3865e-295	0	0	0
256.6	8.09251e+20	1.26367e+21	6.38953e+19	1.05628e+16	539163000	0.00201053	6.04193e-19	9.25613e-38	2.04646e-58	3.9465e+20	5580410000000000	8.03139e-07	5.33721e-61	5.60916e-162	0	0	0	0
256.8	8.2944e+20	1.26105e+21	5.71868e+19	7238620000000000	224926000	0.00038887	4.13507e-20	1.80357e-39	1.00572e-60	3.79076e+20	2038440000000000	5.71235e-09	2.41797e-67	4.02562e-176	0	0	0	0
257	8.49988e+20	1.2569e+21	5.09007e+19	4881510000000000	90546400	7.04089e-05	2.54277e-21	3.00475e-41	4.00225e-63	3.61267e+20	660066000000000	2.27587e-11	1.99033e-74	6.47292e-192	0	0	0	0
257.2	8.70895e+20	1.25115e+21	4.50434e+19	3236810000000000	35108800	1.18932e-05	1.39715e-22	4.24559e-43	1.27567e-65	3.41176e+20	185845000000000	4.62862e-14	2.26474e-82	1.26844e-209	0	0	0	0
257.4	8.92159e+20	1.24376e+21	3.96177e+19	2108440000000000	13086400	1.86743e-06	6.81913e-24	5.04398e-45	3.21911e-68	3.18805e+20	44448600000000	4.29533e-17	2.56044e-91	1.45181e-229	0	0	0	0
257.6	9.13776e+20	1.23466e+21	3.46226e+19	1347970000000000	4679300	2.71505e-07	2.93792e-25	4.99252e-47	6.35199e-71	2.9422e+20	8777820000000	1.58665e-20	1.92436e-101	3.96533e-252	0	0	0	0
257.8	9.35745e+20	1.22383e+21	3.00534e+19	844973000000000	1601500	3.64005e-08	1.10985e-26	4.0768e-49	9.67213e-74	2.67576e+20	1382350000000	1.97316e-24	5.87266e-113	8.62e-278	0	0	0	0
258	9.58061e+20	1.2112e+21	2.59021e+19	518777000000000	523392	4.48042e-09	3.65004e-28	2.71785e-51	1.12059e-76	2.39136e+20	166281000000	6.71461e-29	3.95405e-126	0	0	0	0	0
258.2	9.80719e+20	1.19674e+21	2.21572e+19	311603000000000	162921	5.03927e-10	1.0371e-29	1.46278e-53	9.7306e-80	2.09296e+20	14477500000	4.82636e-34	2.74151e-141	0	0	0	0	0
258.4	1.00371e+21	1.18042e+21	1.88042e+19	182883000000000	48172.5	5.15307e-11	2.52514e-31	6.28043e-56	6.23165e-83	1.78605e+20	852464000	5.2851e-40	7.48234e-159	0	0	0	0	0
258.6	1.02704e+21	1.16222e+21	1.58257e+19	104745000000000	13490.5	4.76513e-12	5.22275e-33	2.12372e-58	2.893e-86	1.4778e+20	31127600	5.81011e-47	2.35553e-179	0	0	0	0	0
258.8	1.05068e+21	1.14211e+21	1.32017e+19	58461600000000	3567.09	3.96176e-13	9.09059e-35	5.57894e-61	9.55772e-90	1.17705e+20	630150	3.7402e-55	1.75031e-203	0	0	0	0	0
259	1.07464e+21	1.12009e+21	1.09103e+19	31749500000000	887.578	2.94318e-14	1.31827e-36	1.12194e-63	2.20304e-93	8.93969e+19	6106.63	6.95603e-65	3.83805e-232	0	0	0	0	0
259.2	1.0989e+21	1.09616e+21	8.92782e+18	16750700000000	207.085	1.9408e-15	1.57566e-38	1.70022e-66	3.46836e-97	6.39335e+19	23.2996	1.45956e-76	1.56039e-266	0	0	0	0	0
259.4	1.12345e+21	1.07032e+21	7.2294e+18	8570540000000	45.1307	1.12792e-16	1.53439e-40	1.90896e-69	3.64542e-101	4.23261e+19	0.0268625	9.67059e-91	0	0	0	0	0	0
259.6	1.14827e+21	1.04261e+21	5.7894e+18	4244790000000	9.14905	5.73299e-18	1.20233e-42	1.55933e-72	2.49593e-105	2.53358e+19	6.49332e-06	3.48594e-108	0	0	0	0	0	0
259.8	1.17335e+21	1.01306e+21	4.58188e+18	2031000000000	1.71763	2.52757e-19	7.48009e-45	9.08683e-76	1.08419e-109	1.32636e+19	1.96399e-10	5.70477e-130	0	0	0	0	0	0
260	1.19867e+21	9.81721e+20	3.58108e+18	936766000000	0.297197	9.58038e-21	3.64183e-47	3.69866e-79	2.90406e-114	5.78712e+18	3.51844e-16	1.15968e-157	0	0	0	0	0	0
260.2	1.22422e+21	9.48652e+20	2.76187e+18	415539000000	0.0471494	3.09207e-22	1.36616e-49	1.02787e-82	4.6515e-119	1.95835e+18	1.22223e-23	1.35932e-193	0	0	0	0	0	0
260.4	1.24995e+21	9.13939e+20	2.10011e+18	176833000000	0.00682014	8.41016e-24	3.88281e-52	1.90284e-86	4.30989e-124	4.59855e+17	1.46426e-33	2.26389e-241	0	0	0	0	0	0
260.6	1.27587e+21	8.77677e+20	1.57299e+18	71995100000	0.000894071	1.90625e-25	8.21037e-55	2.28496e-90	2.22869e-129	6.26208e+16	3.73379e-47	0	0	0	0	0	0	0
260.8	1.30192e+21	8.39983e+20	1.15938e+18	27961400000	0.000105528	3.55719e-27	1.26649e-57	1.72924e-94	6.18709e-135	3646350000000000	1.79121e-66	0	0	0	0	0	0	0
261	1.32809e+21	8.00988e+20	8.3998e+17	10326300000	1.11353e-05	5.39359e-29	1.39509e-60	7.99417e-99	8.841e-141	52308700000000	3.10555e-95	0	0	0	0	0	0	0
261.2	1.35433e+21	7.60845e+20	5.97512e+17	3613780000	1.04239e-06	6.55078e-31	1.07227e-63	2.18229e-103	6.21245e-147	62588300000	9.75241e-141	0	0	0	0	0	0	0
261.4	1.38061e+21	7.19724e+20	4.16778e+17	1193930000	8.58458e-08	6.27505e-33	5.60772e-67	3.3906e-108	2.04276e-153	582194	5.62739e-219	0	0	0	0	0	0	0
261.6	1.40688e+21	6.77813e+20	2.84669e+17	370866000	6.16328e-09	4.66146e-35	1.94158e-70	2.88044e-113	2.9779e-160	9.80027e-05	0	0	0	0	0	0	0	0
261.8	1.4331e+21	6.35319e+20	1.90106e+17	107831000	3.81944e-10	2.63644e-37	4.31968e-74	1.28083e-118	1.8146e-167	9.21136e-28	0	0	0	0	0	0	0	0
262	1.45922e+21	5.92465e+20	1.23923e+17	29204500	2.02107e-11	1.11273e-39	5.9777e-78	2.84229e-124	4.33444e-175	9.04209e-106	0	0	0	0	0	0	0	0
262.2	1.48517e+21	5.4949e+20	7.87097e+16	7328640	9.02425e-13	3.42853e-42	4.96527e-82	2.98786e-130	3.78331e-183	0	0	0	0	0	0	0	0	0
262.4	1.51089e+21	5.06645e+20	4.86143e+16	1694100	3.35632e-14	7.52901e-45	2.38097e-86	1.40537e-136	1.11741e-191	0	0	0	0	0	0	0	0	0
262.6	1.5363e+21	4.64195e+20	2.91352e+16	358448	1.0251e-15	1.14774e-47	6.31548e-91	2.7784e-143	1.02648e-200	0	0	0	0	0	0	0	0	0
262.8	1.56134e+21	4.22411e+20	1.69027e+16	68935	2.53127e-17	1.17992e-50	8.84128e-96	2.15538e-150	2.67346e-210	0	0	0	0	0	0	0	0	0
263	1.58591e+21	3.81567e+20	9467620000000000	11957.2	4.96727e-19	7.924e-54	6.20364e-101	6.08335e-158	1.78291e-220	0	0	0	0	0	0	0	0	0
263.2	1.60991e+21	3.41937e+20	5105250000000000	1854.84	7.60121e-21	3.35638e-57	2.06097e-106	5.74709e-166	2.72106e-231	0	0	0	0	0	0	0	0	0
263.4	1.63324e+21	3.03791e+20	2641800000000000	254.912	8.88274e-23	8.62577e-61	3.04421e-112	1.6575e-174	8.39507e-243	0	0	0	0	0	0	0	0	0
263.6	1.65578e+21	2.67386e+20	1307240000000000	30.7161	7.74564e-25	1.28852e-64	1.86478e-118	1.31799e-183	4.56417e-255	0	0	0	0	0	0	0	0	0
263.8	1.67741e+21	2.3296e+20	616144000000000	3.20796	4.91208e-27	1.06681e-68	4.38537e-125	2.58076e-193	3.75514e-268	0	0	0	0	0	0	0	0	0
264	1.69798e+21	2.0073e+20	275417000000000	0.286694	2.20182e-29	4.64323e-73	3.63377e-132	1.09754e-203	3.94759e-282	0	0	0	0	0	0	0	0	0
264.2	1.71733e+21	1.70882e+20	116192000000000	0.021614	6.75775e-32	1.00165e-77	9.64234e-140	8.81433e-215	4.39146e-297	0	0	0	0	0	0	0	0	0
264.4	1.73529e+21	1.43562e+20	46014000000000	0.0013529	1.37063e-34	1.00279e-82	7.36464e-148	1.14348e-226	0	0	0	0	0	0	0	0	0	0
264.6	1.75168e+21	1.18878e+20	17002000000000	6.90657e-05	1.7656e-37	4.3286e-88	1.43686e-156	2.01205e-239	0	0	0	0	0	0	0	0	0	0
264.8	1.76628e+21	9.68869e+19	5821730000000	2.81866e-06	1.38155e-40	7.4176e-94	6.26312e-166	3.94683e-253	0	0	0	0	0	0	0	0	0	0
265	1.77887e+21	7.75962e+19	1833280000000	8.99148e-08	6.24565e-44	4.59846e-100	5.24598e-176	6.92218e-268	0	0	0	0	0	0	0	0	0	0
265.2	1.78919e+21	6.09608e+19	526360000000	2.18576e-09	1.54157e-47	9.28699e-107	7.1232e-187	8.46289e-284	0	0	0	0	0	0	0	0	0	0
265.4	1.79698e+21	4.68828e+19	136450000000	3.9344e-11	1.94864e-51	5.42682e-114	1.29353e-198	5.82206e-301	0	0	0	0	0	0	0	0	0	0
265.6	1.80192e+21	3.52152e+19	31585900000	5.07575e-13	1.17312e-55	8.0198e-122	2.52518e-211	0	0	0	0	0	0	0	0	0	0	0
265.8	1.8037e+21	2.57668e+19	6447020000	4.5221e-15	3.09656e-60	2.57134e-130	4.13261e-225	0	0	0	0	0	0	0	0	0	0	0
266	1.80195e+21	1.83107e+19	1143700000	2.66669e-17	3.26061e-65	1.50132e-139	4.26749e-240	0	0	0	0	0	0	0	0	0	0	0
266.2	1.7963e+21	1.25942e+19	173449000	9.91448e-20	1.22897e-70	1.30579e-149	2.00739e-256	0	0	0	0	0	0	0	0	0	0	0
266.4	1.78632e+21	8.35105e+18	22063600	2.1974e-22	1.46362e-76	1.34263e-160	2.95603e-274	0	0	0	0	0	0	0	0	0	0	0
266.6	1.77155e+21	5.31411e+18	2302880	2.72131e-25	4.76816e-83	1.24934e-172	8.83365e-294	0	0	0	0	0	0	0	0	0	0	0
266.8	1.75154e+21	3.22801e+18	192253	1.74683e-28	3.59444e-90	7.71513e-186	0	0	0	0	0	0	0	0	0	0	0	0
267	1.72576e+21	1.86024e+18	12461	5.32452e-32	5.15861e-98	2.2024e-200	0	0	0	0	0	0	0	0	0	0	0	0
267.2	1.69369e+21	1.00968e+18	605.575	6.95498e-36	1.12144e-106	1.90255e-216	0	0	0	0	0	0	0	0	0	0	0	0
267.4	1.65479e+21	5.11766e+17	21.1778	3.4499e-40	2.82126e-116	3.01981e-234	0	0	0	0	0	0	0	0	0	0	0	0
267.6	1.6085e+21	2.39798e+17	0.507664	5.63197e-45	5.97177e-127	4.87805e-254	0	0	0	0	0	0	0	0	0	0	0	0
267.8	1.55431e+21	1.02631e+17	0.00787225	2.5517e-50	7.27559e-139	3.96775e-276	0	0	0	0	0	0	0	0	0	0	0	0
268	1.49171e+21	3.95462e+16	7.3672e-05	2.6157e-56	3.23679e-152	5.04123e-301	0	0	0	0	0	0	0	0	0	0	0	0
268.2	1.42028e+21	1.34822e+16	3.82656e-07	4.74104e-63	3.03651e-167	0	0	0	0	0	0	0	0	0	0	0	0	0
268.4	1.33973e+21	3981640000000000	9.96324e-10	1.12603e-70	3.0817e-184	0	0	0	0	0	0	0	0	0	0	0	0	0
268.6	1.24994e+21	992534000000000	1.14791e-12	2.42768e-79	1.4937e-203	0	0	0	0	0	0	0	0	0	0	0	0	0
268.8	1.15104e+21	202257000000000	5.01645e-16	3.0186e-89	1.25898e-225	0	0	0	0	0	0	0	0	0	0	0	0	0
269	1.04353e+21	32373000000000	6.86106e-20	1.22947e-100	5.23429e-251	0	0	0	0	0	0	0	0	0	0	0	0	0
269.2	9.28378e+20	3870180000000	2.30528e-24	8.04283e-114	2.19464e-280	0	0	0	0	0	0	0	0	0	0	0	0	0
269.4	8.07152e+20	324114000000	1.39768e-29	3.40839e-129	0	0	0	0	0	0	0	0	0	0	0	0	0	0
269.6	6.82155e+20	17505300000	1.02716e-35	2.90111e-147	0	0	0	0	0	0	0	0	0	0	0	0	0	0
269.8	5.56521e+20	547259000	5.43866e-43	1.07284e-168	0	0	0	0	0	0	0	0	0	0	0	0	0	0
270	4.34247e+20	8579030	1.04011e-51	2.2588e-194	0	0	0	0	0	0	0	0	0	0	0	0	0	0
270.2	3.20055e+20	55559.6	2.82827e-62	1.74177e-225	0	0	0	0	0	0	0	0	0	0	0	0	0	0
270.4	2.19021e+20	113.853	3.03106e-75	1.12702e-263	0	0	0	0	0	0	0	0	0	0	0	0	0	0
270.6	1.35838e+20	0.0507335	2.10619e-91	0	0	0	0	0	0	0	0	0	0	0	0	0	0	0
270.8	7.37382e+19	2.86188e-06	7.02631e-112	0	0	0	0	0	0	0	0	0	0	0	0	0	0	0
271	3.32675e+19	9.15224e-12	2.35834e-138	0	0	0	0	0	0	0	0	0	0	0	0	0	0	0
271.2	1.15203e+19	4.82888e-19	2.09794e-173	0	0	0	0	0	0	0	0	0	0	0	0	0	0	0
271.4	2.69611e+18	5.82972e-29	3.6829e-221	0	0	0	0	0	0	0	0	0	0	0	0	0	0	0
271.6	3.44257e+17	5.81011e-43	1.45883e-288	0	0	0	0	0	0	0	0	0	0	0	0	0	0	0
271.8	1.63561e+16	1.25836e-63	0	0	0	0	0	0	0	0	0	0	0	0	0	0	0	0
272	137953000000000	6.0889e-96	0	0	0	0	0	0	0	0	0	0	0	0	0	0	0	0
272.2	42246000000	1.32251e-150	0	0	0	0	0	0	0	0	0	0	0	0	0	0	0	0
272.4	9214.25	4.09619e-254	0	0	0	0	0	0	0	0	0	0	0	0	0	0	0	0
272.6	7.99912e-12	0	0	0	0	0	0	0	0	0	0	0	0	0	0	0	0	0
272.8	1.03587e-58	0	0	0	0	0	0	0	0	0	0	0	0	0	0	0	0	0
273	0	0	0	0	0	0	0	0	0	0	0	0	0	0	0	0	0	0

## Sheet: Fig6NNF
		T(K)	ζ	JNNF_SW1 (cm-2 s-1)	JNNF_SW09 (cm-2 s-1)
		190	0	6575130000000000	1040240000000000
		190.2	0	6803470000000000	1029040000000000
		190.4	0	7036020000000000	1016640000000000
		190.6	0	7272660000000000	1003060000000000
		190.8	0	7513260000000000	988333000000000
		191	0	7757650000000000	972507000000000
		191.2	0	8005660000000000	955622000000000
		191.4	0	8257130000000000	937727000000000
		191.6	0	8511840000000000	918872000000000
		191.8	0	8769580000000000	899114000000000
		192	0	9030130000000000	878511000000000
		192.2	0	9293240000000000	857125000000000
		192.4	0	9558650000000000	835021000000000
		192.6	0	9826100000000000	812265000000000
		192.8	0	1.00953e+16	788927000000000
		193	0	1.03659e+16	765079000000000
		193.2	0	1.06377e+16	740791000000000
		193.4	0	1.09102e+16	716139000000000
		193.6	0	1.11832e+16	691195000000000
		193.8	0	1.14562e+16	666035000000000
		194	0	1.1729e+16	640731000000000
		194.2	0	1.20011e+16	615357000000000
		194.4	0	1.22721e+16	589985000000000
		194.6	0	1.25415e+16	564686000000000
		194.8	0	1.28091e+16	539530000000000
		195	0	1.30743e+16	514581000000000
		195.2	0	1.33367e+16	489906000000000
		195.4	0	1.35958e+16	465564000000000
		195.6	0	1.38512e+16	441616000000000
		195.8	0	1.41024e+16	418114000000000
		196	0	1.43489e+16	395110000000000
		196.2	0	1.45903e+16	372652000000000
		196.4	0	1.4826e+16	350783000000000
		196.6	0	1.50556e+16	329541000000000
		196.8	0	1.52786e+16	308962000000000
		197	0	1.54945e+16	289076000000000
		197.2	0	1.57028e+16	269908000000000
		197.4	0	1.5903e+16	251479000000000
		197.6	0	1.60947e+16	233808000000000
		197.8	0	1.62773e+16	216906000000000
		198	0	1.64504e+16	200783000000000
		198.2	0	1.66136e+16	185442000000000
		198.4	0	1.67664e+16	170884000000000
		198.6	0	1.69084e+16	157104000000000
		198.8	0	1.70392e+16	144098000000000
		199	0	1.71583e+16	131853000000000
		199.2	0	1.72654e+16	120357000000000
		199.4	0	1.73601e+16	109594000000000
		199.6	0	1.74421e+16	99543300000000
		199.8	0	1.75111e+16	90185400000000
		200	0	1.75667e+16	81496700000000
		200.2	0	1.76087e+16	73452200000000
		200.4	0	1.76369e+16	66025500000000
		200.6	0	1.7651e+16	59189300000000
		200.8	0	1.7651e+16	52915000000000
		201	0	1.76365e+16	47173600000000
		201.2	0	1.76075e+16	41935700000000
		201.4	0	1.7564e+16	37171700000000
		201.6	0	1.75058e+16	32852200000000
		201.8	0	1.7433e+16	28947900000000
		202	0	1.73456e+16	25430200000000
		202.2	0	1.72436e+16	22270900000000
		202.4	0	1.71272e+16	19442900000000
		202.6	0	1.69964e+16	16919800000000
		202.8	0	1.68515e+16	14676300000000
		203	0	1.66927e+16	12688100000000
		203.2	0	1.65202e+16	10932400000000
		203.4	0	1.63343e+16	9387430000000
		203.6	0	1.61353e+16	8032700000000
		203.8	0	1.59236e+16	6849110000000
		204	0	1.56995e+16	5818850000000
		204.2	0	1.54636e+16	4925410000000
		204.4	0	1.52162e+16	4153560000000
		204.6	0	1.49578e+16	3489340000000
		204.8	0	1.4689e+16	2919980000000
		205	0	1.44104e+16	2433880000000
		205.2	0	1.41224e+16	2020540000000
		205.4	0	1.38257e+16	1670540000000
		205.6	0	1.3521e+16	1375410000000
		205.8	0	1.32088e+16	1127600000000
		206	0	1.28898e+16	920447000000
		206.2	0	1.25647e+16	748035000000
		206.4	0	1.22342e+16	605187000000
		206.6	0	1.1899e+16	487376000000
		206.8	0	1.15598e+16	390667000000
		207	0	1.12173e+16	311658000000
		207.2	0	1.08722e+16	247423000000
		207.4	0	1.05252e+16	195456000000
		207.6	0	1.01771e+16	153625000000
		207.8	0	9828560000000000	120126000000
		208	0	9480230000000000	93439400000
		208.2	0	9132830000000000	72292600000
		208.4	0	8787030000000000	55626600000
		208.6	0	8443480000000000	42564400000
		208.8	0	8102820000000000	32384600000
		209	0	7765650000000000	24496600000
		209.2	0	7432580000000000	18420400000
		209.4	0	7104160000000000	13767800000
		209.6	0	6780930000000000	10226900000
		209.8	0	6463400000000000	7548890000
		210	0	6152040000000000	5536380000
		210.2	0	5847290000000000	4033780000
		210.4	0	5549570000000000	2919320000
		210.6	0	5259260000000000	2098310000
		210.8	0	4976690000000000	1497670000
		211	0	4702160000000000	1061330000
		211.2	0	4435950000000000	746635000
		211.4	0	4178280000000000	521338000
		211.6	0	3929350000000000	361253000
		211.8	0	3689320000000000	248378000
		212	0	3458300000000000	169413000
		212.2	0	3236380000000000	114614000
		212.4	0	3023630000000000	76895400
		212.6	0	2820040000000000	51151600
		212.8	0	2625620000000000	33730900
		213	0	2440300000000000	22045500
		213.2	0	2264020000000000	14277300
		213.4	0	2096670000000000	9160370
		213.6	0	1938120000000000	5821430
		213.8	0	1788220000000000	3663510
		214	0	1646790000000000	2282540
		214.2	0	1513620000000000	1407620
		214.4	0	1388500000000000	859012
		214.6	0	1271190000000000	518617
		214.8	0	1161450000000000	309683
		215	0	1059000000000000	182851
		215.2	0	963581000000000	106725
		215.4	0	874904000000000	61560.5
		215.6	0	792681000000000	35081.7
		215.8	0	716616000000000	19745.6
		216	0	646412000000000	10973.4
		216.2	0	581771000000000	6019.4
		216.4	0	522393000000000	3258.11
		216.6	0	467983000000000	1739.53
		216.8	0	418247000000000	915.808
		217	0	372897000000000	475.253
		217.2	0	331651000000000	243.016
		217.4	0	294233000000000	122.397
		217.6	0	260377000000000	60.6962
		217.8	0	229824000000000	29.6232
		218	0	202325000000000	14.2234
		218.2	0	177644000000000	6.71562
		218.4	0	155551000000000	3.11667
		218.6	0	135832000000000	1.42108
		218.8	0	118281000000000	0.636299
		219	0	102705000000000	0.279648
		219.2	0	88922300000000	0.120573
		219.4	0	76762700000000	0.0509742
		219.6	0	66067700000000	0.0211194
		219.8	0	56689700000000	0.0085704
		220	0	48492400000000	0.00340457
		220.2	0	41349700000000	0.00132314
		220.4	0	35146200000000	0.00050277
		220.6	0	29776000000000	0.000186671
		220.8	0	25142700000000	6.76777e-05
		221	0	21158800000000	2.39432e-05
		221.2	0	17745000000000	8.26005e-06
		221.4	0	14830000000000	2.77673e-06
		221.6	0	12349800000000	9.08888e-07
		221.8	0	10247200000000	2.89452e-07
		222	0	8471240000000	8.96161e-08
		222.2	0	6976860000000	2.69511e-08
		222.4	0	5724200000000	7.86641e-09
		222.6	0	4678210000000	2.22638e-09
		222.8	0	3808260000000	6.10443e-10
		223	0	3087620000000	1.61994e-10
		223.2	0	2493100000000	4.15653e-11
		223.4	0	2004670000000	1.03014e-11
		223.6	0	1605100000000	2.46338e-12
		223.8	0	1279620000000	5.67754e-13
		224	0	1015650000000	1.25975e-13
		224.2	0	802532000000	2.68772e-14
		224.4	0	631242000000	5.50718e-15
		224.6	0	494209000000	1.08234e-15
		224.8	0	385096000000	2.03753e-16
		225	0	298629000000	3.66909e-17
		225.2	0	230443000000	6.31102e-18
		225.4	0	176939000000	1.03534e-18
		225.6	0	135167000000	1.61745e-19
		225.8	0	102722000000	2.4024e-20
		226	0	77654400000	3.38687e-21
		226.2	0	58388700000	4.5241e-22
		226.4	0	43662800000	5.71556e-23
		226.6	0	32469000000	6.81642e-24
		226.8	0	24008000000	7.65895e-25
		227	0	17649200000	8.0911e-26
		227.2	0	12898200000	8.01941e-27
		227.4	0	9369650000	7.44057e-28
		227.6	0	6764800000	6.44747e-29
		227.8	0	4853710000	5.20522e-30
		228	0	3460420000	3.90532e-31
		228.2	0	2451140000	2.71579e-32
		228.4	0	1724790000	1.74566e-33
		228.6	0	1205530000	1.03418e-34
		228.8	0	836838000	5.62984e-36
		229	0	576852000	2.80735e-37
		229.2	0	394812000	1.27811e-38
		229.4	0	268262000	5.29435e-40
		229.6	0	180930000	1.98823e-41
		229.8	0	121110000	6.74364e-43
		230	0	80445500	2.05767e-44
		230.2	0	53016900	5.62491e-46
		230.4	0	34661700	1.37159e-47
		230.6	0	22477000	2.96982e-49
		230.8	0	14454700	5.6827e-51
		231	0	9217100	9.56139e-53
		231.2	0	5826620	1.40715e-54
		231.4	0	3650920	1.80141e-56
		231.6	0	2267120	1.99439e-58
		231.8	0	1394940	1.8979e-60
		232	0	850282	1.54245e-62
		232.2	0	513352	1.06335e-64
		232.4	0	306923	6.17406e-67
		232.6	0	181684	2.99658e-69
		232.8	0	106461	1.20614e-71
		233	0	61738.9	3.99255e-74
		233.2	0	35426.7	1.07733e-76
		233.4	0	20109.8	2.34766e-79
		233.6	0	11290.1	4.09101e-82
		233.8	0	6267.5	5.64164e-85
		234	0	3439.54	6.08928e-88
		234.2	0	1865.56	5.08438e-91
		234.4	0	999.797	3.24373e-94
		234.6	0	529.297	1.56058e-97
		234.8	0	276.732	5.5836e-101
		235	0	142.848	1.4639e-104
		235.2	0	72.7824	2.76856e-108
		235.4	0	36.5926	3.71445e-112
		235.6	0	18.1488	3.4731e-116
		235.8	0	8.87697	2.22079e-120
		236	0	4.28065	9.51733e-125
		236.2	0	2.03445	2.6755e-129
		236.4	0	0.952665	4.82188e-134
		236.6	0	0.439383	5.43636e-139
		236.8	0	0.199531	3.73512e-144
		237	0	0.0891852	1.52067e-149
		237.2	0	0.0392223	3.56007e-155
		237.4	0	0.0169657	4.64091e-161
		237.6	0	0.00721521	3.25441e-167
		237.8	0	0.00301573	1.18292e-173
		238	0	0.00123832	2.1416e-180
		238.2	0	0.000499331	1.85004e-187
		238.4	0	0.000197642	7.28107e-195
		238.6	0	7.67567e-05	1.242e-202
		238.8	0	2.92353e-05	8.70092e-211
		239	0	1.09157e-05	2.36175e-219
		239.2	0	3.99341e-06	2.33212e-228
		239.4	0	1.43079e-06	7.82429e-238
		239.6	0	5.01796e-07	8.2816e-248
		239.8	0	1.72177e-07	2.55134e-258
		240	0	5.77686e-08	2.09571e-269
		240.2	0	1.89425e-08	4.17171e-281
		240.4	0	6.06689e-09	1.81316e-293
		240.6	0	1.89683e-09	0
		240.8	0	5.78581e-10	0
		241	0	1.7207e-10	0
		241.2	0	4.98626e-11	0
		241.4	0	1.40698e-11	0
		241.6	0	3.86324e-12	0
		241.8	0	1.03148e-12	0
		242	0	2.67612e-13	0
		242.2	0	6.74157e-14	0
		242.4	0	1.64776e-14	0
		242.6	0	3.90443e-15	0
		242.8	0	8.96186e-16	0
		243	0	1.99089e-16	0
		243.2	0	4.27687e-17	0
		243.4	0	8.87648e-18	0
		243.6	0	1.77822e-18	0
		243.8	0	3.43509e-19	0
		244	0	6.39246e-20	0
		244.2	0	1.14478e-20	0
		244.4	0	1.97078e-21	0
		244.6	0	3.25785e-22	0
		244.8	0	5.16542e-23	0
		245	0	7.84592e-24	0
		245.2	0	1.14028e-24	0
		245.4	0	1.58362e-25	0
		245.6	0	2.0989e-26	0
		245.8	0	2.65116e-27	0
		246	0	3.18688e-28	0
		246.2	0	3.64033e-29	0
		246.4	0	3.94545e-30	0
		246.6	0	4.05081e-31	0
		246.8	0	3.93333e-32	0
		247	0	3.60585e-33	0
		247.2	0	3.11538e-34	0
		247.4	0	2.53203e-35	0
		247.6	0	1.93216e-36	0
		247.8	0	1.38155e-37	0
		248	0	9.23714e-39	0
		248.2	0	5.76256e-40	0
		248.4	0	3.34675e-41	0
		248.6	0	1.80528e-42	0
		248.8	0	9.02227e-44	0
		249	0	4.16712e-45	0
		249.2	0	1.774e-46	0
		249.4	0	6.94174e-48	0
		249.6	0	2.4896e-49	0
		249.8	0	8.15893e-51	0
		250	0	2.43566e-52	0
		250.2	0	6.60175e-54	0
		250.4	0	1.6191e-55	0
		250.6	0	3.58025e-57	0
		250.8	0	7.11136e-59	0
		251	0	1.26386e-60	0
		251.2	0	2.0016e-62	0
		251.4	0	2.81277e-64	0
		251.6	0	3.49163e-66	0
		251.8	0	3.81086e-68	0
		252	0	3.63906e-70	0
		252.2	0	3.02477e-72	0
		252.4	0	2.17666e-74	0
		252.6	0	1.34842e-76	0
		252.8	0	7.14856e-79	0
		253	0	3.223e-81	0
		253.2	0	1.22774e-83	0
		253.4	0	3.9243e-86	0
		253.6	0	1.04493e-88	0
		253.8	0	2.3002e-91	0
		254	0	4.15257e-94	0
		254.2	0	6.09635e-97	0
		254.4	0	7.21367e-100	0
		254.6	0	6.8155e-103	0
		254.8	0	5.09086e-106	0
		255	0	2.97505e-109	0
		255.2	0	1.34527e-112	0
		255.4	0	4.65228e-116	0
		255.6	0	1.21534e-119	0
		255.8	0	2.3672e-123	0
		256	0	3.3905e-127	0
		256.2	0	3.51899e-131	0
		256.4	0	2.60584e-135	0
		256.6	0	1.35421e-139	0
		256.8	0	4.85322e-144	0
		257	0	1.17732e-148	0
		257.2	0	1.89535e-153	0
		257.4	0	1.98273e-158	0
		257.6	0	1.3179e-163	0
		257.8	0	5.43457e-169	0
		258	0	1.3553e-174	0
		258.2	0	1.98919e-180	0
		258.4	0	1.66899e-186	0
		258.6	0	7.75995e-193	0
		258.8	0	1.9339e-199	0
		259	0	2.4928e-206	0
		259.2	0	1.59957e-213	0
		259.4	0	4.90394e-221	0
		259.6	0	6.87304e-229	0
		259.8	0	4.19948e-237	0
		260	0	1.06288e-245	0
		260.2	0	1.05458e-254	0
		260.4	0	3.86501e-264	0
		260.6	0	4.90661e-274	0
		260.8	0	2.01268e-284	0
		261	0	2.4741e-295	0
		261.2	0	0	0
		261.4	0	0	0
		261.6	0	0	0
		261.8	0	0	0
		262	0	0	0
		262.2	0	0	0
		262.4	0	0	0
		262.6	0	0	0
		262.8	0	0	0
		263	0	0	0
		263.2	0	0	0
		263.4	0	0	0
		263.6	0	0	0
		263.8	0	0	0
		264	0	0	0
		264.2	0	0	0
		264.4	0	0	0
		264.6	0	0	0
		264.8	0	0	0
		265	0	0	0
		265.2	0	0	0
		265.4	0	0	0
		265.6	0	0	0
		265.8	0	0	0
		266	0	0	0
		266.2	0	0	0
		266.4	0	0	0
		266.6	0	0	0
		266.8	0	0	0
		267	0	0	0
		267.2	0	0	0
		267.4	0	0	0
		267.6	0	0	0
		267.8	0	0	0
		268	0	0	0
		268.2	0	0	0
		268.4	0	0	0
		268.6	0	0	0
		268.8	0	0	0
		269	0	0	0
		269.2	0	0	0
		269.4	0	0	0
		269.6	0	0	0
		269.8	0	0	0
		270	0	0	0
		270.2	0	0	0
		270.4	0	0	0
		270.6	0	0	0
		270.8	0	0	0
		271	0	0	0
		271.2	0	0	0
		271.4	0	0	0
		271.6	0	0	0
		271.8	0	0	0
		272	0	0	0
		272.2	0	0	0
		272.4	0	0	0
		272.6	0	0	0
		272.8	0	0	0
		273	0	0	0
		190	0.05	1.66521e+16	1.09462e+16
		190.2	0.05	1.72977e+16	1.10912e+16
		190.4	0.05	1.79617e+16	1.1229e+16
		190.6	0.05	1.86444e+16	1.13592e+16
		190.8	0.05	1.93459e+16	1.14814e+16
		191	0.05	2.00662e+16	1.15952e+16
		191.2	0.05	2.08057e+16	1.17002e+16
		191.4	0.05	2.15642e+16	1.1796e+16
		191.6	0.05	2.2342e+16	1.18822e+16
		191.8	0.05	2.31389e+16	1.19586e+16
		192	0.05	2.39551e+16	1.20248e+16
		192.2	0.05	2.47905e+16	1.20805e+16
		192.4	0.05	2.56451e+16	1.21254e+16
		192.6	0.05	2.65187e+16	1.21592e+16
		192.8	0.05	2.74113e+16	1.21818e+16
		193	0.05	2.83227e+16	1.21928e+16
		193.2	0.05	2.92527e+16	1.21923e+16
		193.4	0.05	3.02011e+16	1.21799e+16
		193.6	0.05	3.11676e+16	1.21556e+16
		193.8	0.05	3.2152e+16	1.21194e+16
		194	0.05	3.31538e+16	1.20711e+16
		194.2	0.05	3.41727e+16	1.20107e+16
		194.4	0.05	3.52083e+16	1.19384e+16
		194.6	0.05	3.626e+16	1.18541e+16
		194.8	0.05	3.73274e+16	1.17579e+16
		195	0.05	3.84098e+16	1.16501e+16
		195.2	0.05	3.95066e+16	1.15307e+16
		195.4	0.05	4.06172e+16	1.14e+16
		195.6	0.05	4.17409e+16	1.12582e+16
		195.8	0.05	4.28768e+16	1.11057e+16
		196	0.05	4.40242e+16	1.09427e+16
		196.2	0.05	4.5182e+16	1.07696e+16
		196.4	0.05	4.63496e+16	1.05868e+16
		196.6	0.05	4.75257e+16	1.03948e+16
		196.8	0.05	4.87094e+16	1.01939e+16
		197	0.05	4.98997e+16	9984690000000000
		197.2	0.05	5.10953e+16	9767650000000000
		197.4	0.05	5.22951e+16	9543340000000000
		197.6	0.05	5.34978e+16	9312300000000000
		197.8	0.05	5.47021e+16	9075140000000000
		198	0.05	5.59067e+16	8832440000000000
		198.2	0.05	5.71101e+16	8584830000000000
		198.4	0.05	5.8311e+16	8332930000000000
		198.6	0.05	5.95078e+16	8077380000000000
		198.8	0.05	6.0699e+16	7818840000000000
		199	0.05	6.1883e+16	7557950000000000
		199.2	0.05	6.30582e+16	7295360000000000
		199.4	0.05	6.4223e+16	7031730000000000
		199.6	0.05	6.53755e+16	6767690000000000
		199.8	0.05	6.65142e+16	6503880000000000
		200	0.05	6.76372e+16	6240930000000000
		200.2	0.05	6.87428e+16	5979440000000000
		200.4	0.05	6.98291e+16	5720010000000000
		200.6	0.05	7.08944e+16	5463220000000000
		200.8	0.05	7.19367e+16	5209600000000000
		201	0.05	7.29542e+16	4959690000000000
		201.2	0.05	7.3945e+16	4713990000000000
		201.4	0.05	7.49073e+16	4472960000000000
		201.6	0.05	7.58392e+16	4237050000000000
		201.8	0.05	7.67388e+16	4006660000000000
		202	0.05	7.76042e+16	3782160000000000
		202.2	0.05	7.84337e+16	3563890000000000
		202.4	0.05	7.92253e+16	3352150000000000
		202.6	0.05	7.99774e+16	3147210000000000
		202.8	0.05	8.0688e+16	2949290000000000
		203	0.05	8.13555e+16	2758590000000000
		203.2	0.05	8.19782e+16	2575250000000000
		203.4	0.05	8.25545e+16	2399410000000000
		203.6	0.05	8.30828e+16	2231140000000000
		203.8	0.05	8.35614e+16	2070480000000000
		204	0.05	8.39891e+16	1917450000000000
		204.2	0.05	8.43643e+16	1772040000000000
		204.4	0.05	8.46858e+16	1634180000000000
		204.6	0.05	8.49524e+16	1503810000000000
		204.8	0.05	8.51628e+16	1380810000000000
		205	0.05	8.5316e+16	1265050000000000
		205.2	0.05	8.54111e+16	1156380000000000
		205.4	0.05	8.54472e+16	1054610000000000
		205.6	0.05	8.54235e+16	959546000000000
		205.8	0.05	8.53395e+16	870976000000000
		206	0.05	8.51946e+16	788669000000000
		206.2	0.05	8.49885e+16	712382000000000
		206.4	0.05	8.47207e+16	641864000000000
		206.6	0.05	8.43913e+16	576854000000000
		206.8	0.05	8.40002e+16	517085000000000
		207	0.05	8.35475e+16	462286000000000
		207.2	0.05	8.30335e+16	412186000000000
		207.4	0.05	8.24586e+16	366511000000000
		207.6	0.05	8.18232e+16	324992000000000
		207.8	0.05	8.11282e+16	287360000000000
		208	0.05	8.03743e+16	253354000000000
		208.2	0.05	7.95624e+16	222716000000000
		208.4	0.05	7.86937e+16	195199000000000
		208.6	0.05	7.77694e+16	170561000000000
		208.8	0.05	7.67909e+16	148572000000000
		209	0.05	7.57597e+16	129008000000000
		209.2	0.05	7.46774e+16	111661000000000
		209.4	0.05	7.35458e+16	96329600000000
		209.6	0.05	7.23668e+16	82826100000000
		209.8	0.05	7.11424e+16	70973300000000
		210	0.05	6.98748e+16	60606000000000
		210.2	0.05	6.85661e+16	51570200000000
		210.4	0.05	6.72187e+16	43723700000000
		210.6	0.05	6.58351e+16	36935000000000
		210.8	0.05	6.44178e+16	31083600000000
		211	0.05	6.29693e+16	26059500000000
		211.2	0.05	6.14924e+16	21762400000000
		211.4	0.05	5.99898e+16	18101900000000
		211.6	0.05	5.84643e+16	14996100000000
		211.8	0.05	5.69188e+16	12372000000000
		212	0.05	5.5356e+16	10164100000000
		212.2	0.05	5.3779e+16	8314340000000
		212.4	0.05	5.21907e+16	6771440000000
		212.6	0.05	5.05939e+16	5490210000000
		212.8	0.05	4.89917e+16	4431100000000
		213	0.05	4.73869e+16	3559650000000
		213.2	0.05	4.57824e+16	2846000000000
		213.4	0.05	4.4181e+16	2264380000000
		213.6	0.05	4.25857e+16	1792710000000
		213.8	0.05	4.09991e+16	1412110000000
		214	0.05	3.94239e+16	1106570000000
		214.2	0.05	3.78628e+16	862572000000
		214.4	0.05	3.63182e+16	668754000000
		214.6	0.05	3.47927e+16	515636000000
		214.8	0.05	3.32885e+16	395342000000
		215	0.05	3.18079e+16	301372000000
		215.2	0.05	3.03531e+16	228391000000
		215.4	0.05	2.89259e+16	172046000000
		215.6	0.05	2.75284e+16	128809000000
		215.8	0.05	2.61621e+16	95833900000
		216	0.05	2.48288e+16	70844600000
		216.2	0.05	2.35299e+16	52029000000
		216.4	0.05	2.22666e+16	37955300000
		216.6	0.05	2.10402e+16	27499300000
		216.8	0.05	1.98517e+16	19784500000
		217	0.05	1.8702e+16	14132400000
		217.2	0.05	1.75917e+16	10021200000
		217.4	0.05	1.65215e+16	7052880000
		217.6	0.05	1.54917e+16	4925840000
		217.8	0.05	1.45027e+16	3413380000
		218	0.05	1.35546e+16	2346380000
		218.2	0.05	1.26473e+16	1599710000
		218.4	0.05	1.17808e+16	1081510000
		218.6	0.05	1.09548e+16	724903000
		218.8	0.05	1.0169e+16	481615000
		219	0.05	9422740000000000	317103000
		219.2	0.05	8715520000000000	206865000
		219.4	0.05	8046600000000000	133679000
		219.6	0.05	7415190000000000	85552400
		219.8	0.05	6820390000000000	54211400
		220	0.05	6261230000000000	34004200
		220.2	0.05	5736680000000000	21108300
		220.4	0.05	5245620000000000	12964000
		220.6	0.05	4786910000000000	7875470
		220.8	0.05	4359340000000000	4730950
		221	0.05	3961680000000000	2809530
		221.2	0.05	3592650000000000	1648950
		221.4	0.05	3250970000000000	956185
		221.6	0.05	2935330000000000	547652
		221.8	0.05	2644430000000000	309712
		222	0.05	2376960000000000	172888
		222.2	0.05	2131620000000000	95231
		222.4	0.05	1907120000000000	51742.8
		222.6	0.05	1702210000000000	27722.1
		222.8	0.05	1515620000000000	14640.3
		223	0.05	1346170000000000	7618.26
		223.2	0.05	1192670000000000	3904.61
		223.4	0.05	1053980000000000	1970.34
		223.6	0.05	929002000000000	978.517
		223.8	0.05	816688000000000	478.05
		224	0.05	716029000000000	229.65
		224.2	0.05	626067000000000	108.43
		224.4	0.05	545890000000000	50.2949
		224.6	0.05	474640000000000	22.9074
		224.8	0.05	411506000000000	10.2398
		225	0.05	355730000000000	4.49
		225.2	0.05	306602000000000	1.93024
		225.4	0.05	263462000000000	0.813102
		225.6	0.05	225697000000000	0.335432
		225.8	0.05	192742000000000	0.135436
		226	0.05	164076000000000	0.0534899
		226.2	0.05	139223000000000	0.0206512
		226.4	0.05	117746000000000	0.00778881
		226.6	0.05	99249000000000	0.00286788
		226.8	0.05	83373400000000	0.00103018
		227	0.05	69794900000000	0.00036076
		227.2	0.05	58222200000000	0.00012307
		227.4	0.05	48394400000000	4.08677e-05
		227.6	0.05	40078900000000	1.31996e-05
		227.8	0.05	33069200000000	4.14315e-06
		228	0.05	27182500000000	1.26277e-06
		228.2	0.05	22257900000000	3.73384e-07
		228.4	0.05	18154300000000	1.07011e-07
		228.6	0.05	14748400000000	2.9698e-08
		228.8	0.05	11933000000000	7.97307e-09
		229	0.05	9615280000000	2.06862e-09
		229.2	0.05	7715260000000	5.18123e-10
		229.4	0.05	6164290000000	1.25142e-10
		229.6	0.05	4903720000000	2.91135e-11
		229.8	0.05	3883700000000	6.51621e-12
		230	0.05	3062020000000	1.40142e-12
		230.2	0.05	2403130000000	2.89241e-13
		230.4	0.05	1877230000000	5.72128e-14
		230.6	0.05	1459460000000	1.0831e-14
		230.8	0.05	1129180000000	1.95956e-15
		231	0.05	869354000000	3.38312e-16
		231.2	0.05	665962000000	5.56507e-17
		231.4	0.05	507554000000	8.70795e-18
		231.6	0.05	384818000000	1.29396e-18
		231.8	0.05	290220000000	1.82275e-19
		232	0.05	217699000000	2.42961e-20
		232.2	0.05	162405000000	3.05863e-21
		232.4	0.05	120479000000	3.62942e-22
		232.6	0.05	88868400000	4.05104e-23
		232.8	0.05	65172200000	4.24404e-24
		233	0.05	47512700000	4.16388e-25
		233.2	0.05	34430300000	3.81683e-26
		233.4	0.05	24797400000	3.26082e-27
		233.6	0.05	17748300000	2.58976e-28
		233.8	0.05	12622400000	1.90693e-29
		234	0.05	8918820000	1.2982e-30
		234.2	0.05	6260390000	8.14713e-32
		234.4	0.05	4364850000	4.69889e-33
		234.6	0.05	3022420000	2.48268e-34
		234.8	0.05	2078260000	1.19764e-35
		235	0.05	1418890000	5.25632e-37
		235.2	0.05	961700000	2.09117e-38
		235.4	0.05	647012000	7.51231e-40
		235.6	0.05	432020000	2.42702e-41
		235.8	0.05	286254000	7.02171e-43
		236	0.05	188186000	1.81111e-44
		236.2	0.05	122729000	4.14521e-46
		236.4	0.05	79389100	8.37738e-48
		236.6	0.05	50928300	1.48724e-49
		236.8	0.05	32394400	2.30678e-51
		237	0.05	20427700	3.10805e-53
		237.2	0.05	12768300	3.61588e-55
		237.4	0.05	7909170	3.60928e-57
		237.6	0.05	4854420	3.07046e-59
		237.8	0.05	2951690	2.21051e-61
		238	0.05	1777650	1.33677e-63
		238.2	0.05	1060180	6.73713e-66
		238.4	0.05	626018	2.80635e-68
		238.6	0.05	365910	9.57727e-71
		238.8	0.05	211666	2.65303e-73
		239	0.05	121151	5.9071e-76
		239.2	0.05	68596.1	1.0462e-78
		239.4	0.05	38412.6	1.45774e-81
		239.6	0.05	21269	1.57937e-84
		239.8	0.05	11641.7	1.31414e-87
		240	0.05	6297.6	8.28757e-91
		240.2	0.05	3365.98	3.90628e-94
		240.4	0.05	1777.11	1.35577e-97
		240.6	0.05	926.549	3.41044e-101
		240.8	0.05	476.929	6.11385e-105
		241	0.05	242.298	7.67165e-109
		241.2	0.05	121.459	6.61003e-113
		241.4	0.05	60.0572	3.83149e-117
		241.6	0.05	29.2836	1.46178e-121
		241.8	0.05	14.0758	3.58582e-126
		242	0.05	6.66756	5.51589e-131
		242.2	0.05	3.11147	5.17981e-136
		242.4	0.05	1.42995	2.88533e-141
		242.6	0.05	0.646965	9.24387e-147
		242.8	0.05	0.288064	1.64773e-152
		243	0.05	0.126178	1.5769e-158
		243.2	0.05	0.0543499	7.79699e-165
		243.4	0.05	0.0230126	1.91109e-171
		243.6	0.05	0.00957429	2.2206e-178
		243.8	0.05	0.0039124	1.16558e-185
		244	0.05	0.0015696	2.62323e-193
		244.2	0.05	0.000617943	2.39228e-201
		244.4	0.05	0.000238632	8.31501e-210
		244.6	0.05	9.03492e-05	1.03063e-218
		244.8	0.05	3.35217e-05	4.2377e-228
		245	0.05	1.21819e-05	5.34267e-238
		245.2	0.05	4.33384e-06	1.89546e-248
		245.4	0.05	1.50857e-06	1.72308e-259
		245.6	0.05	5.13521e-07	3.62268e-271
		245.8	0.05	1.70846e-07	1.57451e-283
		246	0.05	5.55202e-08	1.25078e-296
		246.2	0.05	1.76132e-08	0
		246.4	0.05	5.45128e-09	0
		246.6	0.05	1.64494e-09	0
		246.8	0.05	4.83625e-10	0
		247	0.05	1.38445e-10	0
		247.2	0.05	3.85609e-11	0
		247.4	0.05	1.04425e-11	0
		247.6	0.05	2.74738e-12	0
		247.8	0.05	7.01703e-13	0
		248	0.05	1.73843e-13	0
		248.2	0.05	4.17414e-14	0
		248.4	0.05	9.70532e-15	0
		248.6	0.05	2.18321e-15	0
		248.8	0.05	4.74704e-16	0
		249	0.05	9.96727e-17	0
		249.2	0.05	2.01894e-17	0
		249.4	0.05	3.94112e-18	0
		249.6	0.05	7.40627e-19	0
		249.8	0.05	1.3384e-19	0
		250	0.05	2.32316e-20	0
		250.2	0.05	3.8687e-21	0
		250.4	0.05	6.17316e-22	0
		250.6	0.05	9.42651e-23	0
		250.8	0.05	1.37568e-23	0
		251	0.05	1.91608e-24	0
		251.2	0.05	2.54338e-25	0
		251.4	0.05	3.21268e-26	0
		251.6	0.05	3.85577e-27	0
		251.8	0.05	4.38978e-28	0
		252	0.05	4.73302e-29	0
		252.2	0.05	4.82439e-30	0
		252.4	0.05	4.64056e-31	0
		252.6	0.05	4.20439e-32	0
		252.8	0.05	3.58089e-33	0
		253	0.05	2.86119e-34	0
		253.2	0.05	2.14016e-35	0
		253.4	0.05	1.4953e-36	0
		253.6	0.05	9.73619e-38	0
		253.8	0.05	5.89361e-39	0
		254	0.05	3.30836e-40	0
		254.2	0.05	1.71769e-41	0
		254.4	0.05	8.22599e-43	0
		254.6	0.05	3.62325e-44	0
		254.8	0.05	1.46345e-45	0
		255	0.05	5.4034e-47	0
		255.2	0.05	1.81781e-48	0
		255.4	0.05	5.55315e-50	0
		255.6	0.05	1.53491e-51	0
		255.8	0.05	3.8243e-53	0
		256	0.05	8.55548e-55	0
		256.2	0.05	1.71149e-56	0
		256.4	0.05	3.04838e-58	0
		256.6	0.05	4.81245e-60	0
		256.8	0.05	6.70202e-62	0
		257	0.05	8.19267e-64	0
		257.2	0.05	8.74489e-66	0
		257.4	0.05	8.106e-68	0
		257.6	0.05	6.48744e-70	0
		257.8	0.05	4.45571e-72	0
		258	0.05	2.60951e-74	0
		258.2	0.05	1.29443e-76	0
		258.4	0.05	5.40002e-79	0
		258.6	0.05	1.88046e-81	0
		258.8	0.05	5.42324e-84	0
		259	0.05	1.28461e-86	0
		259.2	0.05	2.47734e-89	0
		259.4	0.05	3.85366e-92	0
		259.6	0.05	4.78824e-95	0
		259.8	0.05	4.70315e-98	0
		260	0.05	3.61198e-101	0
		260.2	0.05	2.14385e-104	0
		260.4	0.05	9.71375e-108	0
		260.6	0.05	3.31625e-111	0
		260.8	0.05	8.41302e-115	0
		261	0.05	1.56281e-118	0
		261.2	0.05	2.09273e-122	0
		261.4	0.05	1.98676e-126	0
		261.6	0.05	1.31373e-130	0
		261.8	0.05	5.93747e-135	0
		262	0.05	1.7976e-139	0
		262.2	0.05	3.5683e-144	0
		262.4	0.05	4.53891e-149	0
		262.6	0.05	3.61014e-154	0
		262.8	0.05	1.74905e-159	0
		263	0.05	5.01878e-165	0
		263.2	0.05	8.27672e-171	0
		263.4	0.05	7.59581e-177	0
		263.6	0.05	3.7472e-183	0
		263.8	0.05	9.57388e-190	0
		264	0.05	1.21709e-196	0
		264.2	0.05	7.37358e-204	0
		264.4	0.05	2.03209e-211	0
		264.6	0.05	2.42273e-219	0
		264.8	0.05	1.18354e-227	0
		265	0.05	2.2339e-236	0
		265.2	0.05	1.52859e-245	0
		265.4	0.05	3.53891e-255	0
		265.6	0.05	2.57159e-265	0
		265.8	0.05	5.40542e-276	0
		266	0.05	3.00688e-287	0
		266.2	0.05	3.9075e-299	0
		266.4	0.05	0	0
		266.6	0.05	0	0
		266.8	0.05	0	0
		267	0.05	0	0
		267.2	0.05	0	0
		267.4	0.05	0	0
		267.6	0.05	0	0
		267.8	0.05	0	0
		268	0.05	0	0
		268.2	0.05	0	0
		268.4	0.05	0	0
		268.6	0.05	0	0
		268.8	0.05	0	0
		269	0.05	0	0
		269.2	0.05	0	0
		269.4	0.05	0	0
		269.6	0.05	0	0
		269.8	0.05	0	0
		270	0.05	0	0
		270.2	0.05	0	0
		270.4	0.05	0	0
		270.6	0.05	0	0
		270.8	0.05	0	0
		271	0.05	0	0
		271.2	0.05	0	0
		271.4	0.05	0	0
		271.6	0.05	0	0
		271.8	0.05	0	0
		272	0.05	0	0
		272.2	0.05	0	0
		272.4	0.05	0	0
		272.6	0.05	0	0
		272.8	0.05	0	0
		273	0.05	0	0
		190	0.1	3.09951e+16	3.65084e+16
		190.2	0.1	3.2209e+16	3.73486e+16
		190.4	0.1	3.34617e+16	3.81868e+16
		190.6	0.1	3.47541e+16	3.90216e+16
		190.8	0.1	3.6087e+16	3.98518e+16
		191	0.1	3.74611e+16	4.0676e+16
		191.2	0.1	3.88771e+16	4.14929e+16
		191.4	0.1	4.03358e+16	4.23009e+16
		191.6	0.1	4.18379e+16	4.30988e+16
		191.8	0.1	4.33841e+16	4.38849e+16
		192	0.1	4.4975e+16	4.46578e+16
		192.2	0.1	4.66114e+16	4.54159e+16
		192.4	0.1	4.82938e+16	4.61577e+16
		192.6	0.1	5.00228e+16	4.68815e+16
		192.8	0.1	5.17991e+16	4.75859e+16
		193	0.1	5.3623e+16	4.82691e+16
		193.2	0.1	5.54952e+16	4.89297e+16
		193.4	0.1	5.7416e+16	4.95659e+16
		193.6	0.1	5.93859e+16	5.01762e+16
		193.8	0.1	6.14053e+16	5.0759e+16
		194	0.1	6.34744e+16	5.13128e+16
		194.2	0.1	6.55936e+16	5.18359e+16
		194.4	0.1	6.7763e+16	5.23268e+16
		194.6	0.1	6.99828e+16	5.27841e+16
		194.8	0.1	7.22531e+16	5.32064e+16
		195	0.1	7.45739e+16	5.35921e+16
		195.2	0.1	7.69453e+16	5.39399e+16
		195.4	0.1	7.9367e+16	5.42486e+16
		195.6	0.1	8.1839e+16	5.4517e+16
		195.8	0.1	8.4361e+16	5.47437e+16
		196	0.1	8.69326e+16	5.49279e+16
		196.2	0.1	8.95535e+16	5.50683e+16
		196.4	0.1	9.22231e+16	5.51643e+16
		196.6	0.1	9.49408e+16	5.52148e+16
		196.8	0.1	9.77061e+16	5.52192e+16
		197	0.1	1.00518e+17	5.51769e+16
		197.2	0.1	1.03376e+17	5.50873e+16
		197.4	0.1	1.06278e+17	5.49501e+16
		197.6	0.1	1.09225e+17	5.47649e+16
		197.8	0.1	1.12214e+17	5.45317e+16
		198	0.1	1.15244e+17	5.42503e+16
		198.2	0.1	1.18314e+17	5.39208e+16
		198.4	0.1	1.21423e+17	5.35436e+16
		198.6	0.1	1.24568e+17	5.31189e+16
		198.8	0.1	1.27749e+17	5.26472e+16
		199	0.1	1.30962e+17	5.21292e+16
		199.2	0.1	1.34207e+17	5.15656e+16
		199.4	0.1	1.37481e+17	5.09574e+16
		199.6	0.1	1.40781e+17	5.03054e+16
		199.8	0.1	1.44106e+17	4.9611e+16
		200	0.1	1.47452e+17	4.88754e+16
		200.2	0.1	1.50818e+17	4.80999e+16
		200.4	0.1	1.54201e+17	4.72863e+16
		200.6	0.1	1.57596e+17	4.6436e+16
		200.8	0.1	1.61003e+17	4.5551e+16
		201	0.1	1.64417e+17	4.4633e+16
		201.2	0.1	1.67835e+17	4.3684e+16
		201.4	0.1	1.71254e+17	4.27062e+16
		201.6	0.1	1.74671e+17	4.17016e+16
		201.8	0.1	1.78081e+17	4.06726e+16
		202	0.1	1.8148e+17	3.96214e+16
		202.2	0.1	1.84866e+17	3.85504e+16
		202.4	0.1	1.88234e+17	3.7462e+16
		202.6	0.1	1.9158e+17	3.63588e+16
		202.8	0.1	1.949e+17	3.52431e+16
		203	0.1	1.9819e+17	3.41175e+16
		203.2	0.1	2.01444e+17	3.29846e+16
		203.4	0.1	2.04659e+17	3.18468e+16
		203.6	0.1	2.0783e+17	3.07067e+16
		203.8	0.1	2.10953e+17	2.95668e+16
		204	0.1	2.14023e+17	2.84295e+16
		204.2	0.1	2.17035e+17	2.72972e+16
		204.4	0.1	2.19984e+17	2.61723e+16
		204.6	0.1	2.22866e+17	2.5057e+16
		204.8	0.1	2.25675e+17	2.39537e+16
		205	0.1	2.28407e+17	2.28644e+16
		205.2	0.1	2.31057e+17	2.17912e+16
		205.4	0.1	2.3362e+17	2.07361e+16
		205.6	0.1	2.3609e+17	1.97008e+16
		205.8	0.1	2.38465e+17	1.8687e+16
		206	0.1	2.40737e+17	1.76965e+16
		206.2	0.1	2.42903e+17	1.67306e+16
		206.4	0.1	2.44958e+17	1.57906e+16
		206.6	0.1	2.46897e+17	1.48779e+16
		206.8	0.1	2.48716e+17	1.39935e+16
		207	0.1	2.5041e+17	1.31382e+16
		207.2	0.1	2.51974e+17	1.2313e+16
		207.4	0.1	2.53405e+17	1.15183e+16
		207.6	0.1	2.54699e+17	1.07548e+16
		207.8	0.1	2.55851e+17	1.00228e+16
		208	0.1	2.56858e+17	9322620000000000
		208.2	0.1	2.57716e+17	8654250000000000
		208.4	0.1	2.58421e+17	8017710000000000
		208.6	0.1	2.58972e+17	7412860000000000
		208.8	0.1	2.59363e+17	6839410000000000
		209	0.1	2.59594e+17	6297010000000000
		209.2	0.1	2.59661e+17	5785170000000000
		209.4	0.1	2.59562e+17	5303300000000000
		209.6	0.1	2.59295e+17	4850740000000000
		209.8	0.1	2.58859e+17	4426740000000000
		210	0.1	2.58252e+17	4030480000000000
		210.2	0.1	2.57473e+17	3661060000000000
		210.4	0.1	2.56522e+17	3317530000000000
		210.6	0.1	2.55398e+17	2998900000000000
		210.8	0.1	2.54101e+17	2704140000000000
		211	0.1	2.52632e+17	2432180000000000
		211.2	0.1	2.50991e+17	2181920000000000
		211.4	0.1	2.49179e+17	1952270000000000
		211.6	0.1	2.47197e+17	1742110000000000
		211.8	0.1	2.45048e+17	1550340000000000
		212	0.1	2.42733e+17	1375830000000000
		212.2	0.1	2.40255e+17	1217500000000000
		212.4	0.1	2.37618e+17	1074280000000000
		212.6	0.1	2.34823e+17	945114000000000
		212.8	0.1	2.31875e+17	828977000000000
		213	0.1	2.28778e+17	724882000000000
		213.2	0.1	2.25537e+17	631878000000000
		213.4	0.1	2.22155e+17	549050000000000
		213.6	0.1	2.18639e+17	475528000000000
		213.8	0.1	2.14992e+17	410485000000000
		214	0.1	2.11222e+17	353139000000000
		214.2	0.1	2.07335e+17	302756000000000
		214.4	0.1	2.03336e+17	258646000000000
		214.6	0.1	1.99232e+17	220168000000000
		214.8	0.1	1.9503e+17	186727000000000
		215	0.1	1.90737e+17	157772000000000
		215.2	0.1	1.86361e+17	132797000000000
		215.4	0.1	1.8191e+17	111340000000000
		215.6	0.1	1.77389e+17	92977400000000
		215.8	0.1	1.72809e+17	77327500000000
		216	0.1	1.68177e+17	64044600000000
		216.2	0.1	1.635e+17	52818300000000
		216.4	0.1	1.58787e+17	43371100000000
		216.6	0.1	1.54047e+17	35456100000000
		216.8	0.1	1.49288e+17	28854400000000
		217	0.1	1.44517e+17	23373500000000
		217.2	0.1	1.39743e+17	18844400000000
		217.4	0.1	1.34975e+17	15119600000000
		217.6	0.1	1.3022e+17	12071300000000
		217.8	0.1	1.25487e+17	9589020000000
		218	0.1	1.20782e+17	7578010000000
		218.2	0.1	1.16115e+17	5957240000000
		218.4	0.1	1.11492e+17	4657940000000
		218.6	0.1	1.0692e+17	3622010000000
		218.8	0.1	1.02406e+17	2800640000000
		219	0.1	9.79582e+16	2153090000000
		219.2	0.1	9.35814e+16	1645540000000
		219.4	0.1	8.92822e+16	1250070000000
		219.6	0.1	8.50662e+16	943810000000
		219.8	0.1	8.09388e+16	708102000000
		220	0.1	7.6905e+16	527843000000
		220.2	0.1	7.29694e+16	390883000000
		220.4	0.1	6.91361e+16	287511000000
		220.6	0.1	6.5409e+16	210020000000
		220.8	0.1	6.17914e+16	152334000000
		221	0.1	5.82862e+16	109695000000
		221.2	0.1	5.48959e+16	78407300000
		221.4	0.1	5.16226e+16	55620200000
		221.6	0.1	4.84679e+16	39150300000
		221.8	0.1	4.54331e+16	27339000000
		222	0.1	4.25189e+16	18936200000
		222.2	0.1	3.97257e+16	13007200000
		222.4	0.1	3.70534e+16	8858510000
		222.6	0.1	3.45018e+16	5980520000
		222.8	0.1	3.207e+16	4001500000
		223	0.1	2.97569e+16	2652890000
		223.2	0.1	2.75609e+16	1742320000
		223.4	0.1	2.54803e+16	1133310000
		223.6	0.1	2.3513e+16	729924000
		223.8	0.1	2.16565e+16	465379000
		224	0.1	1.99083e+16	293648000
		224.2	0.1	1.82654e+16	183326000
		224.4	0.1	1.67248e+16	113208000
		224.6	0.1	1.52832e+16	69131300
		224.8	0.1	1.39372e+16	41733600
		225	0.1	1.26832e+16	24899100
		225.2	0.1	1.15174e+16	14677000
		225.4	0.1	1.04363e+16	8545020
		225.6	0.1	9435810000000000	4912100
		225.8	0.1	8512190000000000	2787130
		226	0.1	7661540000000000	1560400
		226.2	0.1	6879960000000000	861681
		226.4	0.1	6163590000000000	469173
		226.6	0.1	5508610000000000	251787
		226.8	0.1	4911270000000000	133130
		227	0.1	4367880000000000	69325.1
		227.2	0.1	3874840000000000	35538.2
		227.4	0.1	3428660000000000	17926.9
		227.6	0.1	3025970000000000	8894.72
		227.8	0.1	2663500000000000	4338.86
		228	0.1	2338150000000000	2079.85
		228.2	0.1	2046920000000000	979.246
		228.4	0.1	1786970000000000	452.623
		228.6	0.1	1555610000000000	205.278
		228.8	0.1	1350310000000000	91.3009
		229	0.1	1168660000000000	39.8011
		229.2	0.1	1008440000000000	16.9963
		229.4	0.1	867537000000000	7.1055
		229.6	0.1	744021000000000	2.90637
		229.8	0.1	636086000000000	1.16237
		230	0.1	542072000000000	0.454251
		230.2	0.1	460451000000000	0.173343
		230.4	0.1	389826000000000	0.064546
		230.6	0.1	328923000000000	0.0234353
		230.8	0.1	276585000000000	0.00829049
		231	0.1	231764000000000	0.00285535
		231.2	0.1	193518000000000	0.000956654
		231.4	0.1	161000000000000	0.000311532
		231.6	0.1	133454000000000	9.85194e-05
		231.8	0.1	110207000000000	3.02288e-05
		232	0.1	90664100000000	8.99064e-06
		232.2	0.1	74297700000000	2.58945e-06
		232.4	0.1	60645700000000	7.21496e-07
		232.6	0.1	49303700000000	1.94272e-07
		232.8	0.1	39919200000000	5.0497e-08
		233	0.1	32186600000000	1.26562e-08
		233.2	0.1	25842100000000	3.05502e-09
		233.4	0.1	20658800000000	7.09356e-10
		233.6	0.1	16442700000000	1.58234e-10
		233.8	0.1	13028600000000	3.38644e-11
		234	0.1	10276500000000	6.94378e-12
		234.2	0.1	8068190000000	1.36218e-12
		234.4	0.1	6304570000000	2.55274e-13
		234.6	0.1	4902810000000	4.56284e-14
		234.8	0.1	3794080000000	7.76634e-15
		235	0.1	2921460000000	1.25665e-15
		235.2	0.1	2238140000000	1.92956e-16
		235.4	0.1	1705780000000	2.80641e-17
		235.6	0.1	1293220000000	3.85885e-18
		235.8	0.1	975177000000	5.00618e-19
		236	0.1	731340000000	6.11486e-20
		236.2	0.1	545422000000	7.01694e-21
		236.4	0.1	404462000000	7.54738e-22
		236.6	0.1	298200000000	7.59091e-23
		236.8	0.1	218562000000	7.12121e-24
		237	0.1	159232000000	6.21498e-25
		237.2	0.1	115299000000	5.03226e-26
		237.4	0.1	82967000000	3.76945e-27
		237.6	0.1	59322600000	2.60423e-28
		237.8	0.1	42142100000	1.65424e-29
		238	0.1	29739800000	9.62957e-31
		238.2	0.1	20846300000	5.11914e-32
		238.4	0.1	14512100000	2.47623e-33
		238.6	0.1	10032000000	1.08576e-34
		238.8	0.1	6885490000	4.29822e-36
		239	0.1	4691520000	1.52976e-37
		239.2	0.1	3172930000	4.8732e-39
		239.4	0.1	2129650000	1.38307e-40
		239.6	0.1	1418380000	3.48003e-42
		239.8	0.1	937232000	7.72308e-44
		240	0.1	614326000	1.50351e-45
		240.2	0.1	399371000	2.55297e-47
		240.4	0.1	257459000	3.7582e-49
		240.6	0.1	164557000	4.76587e-51
		240.8	0.1	104262000	5.17142e-53
		241	0.1	65472300	4.76752e-55
		241.2	0.1	40740800	3.70619e-57
		241.4	0.1	25116400	2.41024e-59
		241.6	0.1	15337600	1.30027e-61
		241.8	0.1	9275610	5.76742e-64
		242	0.1	5554190	2.08352e-66
		242.2	0.1	3292300	6.06919e-69
		242.4	0.1	1931460	1.41048e-71
		242.6	0.1	1121190	2.58582e-74
		242.8	0.1	643846	3.69504e-77
		243	0.1	365671	4.06336e-80
		243.2	0.1	205352	3.39235e-83
		243.4	0.1	113998	2.11925e-86
		243.6	0.1	62542.6	9.75518e-90
		243.8	0.1	33901.5	3.25473e-93
		244	0.1	18151.3	7.73383e-97
		244.2	0.1	9596.68	1.28447e-100
		244.4	0.1	5008.81	1.46145e-104
		244.6	0.1	2579.99	1.11492e-108
		244.8	0.1	1311.12	5.57317e-113
		245	0.1	657.155	1.78088e-117
		245.2	0.1	324.755	3.54266e-122
		245.4	0.1	158.184	4.26394e-127
		245.6	0.1	75.9167	3.0114e-132
		245.8	0.1	35.8863	1.20744e-137
		246	0.1	16.7024	2.65248e-143
		246.2	0.1	7.65112	3.07216e-149
		246.4	0.1	3.44826	1.79978e-155
		246.6	0.1	1.52838	5.09897e-162
		246.8	0.1	0.665945	6.65439e-169
		247	0.1	0.285129	3.79483e-176
		247.2	0.1	0.119908	8.9301e-184
		247.4	0.1	0.0495068	8.14793e-192
		247.6	0.1	0.0200581	2.69341e-200
		247.8	0.1	0.00797104	2.99566e-209
		248	0.1	0.00310546	1.034e-218
		248.2	0.1	0.00118549	1.0139e-228
		248.4	0.1	0.000443209	2.5636e-239
		248.6	0.1	0.000162187	1.50284e-250
		248.8	0.1	5.80599e-05	1.81725e-262
		249	0.1	2.03207e-05	3.98513e-275
		249.2	0.1	6.94932e-06	1.37497e-288
		249.4	0.1	2.32068e-06	0
		249.6	0.1	7.56277e-07	0
		249.8	0.1	2.40353e-07	0
		250	0.1	7.44428e-08	0
		250.2	0.1	2.24538e-08	0
		250.4	0.1	6.59075e-09	0
		250.6	0.1	1.88115e-09	0
		250.8	0.1	5.21691e-10	0
		251	0.1	1.40459e-10	0
		251.2	0.1	3.6683e-11	0
		251.4	0.1	9.28489e-12	0
		251.6	0.1	2.27557e-12	0
		251.8	0.1	5.39503e-13	0
		252	0.1	1.23613e-13	0
		252.2	0.1	2.73438e-14	0
		252.4	0.1	5.83338e-15	0
		252.6	0.1	1.19887e-15	0
		252.8	0.1	2.37095e-16	0
		253	0.1	4.50669e-17	0
		253.2	0.1	8.22328e-18	0
		253.4	0.1	1.43857e-18	0
		253.6	0.1	2.40957e-19	0
		253.8	0.1	3.85897e-20	0
		254	0.1	5.90073e-21	0
		254.2	0.1	8.60187e-22	0
		254.4	0.1	1.1936e-22	0
		254.6	0.1	1.57399e-23	0
		254.8	0.1	1.96921e-24	0
		255	0.1	2.33327e-25	0
		255.2	0.1	2.61352e-26	0
		255.4	0.1	2.76215e-27	0
		255.6	0.1	2.74895e-28	0
		255.8	0.1	2.57087e-29	0
		256	0.1	2.25449e-30	0
		256.2	0.1	1.84965e-31	0
		256.4	0.1	1.41637e-32	0
		256.6	0.1	1.00981e-33	0
		256.8	0.1	6.68581e-35	0
		257	0.1	4.09968e-36	0
		257.2	0.1	2.32168e-37	0
		257.4	0.1	1.21067e-38	0
		257.6	0.1	5.79531e-40	0
		257.8	0.1	2.53833e-41	0
		258	0.1	1.01383e-42	0
		258.2	0.1	3.67946e-44	0
		258.4	0.1	1.20887e-45	0
		258.6	0.1	3.58138e-47	0
		258.8	0.1	9.52821e-49	0
		259	0.1	2.26665e-50	0
		259.2	0.1	4.79953e-52	0
		259.4	0.1	9.00286e-54	0
		259.6	0.1	1.4885e-55	0
		259.8	0.1	2.1578e-57	0
		260	0.1	2.72739e-59	0
		260.2	0.1	2.98822e-61	0
		260.4	0.1	2.82049e-63	0
		260.6	0.1	2.27852e-65	0
		260.8	0.1	1.56462e-67	0
		261	0.1	9.06654e-70	0
		261.2	0.1	4.39964e-72	0
		261.4	0.1	1.77343e-74	0
		261.6	0.1	5.88714e-77	0
		261.8	0.1	1.59495e-79	0
		262	0.1	3.4927e-82	0
		262.2	0.1	6.11959e-85	0
		262.4	0.1	8.4866e-88	0
		262.6	0.1	9.20899e-91	0
		262.8	0.1	7.72438e-94	0
		263	0.1	4.94382e-97	0
		263.2	0.1	2.38137e-100	0
		263.4	0.1	8.50714e-104	0
		263.6	0.1	2.21896e-107	0
		263.8	0.1	4.15615e-111	0
		264	0.1	5.49146e-115	0
		264.2	0.1	5.02223e-119	0
		264.4	0.1	3.11534e-123	0
		264.6	0.1	1.28259e-127	0
		264.8	0.1	3.42415e-132	0
		265	0.1	5.782e-137	0
		265.2	0.1	6.01257e-142	0
		265.4	0.1	3.74139e-147	0
		265.6	0.1	1.35082e-152	0
		265.8	0.1	2.73739e-158	0
		266	0.1	3.0041e-164	0
		266.2	0.1	1.71782e-170	0
		266.4	0.1	4.9095e-177	0
		266.6	0.1	6.70406e-184	0
		266.8	0.1	4.16594e-191	0
		267	0.1	1.11744e-198	0
		267.2	0.1	1.22175e-206	0
		267.4	0.1	5.11609e-215	0
		267.6	0.1	7.66765e-224	0
		267.8	0.1	3.82018e-233	0
		268	0.1	5.83723e-243	0
		268.2	0.1	2.50481e-253	0
		268.4	0.1	2.74103e-264	0
		268.6	0.1	6.88172e-276	0
		268.8	0.1	3.52926e-288	0
		269	0.1	0	0
		269.2	0.1	0	0
		269.4	0.1	0	0
		269.6	0.1	0	0
		269.8	0.1	0	0
		270	0.1	0	0
		270.2	0.1	0	0
		270.4	0.1	0	0
		270.6	0.1	0	0
		270.8	0.1	0	0
		271	0.1	0	0
		271.2	0.1	0	0
		271.4	0.1	0	0
		271.6	0.1	0	0
		271.8	0.1	0	0
		272	0.1	0	0
		272.2	0.1	0	0
		272.4	0.1	0	0
		272.6	0.1	0	0
		272.8	0.1	0	0
		273	0.1	0	0
		190	0.15	5.06843e+16	8.05724e+16
		190.2	0.15	5.2614e+16	8.28203e+16
		190.4	0.15	5.46079e+16	8.5098e+16
		190.6	0.15	5.66675e+16	8.7404e+16
		190.8	0.15	5.87944e+16	8.97368e+16
		191	0.15	6.09903e+16	9.20947e+16
		191.2	0.15	6.32568e+16	9.44759e+16
		191.4	0.15	6.55956e+16	9.68786e+16
		191.6	0.15	6.80083e+16	9.93006e+16
		191.8	0.15	7.04965e+16	1.0174e+17
		192	0.15	7.3062e+16	1.04194e+17
		192.2	0.15	7.57065e+16	1.0666e+17
		192.4	0.15	7.84314e+16	1.09137e+17
		192.6	0.15	8.12386e+16	1.11621e+17
		192.8	0.15	8.41297e+16	1.14109e+17
		193	0.15	8.71063e+16	1.16599e+17
		193.2	0.15	9.017e+16	1.19088e+17
		193.4	0.15	9.33225e+16	1.21572e+17
		193.6	0.15	9.65653e+16	1.24048e+17
		193.8	0.15	9.99e+16	1.26513e+17
		194	0.15	1.03328e+17	1.28963e+17
		194.2	0.15	1.06851e+17	1.31395e+17
		194.4	0.15	1.10471e+17	1.33805e+17
		194.6	0.15	1.14188e+17	1.36189e+17
		194.8	0.15	1.18005e+17	1.38543e+17
		195	0.15	1.21922e+17	1.40864e+17
		195.2	0.15	1.25942e+17	1.43147e+17
		195.4	0.15	1.30064e+17	1.45388e+17
		195.6	0.15	1.34291e+17	1.47583e+17
		195.8	0.15	1.38623e+17	1.49728e+17
		196	0.15	1.43062e+17	1.51818e+17
		196.2	0.15	1.47608e+17	1.5385e+17
		196.4	0.15	1.52264e+17	1.55818e+17
		196.6	0.15	1.57028e+17	1.57719e+17
		196.8	0.15	1.61902e+17	1.59548e+17
		197	0.15	1.66887e+17	1.61301e+17
		197.2	0.15	1.71983e+17	1.62974e+17
		197.4	0.15	1.77191e+17	1.64562e+17
		197.6	0.15	1.82511e+17	1.6606e+17
		197.8	0.15	1.87943e+17	1.67466e+17
		198	0.15	1.93487e+17	1.68775e+17
		198.2	0.15	1.99144e+17	1.69983e+17
		198.4	0.15	2.04912e+17	1.71085e+17
		198.6	0.15	2.10792e+17	1.72079e+17
		198.8	0.15	2.16783e+17	1.72961e+17
		199	0.15	2.22885e+17	1.73727e+17
		199.2	0.15	2.29097e+17	1.74374e+17
		199.4	0.15	2.35417e+17	1.749e+17
		199.6	0.15	2.41846e+17	1.753e+17
		199.8	0.15	2.4838e+17	1.75573e+17
		200	0.15	2.55019e+17	1.75716e+17
		200.2	0.15	2.61762e+17	1.75726e+17
		200.4	0.15	2.68606e+17	1.75603e+17
		200.6	0.15	2.75548e+17	1.75345e+17
		200.8	0.15	2.82588e+17	1.74949e+17
		201	0.15	2.89722e+17	1.74415e+17
		201.2	0.15	2.96947e+17	1.73743e+17
		201.4	0.15	3.04261e+17	1.72931e+17
		201.6	0.15	3.1166e+17	1.7198e+17
		201.8	0.15	3.1914e+17	1.7089e+17
		202	0.15	3.26699e+17	1.69662e+17
		202.2	0.15	3.34332e+17	1.68297e+17
		202.4	0.15	3.42035e+17	1.66795e+17
		202.6	0.15	3.49804e+17	1.65159e+17
		202.8	0.15	3.57633e+17	1.63391e+17
		203	0.15	3.65517e+17	1.61493e+17
		203.2	0.15	3.73452e+17	1.59468e+17
		203.4	0.15	3.81432e+17	1.57318e+17
		203.6	0.15	3.89451e+17	1.55048e+17
		203.8	0.15	3.97504e+17	1.52662e+17
		204	0.15	4.05582e+17	1.50162e+17
		204.2	0.15	4.13681e+17	1.47555e+17
		204.4	0.15	4.21793e+17	1.44845e+17
		204.6	0.15	4.29911e+17	1.42036e+17
		204.8	0.15	4.38027e+17	1.39135e+17
		205	0.15	4.46134e+17	1.36147e+17
		205.2	0.15	4.54224e+17	1.33078e+17
		205.4	0.15	4.62289e+17	1.29934e+17
		205.6	0.15	4.7032e+17	1.26721e+17
		205.8	0.15	4.78308e+17	1.23447e+17
		206	0.15	4.86244e+17	1.20118e+17
		206.2	0.15	4.9412e+17	1.1674e+17
		206.4	0.15	5.01926e+17	1.13321e+17
		206.6	0.15	5.09652e+17	1.09868e+17
		206.8	0.15	5.17288e+17	1.06389e+17
		207	0.15	5.24824e+17	1.0289e+17
		207.2	0.15	5.32251e+17	9.93781e+16
		207.4	0.15	5.39557e+17	9.58614e+16
		207.6	0.15	5.46732e+17	9.23466e+16
		207.8	0.15	5.53765e+17	8.88409e+16
		208	0.15	5.60646e+17	8.53513e+16
		208.2	0.15	5.67364e+17	8.18844e+16
		208.4	0.15	5.73907e+17	7.84471e+16
		208.6	0.15	5.80264e+17	7.50457e+16
		208.8	0.15	5.86426e+17	7.16865e+16
		209	0.15	5.92379e+17	6.83755e+16
		209.2	0.15	5.98114e+17	6.51184e+16
		209.4	0.15	6.03618e+17	6.19206e+16
		209.6	0.15	6.08882e+17	5.87872e+16
		209.8	0.15	6.13893e+17	5.57231e+16
		210	0.15	6.18642e+17	5.27326e+16
		210.2	0.15	6.23117e+17	4.98198e+16
		210.4	0.15	6.27307e+17	4.69884e+16
		210.6	0.15	6.31203e+17	4.42418e+16
		210.8	0.15	6.34794e+17	4.15827e+16
		211	0.15	6.38071e+17	3.90138e+16
		211.2	0.15	6.41022e+17	3.65371e+16
		211.4	0.15	6.4364e+17	3.41543e+16
		211.6	0.15	6.45916e+17	3.18668e+16
		211.8	0.15	6.4784e+17	2.96754e+16
		212	0.15	6.49404e+17	2.75806e+16
		212.2	0.15	6.50601e+17	2.55827e+16
		212.4	0.15	6.51423e+17	2.36812e+16
		212.6	0.15	6.51864e+17	2.18758e+16
		212.8	0.15	6.51916e+17	2.01653e+16
		213	0.15	6.51576e+17	1.85486e+16
		213.2	0.15	6.50838e+17	1.70242e+16
		213.4	0.15	6.49696e+17	1.55901e+16
		213.6	0.15	6.48148e+17	1.42443e+16
		213.8	0.15	6.4619e+17	1.29844e+16
		214	0.15	6.43821e+17	1.1808e+16
		214.2	0.15	6.41038e+17	1.07121e+16
		214.4	0.15	6.3784e+17	9694060000000000
		214.6	0.15	6.34229e+17	8750700000000000
		214.8	0.15	6.30203e+17	7878880000000000
		215	0.15	6.25766e+17	7075370000000000
		215.2	0.15	6.2092e+17	6336840000000000
		215.4	0.15	6.15667e+17	5659950000000000
		215.6	0.15	6.10013e+17	5041310000000000
		215.8	0.15	6.03962e+17	4477560000000000
		216	0.15	5.9752e+17	3965340000000000
		216.2	0.15	5.90695e+17	3501340000000000
		216.4	0.15	5.83494e+17	3082310000000000
		216.6	0.15	5.75926e+17	2705070000000000
		216.8	0.15	5.68e+17	2366540000000000
		217	0.15	5.59728e+17	2063740000000000
		217.2	0.15	5.5112e+17	1793770000000000
		217.4	0.15	5.42188e+17	1553910000000000
		217.6	0.15	5.32945e+17	1341520000000000
		217.8	0.15	5.23406e+17	1154110000000000
		218	0.15	5.13586e+17	989343000000000
		218.2	0.15	5.03498e+17	845009000000000
		218.4	0.15	4.93159e+17	719045000000000
		218.6	0.15	4.82587e+17	609532000000000
		218.8	0.15	4.71798e+17	514689000000000
		219	0.15	4.6081e+17	432878000000000
		219.2	0.15	4.49641e+17	362594000000000
		219.4	0.15	4.38311e+17	302461000000000
		219.6	0.15	4.26839e+17	251231000000000
		219.8	0.15	4.15244e+17	207774000000000
		220	0.15	4.03545e+17	171073000000000
		220.2	0.15	3.91765e+17	140216000000000
		220.4	0.15	3.79921e+17	114393000000000
		220.6	0.15	3.68036e+17	92883100000000
		220.8	0.15	3.56128e+17	75052700000000
		221	0.15	3.44219e+17	60344700000000
		221.2	0.15	3.32329e+17	48273200000000
		221.4	0.15	3.20477e+17	38416300000000
		221.6	0.15	3.08684e+17	30410000000000
		221.8	0.15	2.96968e+17	23941700000000
		222	0.15	2.85348e+17	18744600000000
		222.2	0.15	2.73843e+17	14592300000000
		222.4	0.15	2.62472e+17	11293800000000
		222.6	0.15	2.5125e+17	8688870000000
		222.8	0.15	2.40194e+17	6644090000000
		223	0.15	2.29321e+17	5048860000000
		223.2	0.15	2.18646e+17	3812160000000
		223.4	0.15	2.08182e+17	2859580000000
		223.6	0.15	1.97942e+17	2130690000000
		223.8	0.15	1.8794e+17	1576720000000
		224	0.15	1.78187e+17	1158590000000
		224.2	0.15	1.68692e+17	845235000000
		224.4	0.15	1.59466e+17	612093000000
		224.6	0.15	1.50516e+17	439918000000
		224.8	0.15	1.4185e+17	313733000000
		225	0.15	1.33473e+17	221973000000
		225.2	0.15	1.25392e+17	155778000000
		225.4	0.15	1.17608e+17	108415000000
		225.6	0.15	1.10127e+17	74810200000
		225.8	0.15	1.02948e+17	51171300000
		226	0.15	9.60739e+16	34688900000
		226.2	0.15	8.95033e+16	23299900000
		226.4	0.15	8.32352e+16	15503000000
		226.6	0.15	7.72675e+16	10215800000
		226.8	0.15	7.15969e+16	6665190000
		227	0.15	6.62195e+16	4304550000
		227.2	0.15	6.11306e+16	2751080000
		227.4	0.15	5.63246e+16	1739490000
		227.6	0.15	5.17952e+16	1087830000
		227.8	0.15	4.75356e+16	672656000
		228	0.15	4.35383e+16	411142000
		228.2	0.15	3.97953e+16	248326000
		228.4	0.15	3.62982e+16	148166000
		228.6	0.15	3.30381e+16	87302800
		228.8	0.15	3.00058e+16	50782400
		229	0.15	2.7192e+16	29151000
		229.2	0.15	2.4587e+16	16508000
		229.4	0.15	2.2181e+16	9218730
		229.6	0.15	1.99642e+16	5074820
		229.8	0.15	1.79266e+16	2752770
		230	0.15	1.60585e+16	1470760
		230.2	0.15	1.435e+16	773665
		230.4	0.15	1.27915e+16	400510
		230.6	0.15	1.13736e+16	203951
		230.8	0.15	1.00868e+16	102115
		231	0.15	8922350000000000	50245.3
		231.2	0.15	7871340000000000	24284.3
		231.4	0.15	6925370000000000	11522.7
		231.6	0.15	6076340000000000	5364.79
		231.8	0.15	5316490000000000	2449.5
		232	0.15	4638410000000000	1096.18
		232.2	0.15	4035100000000000	480.515
		232.4	0.15	3499910000000000	206.199
		232.6	0.15	3026600000000000	86.5654
		232.8	0.15	2609300000000000	35.5298
		233	0.15	2242550000000000	14.2474
		233.2	0.15	1921260000000000	5.57783
		233.4	0.15	1640690000000000	2.1304
		233.6	0.15	1396510000000000	0.793216
		233.8	0.15	1184710000000000	0.287683
		234	0.15	1001610000000000	0.101548
		234.2	0.15	843888000000000	0.0348569
		234.4	0.15	708498000000000	0.0116248
		234.6	0.15	592700000000000	0.00376325
		234.8	0.15	494019000000000	0.00118141
		235	0.15	410238000000000	0.000359312
		235.2	0.15	339378000000000	0.00010576
		235.4	0.15	279676000000000	3.00946e-05
		235.6	0.15	229574000000000	8.26952e-06
		235.8	0.15	187694000000000	2.19177e-06
		236	0.15	152830000000000	5.59633e-07
		236.2	0.15	123926000000000	1.37486e-07
		236.4	0.15	100065000000000	3.24555e-08
		236.6	0.15	80451200000000	7.35184e-09
		236.8	0.15	64398600000000	1.59574e-09
		237	0.15	51319100000000	3.31389e-10
		237.2	0.15	40710200000000	6.57428e-11
		237.4	0.15	32145000000000	1.24391e-11
		237.6	0.15	25262100000000	2.24089e-12
		237.8	0.15	19757600000000	3.83689e-13
		238	0.15	15376800000000	6.23246e-14
		238.2	0.15	11907600000000	9.58564e-15
		238.4	0.15	9174160000000	1.39312e-15
		238.6	0.15	7031560000000	1.90916e-16
		238.8	0.15	5360860000000	2.46163e-17
		239	0.15	4065100000000	2.97937e-18
		239.2	0.15	3065600000000	3.37673e-19
		239.4	0.15	2298900000000	3.57464e-20
		239.6	0.15	1714100000000	3.52515e-21
		239.8	0.15	1270620000000	3.22939e-22
		240	0.15	936288000000	2.74024e-23
		240.2	0.15	685746000000	2.14708e-24
		240.4	0.15	499143000000	1.54845e-25
		240.6	0.15	361027000000	1.02439e-26
		240.8	0.15	259450000000	6.19442e-28
		241	0.15	185228000000	3.41099e-29
		241.2	0.15	131354000000	1.70369e-30
		241.4	0.15	92513300000	7.68655e-32
		241.6	0.15	64703100000	3.11892e-33
		241.8	0.15	44930800000	1.13295e-34
		242	0.15	30974000000	3.6664e-36
		242.2	0.15	21194200000	1.05165e-37
		242.4	0.15	14392500000	2.65924e-39
		242.6	0.15	9698100000	5.89415e-41
		242.8	0.15	6483260000	1.13826e-42
		243	0.15	4299170000	1.90305e-44
		243.2	0.15	2827380000	2.736e-46
		243.4	0.15	1843800000	3.35847e-48
		243.6	0.15	1192060000	3.49333e-50
		243.8	0.15	763921000	3.0544e-52
		244	0.15	485161000	2.22592e-54
		244.2	0.15	305296000	1.33989e-56
		244.4	0.15	190313000	6.59837e-59
		244.6	0.15	117499000	2.63141e-61
		244.8	0.15	71832800	8.40648e-64
		245	0.15	43475200	2.12666e-66
		245.2	0.15	26042800	4.20826e-69
		245.4	0.15	15437000	6.42878e-72
		245.6	0.15	9052300	7.47653e-75
		245.8	0.15	5250120	6.52117e-78
		246	0.15	3010790	4.19822e-81
		246.2	0.15	1706790	1.96109e-84
		246.4	0.15	956203	6.52637e-88
		246.6	0.15	529259	1.51728e-91
		246.8	0.15	289340	2.41291e-95
		247	0.15	156186	2.56612e-99
		247.2	0.15	83222.2	1.78123e-103
		247.4	0.15	43758.2	7.86159e-108
		247.6	0.15	22696.6	2.14493e-112
		247.8	0.15	11609.2	3.5094e-117
		248	0.15	5853.69	3.3321e-122
		248.2	0.15	2908.64	1.77201e-127
		248.4	0.15	1423.71	5.07933e-133
		248.6	0.15	686.219	7.52789e-139
		248.8	0.15	325.567	5.51396e-145
		249	0.15	151.978	1.90055e-151
		249.2	0.15	69.7752	2.92246e-158
		249.4	0.15	31.4931	1.89157e-165
		249.6	0.15	13.9678	4.83673e-173
		249.8	0.15	6.08475	4.55859e-181
		250	0.15	2.60225	1.46792e-189
		250.2	0.15	1.09203	1.48608e-198
		250.4	0.15	0.449451	4.3169e-208
		250.6	0.15	0.181325	3.25415e-218
		250.8	0.15	0.0716686	5.69812e-229
		251	0.15	0.0277364	2.05081e-240
		251.2	0.15	0.0105043	1.32506e-252
		251.4	0.15	0.00389063	1.32279e-265
		251.6	0.15	0.00140843	1.7269e-279
		251.8	0.15	0.000498009	2.44864e-294
		252	0.15	0.000171882	0
		252.2	0.15	5.78646e-05	0
		252.4	0.15	1.89878e-05	0
		252.6	0.15	6.06866e-06	0
		252.8	0.15	1.88768e-06	0
		253	0.15	5.71e-07	0
		253.2	0.15	1.67823e-07	0
		253.4	0.15	4.78853e-08	0
		253.6	0.15	1.32525e-08	0
		253.8	0.15	3.55413e-09	0
		254	0.15	9.22759e-10	0
		254.2	0.15	2.31701e-10	0
		254.4	0.15	5.62079e-11	0
		254.6	0.15	1.31591e-11	0
		254.8	0.15	2.96976e-12	0
		255	0.15	6.4532e-13	0
		255.2	0.15	1.34852e-13	0
		255.4	0.15	2.70652e-14	0
		255.6	0.15	5.21031e-15	0
		255.8	0.15	9.60762e-16	0
		256	0.15	1.6945e-16	0
		256.2	0.15	2.85425e-17	0
		256.4	0.15	4.58443e-18	0
		256.6	0.15	7.00995e-19	0
		256.8	0.15	1.01869e-19	0
		257	0.15	1.40441e-20	0
		257.2	0.15	1.83344e-21	0
		257.4	0.15	2.26213e-22	0
		257.6	0.15	2.6325e-23	0
		257.8	0.15	2.88336e-24	0
		258	0.15	2.96585e-25	0
		258.2	0.15	2.85833e-26	0
		258.4	0.15	2.57476e-27	0
		258.6	0.15	2.16233e-28	0
		258.8	0.15	1.68853e-29	0
		259	0.15	1.22262e-30	0
		259.2	0.15	8.18458e-32	0
		259.4	0.15	5.05008e-33	0
		259.6	0.15	2.86285e-34	0
		259.8	0.15	1.48604e-35	0
		260	0.15	7.0381e-37	0
		260.2	0.15	3.03008e-38	0
		260.4	0.15	1.18121e-39	0
		260.6	0.15	4.15221e-41	0
		260.8	0.15	1.31049e-42	0
		261	0.15	3.69658e-44	0
		261.2	0.15	9.27456e-46	0
		261.4	0.15	2.05925e-47	0
		261.6	0.15	4.02459e-49	0
		261.8	0.15	6.88463e-51	0
		262	0.15	1.0247e-52	0
		262.2	0.15	1.31865e-54	0
		262.4	0.15	1.45744e-56	0
		262.6	0.15	1.37378e-58	0
		262.8	0.15	1.09616e-60	0
		263	0.15	7.34553e-63	0
		263.2	0.15	4.09951e-65	0
		263.4	0.15	1.88861e-67	0
		263.6	0.15	7.1147e-70	0
		263.8	0.15	2.16985e-72	0
		264	0.15	5.30073e-75	0
		264.2	0.15	1.02555e-77	0
		264.4	0.15	1.55262e-80	0
		264.6	0.15	1.81582e-83	0
		264.8	0.15	1.61824e-86	0
		265	0.15	1.08299e-89	0
		265.2	0.15	5.35849e-93	0
		265.4	0.15	1.92776e-96	0
		265.6	0.15	4.9534e-100	0
		265.8	0.15	8.91858e-104	0
		266	0.15	1.10238e-107	0
		266.2	0.15	9.15104e-112	0
		266.4	0.15	4.9826e-116	0
		266.6	0.15	1.73487e-120	0
		266.8	0.15	3.75876e-125	0
		267	0.15	4.92048e-130	0
		267.2	0.15	3.77026e-135	0
		267.4	0.15	1.634e-140	0
		267.6	0.15	3.85973e-146	0
		267.8	0.15	4.77382e-152	0
		268	0.15	2.96007e-158	0
		268.2	0.15	8.77758e-165	0
		268.4	0.15	1.18255e-171	0
		268.6	0.15	6.84551e-179	0
		268.8	0.15	1.60224e-186	0
		269	0.15	1.41896e-194	0
		269.2	0.15	4.42206e-203	0
		269.4	0.15	4.47921e-212	0
		269.6	0.15	1.35168e-221	0
		269.8	0.15	1.10431e-231	0
		270	0.15	2.19843e-242	0
		270.2	0.15	9.49548e-254	0
		270.4	0.15	7.82703e-266	0
		270.6	0.15	1.06829e-278	0
		270.8	0.15	2.06249e-292	0
		271	0.15	0	0
		271.2	0.15	0	0
		271.4	0.15	0	0
		271.6	0.15	0	0
		271.8	0.15	0	0
		272	0.15	0	0
		272.2	0.15	0	0
		272.4	0.15	0	0
		272.6	0.15	0	0
		272.8	0.15	0	0
		273	0.15	0	0
		190	0.2	7.60878e+16	1.39587e+17
		190.2	0.2	7.88295e+16	1.4377e+17
		190.4	0.2	8.16621e+16	1.4804e+17
		190.6	0.2	8.4588e+16	1.52398e+17
		190.8	0.2	8.76099e+16	1.56843e+17
		191	0.2	9.07303e+16	1.61375e+17
		191.2	0.2	9.39518e+16	1.65992e+17
		191.4	0.2	9.7277e+16	1.70694e+17
		191.6	0.2	1.00709e+17	1.7548e+17
		191.8	0.2	1.0425e+17	1.80349e+17
		192	0.2	1.07903e+17	1.85298e+17
		192.2	0.2	1.1167e+17	1.90327e+17
		192.4	0.2	1.15556e+17	1.95434e+17
		192.6	0.2	1.19562e+17	2.00616e+17
		192.8	0.2	1.23691e+17	2.05871e+17
		193	0.2	1.27947e+17	2.11197e+17
		193.2	0.2	1.32332e+17	2.16592e+17
		193.4	0.2	1.3685e+17	2.22051e+17
		193.6	0.2	1.41502e+17	2.27573e+17
		193.8	0.2	1.46294e+17	2.33154e+17
		194	0.2	1.51226e+17	2.38789e+17
		194.2	0.2	1.56303e+17	2.44476e+17
		194.4	0.2	1.61528e+17	2.50211e+17
		194.6	0.2	1.66903e+17	2.55988e+17
		194.8	0.2	1.72432e+17	2.61803e+17
		195	0.2	1.78118e+17	2.67652e+17
		195.2	0.2	1.83964e+17	2.73529e+17
		195.4	0.2	1.89973e+17	2.79429e+17
		195.6	0.2	1.96148e+17	2.85346e+17
		195.8	0.2	2.02492e+17	2.91274e+17
		196	0.2	2.09008e+17	2.97207e+17
		196.2	0.2	2.15699e+17	3.03139e+17
		196.4	0.2	2.22568e+17	3.09063e+17
		196.6	0.2	2.29619e+17	3.14971e+17
		196.8	0.2	2.36853e+17	3.20858e+17
		197	0.2	2.44274e+17	3.26715e+17
		197.2	0.2	2.51885e+17	3.32534e+17
		197.4	0.2	2.59688e+17	3.38309e+17
		197.6	0.2	2.67686e+17	3.4403e+17
		197.8	0.2	2.75882e+17	3.49689e+17
		198	0.2	2.84277e+17	3.55278e+17
		198.2	0.2	2.92876e+17	3.60788e+17
		198.4	0.2	3.01679e+17	3.66211e+17
		198.6	0.2	3.1069e+17	3.71536e+17
		198.8	0.2	3.19909e+17	3.76756e+17
		199	0.2	3.2934e+17	3.8186e+17
		199.2	0.2	3.38984e+17	3.86839e+17
		199.4	0.2	3.48843e+17	3.91684e+17
		199.6	0.2	3.58919e+17	3.96385e+17
		199.8	0.2	3.69212e+17	4.00932e+17
		200	0.2	3.79724e+17	4.05316e+17
		200.2	0.2	3.90457e+17	4.09528e+17
		200.4	0.2	4.01411e+17	4.13556e+17
		200.6	0.2	4.12587e+17	4.17393e+17
		200.8	0.2	4.23985e+17	4.21028e+17
		201	0.2	4.35606e+17	4.24452e+17
		201.2	0.2	4.4745e+17	4.27655e+17
		201.4	0.2	4.59516e+17	4.30629e+17
		201.6	0.2	4.71805e+17	4.33365e+17
		201.8	0.2	4.84315e+17	4.35853e+17
		202	0.2	4.97045e+17	4.38086e+17
		202.2	0.2	5.09995e+17	4.40056e+17
		202.4	0.2	5.23162e+17	4.41753e+17
		202.6	0.2	5.36546e+17	4.43172e+17
		202.8	0.2	5.50143e+17	4.44305e+17
		203	0.2	5.63951e+17	4.45146e+17
		203.2	0.2	5.77968e+17	4.45687e+17
		203.4	0.2	5.92189e+17	4.45924e+17
		203.6	0.2	6.06612e+17	4.45851e+17
		203.8	0.2	6.21233e+17	4.45464e+17
		204	0.2	6.36047e+17	4.44758e+17
		204.2	0.2	6.51049e+17	4.43731e+17
		204.4	0.2	6.66235e+17	4.42378e+17
		204.6	0.2	6.81598e+17	4.40699e+17
		204.8	0.2	6.97133e+17	4.38692e+17
		205	0.2	7.12833e+17	4.36356e+17
		205.2	0.2	7.28691e+17	4.3369e+17
		205.4	0.2	7.44699e+17	4.30696e+17
		205.6	0.2	7.60851e+17	4.27376e+17
		205.8	0.2	7.77137e+17	4.23732e+17
		206	0.2	7.93548e+17	4.19766e+17
		206.2	0.2	8.10075e+17	4.15483e+17
		206.4	0.2	8.26708e+17	4.10887e+17
		206.6	0.2	8.43437e+17	4.05985e+17
		206.8	0.2	8.6025e+17	4.00782e+17
		207	0.2	8.77137e+17	3.95286e+17
		207.2	0.2	8.94084e+17	3.89504e+17
		207.4	0.2	9.1108e+17	3.83446e+17
		207.6	0.2	9.28111e+17	3.77122e+17
		207.8	0.2	9.45164e+17	3.70541e+17
		208	0.2	9.62224e+17	3.63715e+17
		208.2	0.2	9.79276e+17	3.56656e+17
		208.4	0.2	9.96306e+17	3.49375e+17
		208.6	0.2	1.0133e+18	3.41888e+17
		208.8	0.2	1.03023e+18	3.34206e+17
		209	0.2	1.0471e+18	3.26345e+17
		209.2	0.2	1.06387e+18	3.1832e+17
		209.4	0.2	1.08054e+18	3.10146e+17
		209.6	0.2	1.09708e+18	3.01839e+17
		209.8	0.2	1.11347e+18	2.93415e+17
		210	0.2	1.1297e+18	2.84891e+17
		210.2	0.2	1.14575e+18	2.76283e+17
		210.4	0.2	1.16159e+18	2.67609e+17
		210.6	0.2	1.17721e+18	2.58886e+17
		210.8	0.2	1.19258e+18	2.50131e+17
		211	0.2	1.20768e+18	2.41361e+17
		211.2	0.2	1.22249e+18	2.32593e+17
		211.4	0.2	1.23698e+18	2.23845e+17
		211.6	0.2	1.25115e+18	2.15133e+17
		211.8	0.2	1.26496e+18	2.06474e+17
		212	0.2	1.27838e+18	1.97885e+17
		212.2	0.2	1.2914e+18	1.8938e+17
		212.4	0.2	1.304e+18	1.80976e+17
		212.6	0.2	1.31615e+18	1.72686e+17
		212.8	0.2	1.32782e+18	1.64526e+17
		213	0.2	1.339e+18	1.56508e+17
		213.2	0.2	1.34965e+18	1.48647e+17
		213.4	0.2	1.35977e+18	1.40952e+17
		213.6	0.2	1.36931e+18	1.33437e+17
		213.8	0.2	1.37827e+18	1.26112e+17
		214	0.2	1.38662e+18	1.18985e+17
		214.2	0.2	1.39434e+18	1.12066e+17
		214.4	0.2	1.4014e+18	1.05362e+17
		214.6	0.2	1.40778e+18	9.88796e+16
		214.8	0.2	1.41347e+18	9.26251e+16
		215	0.2	1.41844e+18	8.6603e+16
		215.2	0.2	1.42268e+18	8.0817e+16
		215.4	0.2	1.42616e+18	7.527e+16
		215.6	0.2	1.42887e+18	6.99636e+16
		215.8	0.2	1.43079e+18	6.48987e+16
		216	0.2	1.4319e+18	6.00753e+16
		216.2	0.2	1.4322e+18	5.54924e+16
		216.4	0.2	1.43166e+18	5.1148e+16
		216.6	0.2	1.43028e+18	4.70395e+16
		216.8	0.2	1.42804e+18	4.31634e+16
		217	0.2	1.42494e+18	3.95154e+16
		217.2	0.2	1.42096e+18	3.60907e+16
		217.4	0.2	1.41609e+18	3.28836e+16
		217.6	0.2	1.41034e+18	2.9888e+16
		217.8	0.2	1.4037e+18	2.70973e+16
		218	0.2	1.39617e+18	2.45043e+16
		218.2	0.2	1.38774e+18	2.21016e+16
		218.4	0.2	1.37842e+18	1.98814e+16
		218.6	0.2	1.36821e+18	1.78354e+16
		218.8	0.2	1.35712e+18	1.59554e+16
		219	0.2	1.34515e+18	1.4233e+16
		219.2	0.2	1.33231e+18	1.26597e+16
		219.4	0.2	1.31862e+18	1.12269e+16
		219.6	0.2	1.30408e+18	9926000000000000
		219.8	0.2	1.28871e+18	8748660000000000
		220	0.2	1.27253e+18	7686540000000000
		220.2	0.2	1.25555e+18	6731490000000000
		220.4	0.2	1.2378e+18	5875600000000000
		220.6	0.2	1.2193e+18	5111180000000000
		220.8	0.2	1.20007e+18	4430840000000000
		221	0.2	1.18014e+18	3827470000000000
		221.2	0.2	1.15955e+18	3294320000000000
		221.4	0.2	1.13831e+18	2824940000000000
		221.6	0.2	1.11646e+18	2413290000000000
		221.8	0.2	1.09404e+18	2053650000000000
		222	0.2	1.07108e+18	1740700000000000
		222.2	0.2	1.04762e+18	1469460000000000
		222.4	0.2	1.02369e+18	1235360000000000
		222.6	0.2	9.99331e+17	1034160000000000
		222.8	0.2	9.74591e+17	861977000000000
		223	0.2	9.49508e+17	715279000000000
		223.2	0.2	9.24125e+17	590856000000000
		223.4	0.2	8.98485e+17	485812000000000
		223.6	0.2	8.72632e+17	397546000000000
		223.8	0.2	8.4661e+17	323736000000000
		224	0.2	8.20466e+17	262318000000000
		224.2	0.2	7.94243e+17	211470000000000
		224.4	0.2	7.67987e+17	169589000000000
		224.6	0.2	7.41744e+17	135277000000000
		224.8	0.2	7.15557e+17	107317000000000
		225	0.2	6.89472e+17	84659600000000
		225.2	0.2	6.63532e+17	66402900000000
		225.4	0.2	6.3778e+17	51777500000000
		225.6	0.2	6.12258e+17	40130500000000
		225.8	0.2	5.87006e+17	30911900000000
		226	0.2	5.62065e+17	23660700000000
		226.2	0.2	5.37473e+17	17993300000000
		226.4	0.2	5.13265e+17	13592800000000
		226.6	0.2	4.89477e+17	10198700000000
		226.8	0.2	4.66142e+17	7598890000000
		227	0.2	4.43292e+17	5621420000000
		227.2	0.2	4.20954e+17	4128150000000
		227.4	0.2	3.99156e+17	3008820000000
		227.6	0.2	3.77923e+17	2176140000000
		227.8	0.2	3.57277e+17	1561500000000
		228	0.2	3.37237e+17	1111400000000
		228.2	0.2	3.17822e+17	784492000000
		228.4	0.2	2.99046e+17	549030000000
		228.6	0.2	2.80923e+17	380890000000
		228.8	0.2	2.63461e+17	261878000000
		229	0.2	2.46669e+17	178399000000
		229.2	0.2	2.30553e+17	120385000000
		229.4	0.2	2.15114e+17	80451800000
		229.6	0.2	2.00353e+17	53231100000
		229.8	0.2	1.86269e+17	34861600000
		230	0.2	1.72858e+17	22592300000
		230.2	0.2	1.60112e+17	14483900000
		230.4	0.2	1.48025e+17	9183110000
		230.6	0.2	1.36586e+17	5756340000
		230.8	0.2	1.25783e+17	3566300000
		231	0.2	1.15603e+17	2183060000
		231.2	0.2	1.0603e+17	1319900000
		231.4	0.2	9.7049e+16	787956000
		231.6	0.2	8.86411e+16	464288000
		231.8	0.2	8.07879e+16	269923000
		232	0.2	7.34697e+16	154773000
		232.2	0.2	6.6666e+16	87494800
		232.4	0.2	6.03555e+16	48744300
		232.6	0.2	5.45166e+16	26750800
		232.8	0.2	4.91272e+16	14455600
		233	0.2	4.41651e+16	7688120
		233.2	0.2	3.96077e+16	4022450
		233.4	0.2	3.54329e+16	2069360
		233.6	0.2	3.16184e+16	1046260
		233.8	0.2	2.81424e+16	519611
		234	0.2	2.49832e+16	253348
		234.2	0.2	2.21198e+16	121203
		234.4	0.2	1.95318e+16	56861.4
		234.6	0.2	1.71991e+16	26143.9
		234.8	0.2	1.51026e+16	11773.4
		235	0.2	1.32238e+16	5189.56
		235.2	0.2	1.15452e+16	2237.53
		235.4	0.2	1.00499e+16	943.002
		235.6	0.2	8721870000000000	388.196
		235.8	0.2	7546170000000000	155.976
		236	0.2	6508570000000000	61.1216
		236.2	0.2	5595800000000000	23.3405
		236.4	0.2	4795470000000000	8.67843
		236.6	0.2	4096040000000000	3.1391
		236.8	0.2	3486880000000000	1.10359
		237	0.2	2958160000000000	0.376739
		237.2	0.2	2500860000000000	0.124759
		237.4	0.2	2106740000000000	0.0400364
		237.6	0.2	1768320000000000	0.0124374
		237.8	0.2	1478780000000000	0.00373601
		238	0.2	1232010000000000	0.0010839
		238.2	0.2	1022490000000000	0.00030335
		238.4	0.2	845289000000000	8.17946e-05
		238.6	0.2	696020000000000	2.12207e-05
		238.8	0.2	570788000000000	5.28994e-06
		239	0.2	466154000000000	1.26524e-06
		239.2	0.2	379099000000000	2.89919e-07
		239.4	0.2	306978000000000	6.35445e-08
		239.6	0.2	247489000000000	1.33004e-08
		239.8	0.2	198638000000000	2.65396e-09
		240	0.2	158705000000000	5.03948e-10
		240.2	0.2	126211000000000	9.08916e-11
		240.4	0.2	99894700000000	1.55401e-11
		240.6	0.2	78684200000000	2.51351e-12
		240.8	0.2	61672200000000	3.83767e-13
		241	0.2	48095400000000	5.51863e-14
		241.2	0.2	37315400000000	7.45658e-15
		241.4	0.2	28800200000000	9.44302e-16
		241.6	0.2	22109500000000	1.11791e-16
		241.8	0.2	16880800000000	1.23379e-17
		242	0.2	12817000000000	1.26576e-18
		242.2	0.2	9676370000000	1.20343e-19
		242.4	0.2	7263000000000	1.05697e-20
		242.6	0.2	5419330000000	8.54711e-22
		242.8	0.2	4019270000000	6.34091e-23
		243	0.2	2962550000000	4.29972e-24
		243.2	0.2	2169920000000	2.65447e-25
		243.4	0.2	1579140000000	1.48581e-26
		243.6	0.2	1141670000000	7.50757e-28
		243.8	0.2	819858000000	3.4086e-29
		244	0.2	584726000000	1.3838e-30
		244.2	0.2	414111000000	4.99752e-32
		244.4	0.2	291182000000	1.59678e-33
		244.6	0.2	203249000000	4.48784e-35
		244.8	0.2	140811000000	1.10274e-36
		245	0.2	96808900000	2.35363e-38
		245.2	0.2	66037700000	4.33354e-40
		245.4	0.2	44687800000	6.83311e-42
		245.6	0.2	29993600000	9.15584e-44
		245.8	0.2	19963100000	1.03396e-45
		246	0.2	13173600000	9.75512e-48
		246.2	0.2	8617270000	7.61784e-50
		246.4	0.2	5586490000	4.87515e-52
		246.6	0.2	3588560000	2.5299e-54
		246.8	0.2	2283590000	1.05261e-56
		247	0.2	1439260000	3.46935e-59
		247.2	0.2	898216000	8.94212e-62
		247.4	0.2	554935000	1.7777e-64
		247.6	0.2	339326000	2.6859e-67
		247.8	0.2	205304000	3.03574e-70
		248	0.2	122877000	2.52356e-73
		248.2	0.2	72731700	1.51505e-76
		248.4	0.2	42563200	6.44165e-80
		248.6	0.2	24619500	1.89924e-83
		248.8	0.2	14071300	3.79597e-87
		249	0.2	7944520	5.01884e-91
		249.2	0.2	4429390	4.2752e-95
		249.4	0.2	2437950	2.2803e-99
		249.6	0.2	1324240	7.38421e-104
		249.8	0.2	709606	1.40402e-108
		250	0.2	374997	1.51163e-113
		250.2	0.2	195361	8.85969e-119
		250.4	0.2	100296	2.70822e-124
		250.6	0.2	50722.3	4.1208e-130
		250.8	0.2	25258.3	2.96626e-136
		251	0.2	12380	9.55489e-143
		251.2	0.2	5969.82	1.29604e-149
		251.4	0.2	2830.95	6.92541e-157
		251.6	0.2	1319.57	1.35499e-164
		251.8	0.2	604.305	8.95682e-173
		252	0.2	271.762	1.83071e-181
		252.2	0.2	119.952	1.0492e-190
		252.4	0.2	51.9372	1.51324e-200
		252.6	0.2	22.048	4.87217e-211
		252.8	0.2	9.17127	3.06561e-222
		253	0.2	3.73597	3.25072e-234
		253.2	0.2	1.48945	4.92463e-247
		253.4	0.2	0.580793	8.8611e-261
		253.6	0.2	0.221362	1.5396e-275
		253.8	0.2	0.0824093	2.0468e-291
		254	0.2	0.0299455	0
		254.2	0.2	0.0106133	0
		254.4	0.2	0.00366605	0
		254.6	0.2	0.0012332	0
		254.8	0.2	0.000403643	0
		255	0.2	0.000128444	0
		255.2	0.2	3.97011e-05	0
		255.4	0.2	1.19084e-05	0
		255.6	0.2	3.463e-06	0
		255.8	0.2	9.7535e-07	0
		256	0.2	2.65781e-07	0
		256.2	0.2	6.99957e-08	0
		256.4	0.2	1.77954e-08	0
		256.6	0.2	4.36237e-09	0
		256.8	0.2	1.02986e-09	0
[truncated: 6,737 more rows]
