# Supplementary material for: On the thermodynamic and kinetic aspects of immersion ice nucleation
Source: Copernicus journal article supplement (doi:10.5194/acp-18-17119-2018), 2018-12-04
Supplement: Supplementary file [file acp-18-17119-2018-supplement-title-page.pdf › acp-18-17119-2018-supplement-title-page.pdf]

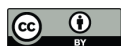

## *Supplement of*

# **On the thermodynamic and kinetic aspects of immersion ice nucleation**

**Donifan Barahona**

*Correspondence to:* Donifan Barahona ([donifan.o.barahona@nasa.gov](mailto:donifan.o.barahona@nasa.gov))

- [acp-18-17119-2018-supplement-title-page.pdf](#)
- [Fig\\_data.xlsx](#)

The copyright of individual parts of the supplement might differ from the CC BY 4.0 License.
